# Supplementary material for: Multiomics of a rice population identifies genes and genomic regions that bestow low glycemic index and high protein content
Source: PubMed Central journal article supplement — Proc Natl Acad Sci U S A. 2024 Aug 27;121(36):e2410598121. doi: 10.1073/pnas.2410598121 (PMC11388348; doi:10.1073/pnas.2410598121), 2024-08-27
Supplement: pnas.2410598121.sapp.pdf [file pnas.2410598121.sapp.pdf]

## Supporting Information for

### Multi-omics of a rice population identifies genes and genomic regions in rice that bestow low glycemic index and high protein content

Saurabh Badoni<sup>1,2,#</sup>, Erstelle A. Pasion-Uy<sup>1,3,#</sup>, Sakshi Kor<sup>1</sup>, Sung-Ryul Kim<sup>1</sup>, Gopal Misra<sup>1</sup>, Rhowell Jr. N. Tiozon<sup>1,3</sup>, Reuben James Q. Buenafe<sup>1</sup>, Luster May Labarga<sup>1</sup>, Ana Rose Ramos-Castrosanto<sup>1</sup>, Vipin Pratap<sup>2</sup>, Inez Slamet-Loedin<sup>1</sup>, Julia von Steimker<sup>3</sup>, Saleh Alseekh<sup>3,4</sup>, Alisdair R. Fernie<sup>3,4</sup>, Ajay Kohli<sup>1</sup>, Gurudev S. Khush<sup>5\*</sup> and Nese Sreenivasulu<sup>1,2\*</sup>

<sup>1</sup>International Rice Research Institute, Los Banos, Laguna, Philippines 4030

<sup>2</sup>IRRI South Asia Regional Centre (ISARC), Collectry farm, Varanasi, Uttar Pradesh 221006, India

<sup>3</sup>Max-Planck-Institute of Molecular Plant Physiology, Am Mühlenberg 1, 14476, Potsdam-Golm, Germany

<sup>4</sup>Center of Plant Systems Biology, 4000 Plovdiv, Bulgaria

<sup>5</sup>Department of Plant Sciences, University of California, Davis, CA 95616

#contributed equally

\*corresponding authors

Email: [n.sreenivasulu@irri.org](mailto:n.sreenivasulu@irri.org) , [gurudev@khush.org](mailto:gurudev@khush.org)

#### This PDF file includes:

SI Appendix, SI Materials and Methods

SI References

Figures S1 to S8

Tables S1 to S9

## SI Appendix, SI Materials and Methods

**Development of a F<sub>2</sub>-derived F<sub>3</sub> population.** The F<sub>2</sub>-derived F<sub>3</sub> mapping population was developed by employing the hybridization between Samba Mahsuri (a superior grain quality line with dominant allele of *OsSBE11b*) and IR36 amylose extender (IR36ae) line (recessive allele of *OsSBE11b*), a high amylose line mutant created using the IR36 (1, 2). Samba Mahsuri, one of the parents, is one of the most popular varieties consumed mainly across India due to its excellent cooking and eating qualities. A total of ~5500 F<sub>2</sub> progenies of IR36ae x Samba Mahsuri were raised. Upon examining the SNP variations existing in *SBE11B* (LOC\_Os02g32660) gene between both parents, one SNP (snp\_02\_19362520, G → A) previously reported by Butardo et al. (3), predicted to be located at the exon-intron junction (Exon 11 coordinates 19362521-19362640) was genotyped using Kompetitive allele specific PCR (KASP) assay. After assessing their fit to the Mendelian segregation ratio, a total of 369 F<sub>2</sub> progenies were selected and eventually self-pollinated until F<sub>3</sub> generation utilizing single seed descent (SSD) method and advanced to F<sub>6</sub> generation under open field conditions.

**Measurement of Amylose and Protein Content.** Seeds collected from F<sub>3</sub> generations of each family were bulk-harvested and dried until seed moisture content of 12-14% was attained. The samples were subjected to milling and the homogenized rice powder was subjected to amylose and protein estimation. The apparent amylose content (AC) was determined using an in-house validated method by the IRRI Service Laboratories (4) which was based on ISO 6647-2:2020 (Rice—Determination of Amylose Content—Part2: Routine Methods) (5) method. The apparent amylose content (AC) was determined using an in-house validated method by the IRRI Service Laboratories (4) which was based on ISO 6647-2:2020 (Rice—Determination of Amylose Content—Part2: Routine Methods) (5) method. The test solution is prepared by hot-dispersion with sodium hydroxide and analyzed using the San++ Segmented Flow Analyser (SFA) system (Skalar Analytical B.V., The Netherlands) and allowed to react with iodine to form amylose-iodine complex (K-I<sub>2</sub>). The absorbance of the iodine complex solution was determined at 620 nm wavelength and the AC (%) was quantified against the standard curves.

Crude protein content (PC) was measured using an in-house protocol of the IRRI Service Laboratories (54). A test portion of rice flour (50 mg) was digested in sulfuric acid (2 mL) with 1 g anhydrous potassium sulfate:selenium mixture (50:1, w/w) for 1 h at 380 °C. The sample was then cooled to room temperature, made up to volume (20 mL) with deionised water, and kept overnight to allow for sedimentation. The liberated ammonium in the digest was allowed to react with the solution consisting of sodium salicylate and sodium nitroprusside, and aqueous sodium hypochlorite through the glass transition lines in a Continuous Flow Analyser (CFA) system. The absorbance values of the ammonia-salicylate complex were determined at  $\lambda = 660$  nm, and the % Kjeldahl N values of the samples were determined based on the non-linear relationship between absorbance and analyte concentration, following the Beer-Lambert Law based on a standard curve developed using ammonium sulfate solutions with different concentrations. Finally, the crude PC was calculated by multiplying the Kjeldahl N value by 5.95 (6).

**In-vitro GI and resistance starch analysis.** The in vitro GI values of the milled rice samples of the F<sub>5</sub> derived F<sub>6</sub> RIL mapping populations was measured at the Commonwealth Scientific and Industrial Research Organisation (CSIRO), Adelaide, Australia using a predictive in vitro protocol that mimics the oral, gastric, pancreatic and intestinal digestion process in the human gut (7). The milled rice samples of T<sub>0</sub> homozygous lines of *sbe2b* genome edited lines and the corresponding wild type samples were subjected to the *in vitro* starch digestion was followed according to section 2.3.3 Method 3 described in Pautong et al. (8) with some modifications. Detailed method was described in the Supplementary information. In summary, the process involved cooking 300 ± 0.3 mg whole milled rice with a 1:2 rice-to-water ratio in a 50-ml tube over boiling water for 23 minutes. The sample was then left at room temperature for 5 minutes before it was transferred in a beaker fitted to the NutraScan GI20 Glycemic Index Analyser. It was added with 1mL of 0.05M sodium potassium phosphate buffer (pH 6.9) and the rice was minced using a

stainless-steel spatula. The temperature was maintained at 37°C. Subsequently, the 50-ml tube was washed with 4mL of the same buffer and the washing was also transferred to the beaker. To simulate the digestion process, the NutraScan GI20 Glycemic Index Analyser was used to dispense the necessary enzymes and buffers in the following manner: 2 mL of  $\alpha$ -amylase in 0.05 M sodium potassium phosphate buffer (pH 6.9), 3 mL of aqueous HCl (pH ~1), then 3 mL of pepsin in 0.1 M sodium potassium phosphate buffer (pH 1.5). It was allowed to incubate for 30 minutes before the addition of 15 mL of aqueous NaOH (pH ~12.6). Following this, a 15 mL enzyme solution containing pancreatin and amyloglucosidase in 0.1 M sodium potassium phosphate buffer (pH 6.9) was added and was allowed to incubate for another 30 minutes. Duplicate aliquots (0.70 mL) were withdrawn at 0 minutes (just before pancreatin-AMG addition) and at 30 minutes (after pancreatin-AMG addition). The aliquots were placed on ice until centrifugation (13,500 rpm, 10 minutes, 4 °C). After which, a 1- $\mu$ L aliquot of the supernatant was transferred to a 0.6-mL microfuge tube and added with 9  $\mu$ L of AMG solution (33.3 U/mL in 0.4 M sodium acetate buffer, pH 5.0), vortexed, and incubated in a water bath (50 °C) for 20 minutes. Lastly, glucose in the mixture and reagent blank were measured by adding GOPOD reagent. The absorbance values at 510 nm for both the sample and glucose standard were corrected using a reagent blank. The corrected values were then converted into glucose concentrations (mg/ml of aliquot) following the equation described by Pautong et al.(8) in section 2.3.4 and the area under the curve (AUC) was calculated based on the trapezoidal rule. Finally, the predictive GI (pGI) of the samples were computed using the linear equation  $pGI = 0.07821 \times AUC$  (corrected) + 47.8876.

**Bulk generation, DNA isolation and whole genome sequencing.** Based on the extreme phenotypes of grain quality phenotype including AC and PC, the 14-15 progenies per bulk were selected from either of the extreme phenotypes and bulk sets were created for each respective phenotype, constructing a total of four bulk sets. Bulk sets created for amylose content were confirmed for their contrasting glycaemic index values, i.e. high and low amylose bulk sets served as low and intermediate GI bulks, respectively. Genomic DNA was extracted from the selected bulk set individually using the cetyltrimethylammonium bromide (CTAB) method and purified using Qiagen DNeasy Plant Mini Kit. Qualitative analysis of DNA quality was done by running the samples on 1% agarose gel and by performing the DNA quantification through NanoDrop 2000. The final DNA concentration was adjusted to 100 ng/ $\mu$ L. The 30X- whole genome resequencing (WGS) was performed for all four bulk sets, aside from parental genotypes. Before library preparation, samples were ensured for the right concentration using fluorometer (Qubit Fluorometer, Invitrogen) and DNA sample integrity was assessed using agarose gel electrophoresis using 1% Agarose Gel (150 V for 40 min). 1 $\mu$ g genomic DNA was randomly fragmented, followed by purification and end repair performed using AxyPrep Mag PCR clean up Kit. The repair DNA were combined with A-tailing mix followed by incubation at 37°C for 30 min while Illumina adapters were ligated to adenylate 3' ends of the DNA following incubation of 16°C for 16h. Multiple rounds of PCR amplification were conducted to enrich the adapter-ligated DNA fragments. The 150 bp pair-end reads sequencing of qualified libraries was done using Illumina HiSeq X10 sequencer. The genotype data processing and QTL-seq analysis were detailed in Supplementary information.

#### **Genotype data processing and QTL-seq analysis.**

The clean reads from the extreme bulk sets for respective traits mapped onto the Nipponbare pseudomolecule reference (MSU version 7) and the variants were called. SNP calls with reference allele frequency of 0.2 in both bulks were filtered out and removed as these may be due to sequencing errors. Next Generation Sequencing (NGS)-based BSA analysis was performed following the earlier reports (9, 10). Briefly, SNP index was calculated as the ratio of the alternative allele reads to the total read depth in the individual bulk samples. Then, delta SNP index was calculated as per Takagi et al. (11). The genome wide G statistics (G value) was

calculated for each SNP by observed and expected allele depth of the reference and alternate allele assuming that the allele depth is equal for both resistance and susceptible bulks.  $G'$  value was calculated using a tricube smoothed  $G$  value by average weighted of the physical distance across the neighbouring SNPs within a given window that accounts for Linkage disequilibrium (LD) and also minimizes background noise attributed to SNP calling errors (9, 10). Both of the parents, IR36ae and Samba Mahsuri were used as references while calculating the key parameters of  $G'$ , delta SNP, and P values, and only peaks identified contrasting in both parents were used for analysis.

QTL Seq analysis or Bulk segregant (Bulk Seq) was performed on bulk sets created based on extreme values of amylose content and protein content. Bulk Seq analysis was implemented using the  $G$  statistics, wherein  $G'$  has been adopted avoiding the background noise during analysis while accounting for linkage disequilibrium (LD) between SNPs. Significant QTLs associated with AC and GPC were identified based on  $-\log_{10}P$ ,  $G'$  and delta SNP index based on the default thresholds setting of the pipeline. The genotyping-by-sequencing data was generated for  $F_5$ -derived  $F_6$  population following the Elshire et al. (12) method and have incorporated the following changes: 100 ng of genomic DNA were used, 3.6 ng of total adapters were used, the genomic DNAs were restricted with ApeKI enzyme, and the library was amplified with 18 PCR cycles. The 150-bp paired end reads were sequenced using the NovaSeq sequencing platform. The ABH format genotype data was created using PLINK1.9 (13) with 20% missingness call rate resulting in 44,946 SNPs after filtering.

**QTL mapping, targeted association and epistatic interaction analysis.** QTL mapping analysis for protein and AC was performed for the  $F_5$ -derived  $F_6$  recombinant inbred line population using composite interval mapping (CIM) method from the R/qtl package (14). Targeted association analysis of the candidate genes lying within the fine-mapped QTLs identified from BSA-seq and CIM analyses was conducted using PLINK1.9 (13) and EMMAX (15) and significant SNPs were filtered at 95% confidence level. Epistatic interactions among significant SNPs were also tested using PLINK1.9 at  $p < 0.05$ . Candidate genes common to AC and PC based on either BSA-seq analysis or CIM analysis, and genes with multiple epistatic interactions were used to construct the association network summary using Cytoscape (16). The percent phenotypic variation explained by the markers were calculated using LDAK (17). The expression profiles of candidate genes common to AC and PC based on BSA-seq and targeted association analyses were checked in the Rice eFP Browser (<http://bar.utoronto.ca/>) and genes with absolute expression value  $> 1000$  in developing embryos were selected and their significant SNPs were used to determine different allelic combinations showing distinct GI, AC, and PC values in the  $F_5$ -derived  $F_6$  RILs visualized using the *ggstatsplot* (18) R package.

**Sample Preparation and Extraction of Tissue Metabolites.** Brown rice flour samples of QTL-seq pools of high amylose and low amylose, and high protein and low proteins were added with 800  $\mu$ L of 80% methanol and homogenized for 90s. The homogenized samples were sonicated for 30 minutes at 4°C. Samples were then kept at -40°C for 1h, vortex mixed for 30s and kept for another 30 min. This was followed by centrifugation at 12,000 rpm and 4°C for 15 mins. The supernatant was transferred to a vial for LC-MS analysis.

**Metabolomic analysis of ultra-low, low, and high GI samples.** The extraction and processing of the samples for metabolomic analyses were performed following the previous study (19, 20) . Briefly, 50 mg of the rice samples were extracted with 1.2 mL MTBE:methanol. The upper lipid-containing phase (500  $\mu$ L) was dried in a SpeedVac concentrator and then resuspended in a 250  $\mu$ L acetonitrile:2-propanol (7:3, v/v) solution. Then, a volume of 2  $\mu$ L per sample was injected into a Waters Acquity ultra-performance LC system with an RP C8 column coupled with Fourier transform MS in positive ionization mode. The workflow included peak detection, retention time alignment, and removal of chemical noise. Identified lipids were confirmed through manual verification of the chromatograms using Xcalibur (version 3.0, Thermo-Fisher, Bremen,

Germany). Mass spectra were acquired using an Orbitrap high-resolution mass spectrometer: Fourier-transform mass spectrometer (FT-MS) coupled with a linear ion trap (LTQ) Orbitrap XL (ThermoFisher Scientific, <https://www.thermofisher.com>). Chromatograms and mass spectra were evaluated using Chroma TOF 4.5 (Leco) and TagFinder 4.2 software. Metabolite data correlation was analyzed using Expressionist Analyst 14.0.5 (Genedata, Basel, Switzerland) (<https://www.genedata.com/products/expressionist>). The metabolite reporting checklist is given in Supplementary Table 5.

**Mathematical Modeling for GI Classification, and Metabolomic Multivariate Statistical Analysis.** To classify each rice line independently to three GI classes (Ultra-low, Low and Intermediate, and High), the peak SNPs, significant targeted association SNPs, and grain quality parameters were used as input traits through the models following the previous works on classification modeling in rice (21-23). The phenome-genome models were created using MATLAB® (version R2023b) using either Random Forest or Artificial Neural Network, whichever showed higher accuracy. The hyperparameters for both models were optimized using a built-in Bayesian Optimization option in the software. The data set (n = 386) was split into training and testing sets with a 70:30 training-testing split ratio. The models were validated using 10-fold cross-validation. The selected phenome-genome parameters were combined to further improve the accuracy of the model. The processed metabolomic datasets were imported into a web-based software package, MetaboAnalyst v5.0, for principal component analysis (PCA) and orthogonal partial least squares discriminant analysis (oPLS-DA) to visualize the differences in metabolite between the two groups (24). Variable Importance in Projection (VIP) analysis in the oPLS-DA model was used to identify those metabolites having the highest discrimination potential (VIP score  $\geq 1$ ). Pathway enrichment analysis was performed using the *O. sativa japonica* as the KEGG pathway reference (24).

**Purification of rice protein isolate and quantification of amino acids.** The protein concentrate was isolated from the rice samples using the alkali extraction method as described by de Souza et al. (25), with slight modifications. In brief, 300 g of rice samples were combined with 1500 mL of 0.18% NaOH and stirred continuously for 30 minutes. The sample was then centrifuged to collect the protein extract, and the pH was adjusted to 4.8 by adding 0.1 M HCl. The resulting protein concentrate was obtained, and after centrifugation to remove the supernatant, it was neutralized and dried to yield the protein powder. The amino acids were quantified using the method reported by Sekhar and Reddy (26) with slight modifications. For amino acid quantification, seeds from all varieties were ground into a fine powder for analysis. Approximately 0.5-1.0 grams of each sample were weighed and transferred to a hydrolysis tube, followed by the addition of 3 ml of 6 N HCl. The tubes were sealed and placed in an oven at 110 °C for 24 hours for hydrolysis. After hydrolysis, the samples were diluted to 15 ml with borate buffer to adjust the pH to 6.5-7.5. The resulting solution was kept in a water bath at 37°C for 1 hour, and then filtered through a 0.22  $\mu\text{m}$  filter into a 1.5 ml HPLC vial for subsequent analysis. The vial was then prepared for analysis (26).

**Vector construction and rice transformation.** The single guide RNA (sgRNA) which specifically targets the 15<sup>th</sup> exon of *OsSBE11b* was designed by using the CRISPR RGEN tools (<http://www.rgenome.net/about/>). The 20bp gRNA with 4bp-overhangings was prepared by oligomer duplex (Table S1). And then, the short DNA duplex was ligated into the CRISPR-Cas9 binary vector (pSR339) digested with *AarI* restriction enzyme. The pSR339 vector was developed at the IRRI for a PCR-free single step CRISPR vector construction and it contains three cassettes on its T-DNA region: *pZmUbi1-SpCas9-tNOS* for expressing Cas9 protein, *pOsU3-AarI-LacZ-AarI*-gRNA scaffold for expressing sgRNA, and *p35S-HPT-tCaMV* as plant selection marker. After insertion of the oligomer duplex into pSR339, the sequence of the construct was confirmed by Sanger sequencing with Tnos-F primer. The final construct was transformed into *Agrobacterium tumefaciens* LBA4404 strain by using freeze-thaw method. For the *OsSBE11b* gene editing, a popular high-yielding *indica* variety (NSICRc222, IRRI designation-IRRI 154) was used as a background material. Rice transformation was conducted by using immature embryo based on an

efficient *indica* rice transformation method (27). Through rice transformation, more than 80 T<sub>0</sub> plants were produced. Information of all the oligomers used in this study is presented in Table S1.

**Sequence analysis of the *OsSBEIIb* target site.** To confirm the sequence of the CRISPR target site, PCR and Sanger sequencing were performed. Briefly, DNAs were prepared from T<sub>0</sub> plants by using a simple DNA extraction method (28). PCRs were conducted with two PCR primer sets: pUbi-F3/Cas9-97-R primer set to check T-DNA presence and SBEIIb-TS-F1/R1 primer set to amplify the *OsSBEIIb* target site. All the T<sub>0</sub> plants generated possessed the T-DNA. Thus, the target site amplicon from randomly selected 10 T<sub>0</sub> plants were sequenced by AB3730 DNA sequencer through the Macrogen, Korea (<https://dna.macrogen.com/main.do#>). Chromatograms of the sequencing results were manually analyzed.

## References

1. R. Kaushik, G. Khush, Genetic analysis of endosperm mutants in rice *Oryza sativa* L. *Theor. Appl. Genet* **83**, 146-152 (1991).
2. R. Kaushik, G. Khush, Endosperm mutants in rice: Gene expression in japonica and indica backgrounds. *Cereal Chem.* **68**, 487-491 (1991).
3. V. M. Butardo Jr *et al.*, Biomolecular analyses of starch and starch granule proteins in the high-amylose rice mutant Goami 2. *J. Agric. Food Chem.* **60**, 11576-11585 (2012).
4. IRRRI Service Laboratories, Rice plant, grain, and soil physico-chemical analyses (2018)
5. International Organization for Standardization, ISO 6647-2:2020 Rice — Determination of amylose content — Part 2: Spectrophotometric routine method without defatting procedure and with calibration from rice standards. (2020).
6. C. P. Villareal, J. W. Maranville, B. O. JULIANO, Nutrient Content and Retention During Milling of Brown Rices. *Cereal Chem.* **68**, 437-439 (1991).
7. R. Anacleto, S. Badoni, S. Parween, V.M. Butardo Jr, G. Misra, R. P. Cuevas, M. Kuhlmann, T. P. Trinidad, A. C. Mallillin, C. Acuin, A. R. Bird, M. K. Morell, N. Sreenivasulu. Integrating a genome-wide association study with a large-scale transcriptome analysis to predict genetic regions influencing the glycaemic index and texture in rice. *Plant biotechnology journal.* 1261-1275 (2019).
8. P. A. Pautong *et al.*, Evaluation of in vitro digestion methods and starch structure components as determinants for predicting the glycemic index of rice. *LWT* **168**, 113929 (2022).
9. P. M. Magwene, J. H. Willis, J. K. Kelly, The statistics of bulk segregant analysis using next generation sequencing. *PLoS Comput. Biol.* **7**, e1002255 (2011).
10. Z. Yang *et al.*, Mapping of quantitative trait loci underlying cold tolerance in rice seedlings via high-throughput sequencing of pooled extremes. *PLoS One* **8**, e68433 (2013).
11. H. Takagi *et al.*, QTL-seq: rapid mapping of quantitative trait loci in rice by whole genome resequencing of DNA from two bulked populations. *Plant J.* **74**, 174-183 (2013).
12. R. J. Elshire *et al.*, A robust, simple genotyping-by-sequencing (GBS) approach for high diversity species. *PLoS One* **6**, e19379 (2011).
13. S. Purcell *et al.*, PLINK: a tool set for whole-genome association and population-based linkage analyses. *Am. J. Hum. Genet.* **81**, 559-575 (2007).
14. D. Arends, P. Prins, R. C. Jansen, K. W. Broman, R/qtl: high-throughput multiple QTL mapping. *Bioinformatics* **26**, 2990-2992 (2010).
15. H. M. Kang *et al.*, Variance component model to account for sample structure in genome-wide association studies. *Nat. Genet.* **42**, 348-354 (2010).
16. P. Shannon *et al.*, Cytoscape: a software environment for integrated models of biomolecular interaction networks. *Genome Res.* **13**, 2498-2504 (2003).
17. D. Speed, J. Holmes, D. J. Balding, Evaluating and improving heritability models using summary statistics. *Nat. Genet.* **52**, 458-462 (2020).

18. I. Patil, Visualizations with statistical details: The 'ggstatsplot' approach. *J. Open Source Softw.* **6**, 3167 (2021).
19. R. J. N. Tiozon *et al.*, Metabolomics and machine learning technique revealed that germination enhances the multi-nutritional properties of pigmented rice. *Commun. Biol.* **6**, 1000 (2023).
20. S. Alseekh *et al.*, Mass spectrometry-based metabolomics: a guide for annotation, quantification and best reporting practices. *Nat. Methods* **18**, 747-756 (2021).
21. R. J. Buenafe, A. Rathnam, J. J. Añonuevo, S. Sundar, N. Sreenivasulu, Application of classification models in screening superior rice grain quality in male sterile and pollen parents. *J. Food Compos. Anal.* **104**, 104137 (2021).
22. R. J. Buenafe, R. Tiozon Jr, L. A. Boyd, K. J. Sartagoda, N. Sreenivasulu, Mathematical modeling to predict rice's phenolic and mineral content through multispectral imaging. *Food Chemistry Advances* **1**, 100141 (2022).
23. R. J. Q. Buenafe, V. Kumanduri, N. Sreenivasulu, Deploying viscosity and starch polymer properties to predict cooking and eating quality models: a novel breeding tool to predict texture. *Carbohydr. Polym.* **260**, 117766 (2021).
24. J. Chong, D. S. Wishart, J. Xia, Using MetaboAnalyst 4.0 for comprehensive and integrative metabolomics data analysis. *Curr. Protocol. Bioinf.* **68**, e86 (2019).
25. D. de Souza, A. F. Sbardelotto, D. R. Ziegler, L. D. F. Marczak, I. C. Tessaro, Characterization of rice starch and protein obtained by a fast alkaline extraction method. *Food Chem.* **191**, 36-44 (2016).
26. B. Sekhar, G. Reddy, Amino acid profiles in some scented rice varieties. *Theor. Appl. Genet* **62**, 35-37 (1982).
27. I. H. Slamet-Loedin, P. Chadha-Mohanty, L. Torrizo, "Agrobacterium-mediated transformation: rice transformation" in *Cereal Genomics: Methods and Protocols*, R. J. Henry, A. Furtado, Eds. (Humana Press, 2014), pp. 261-271.
28. S.-R. Kim, J. Yang, G. An, K. K. Jena, A simple DNA preparation method for high quality polymerase chain reaction in rice. *Plant Breed. Biotech.* **4**, 99-106 (2016).

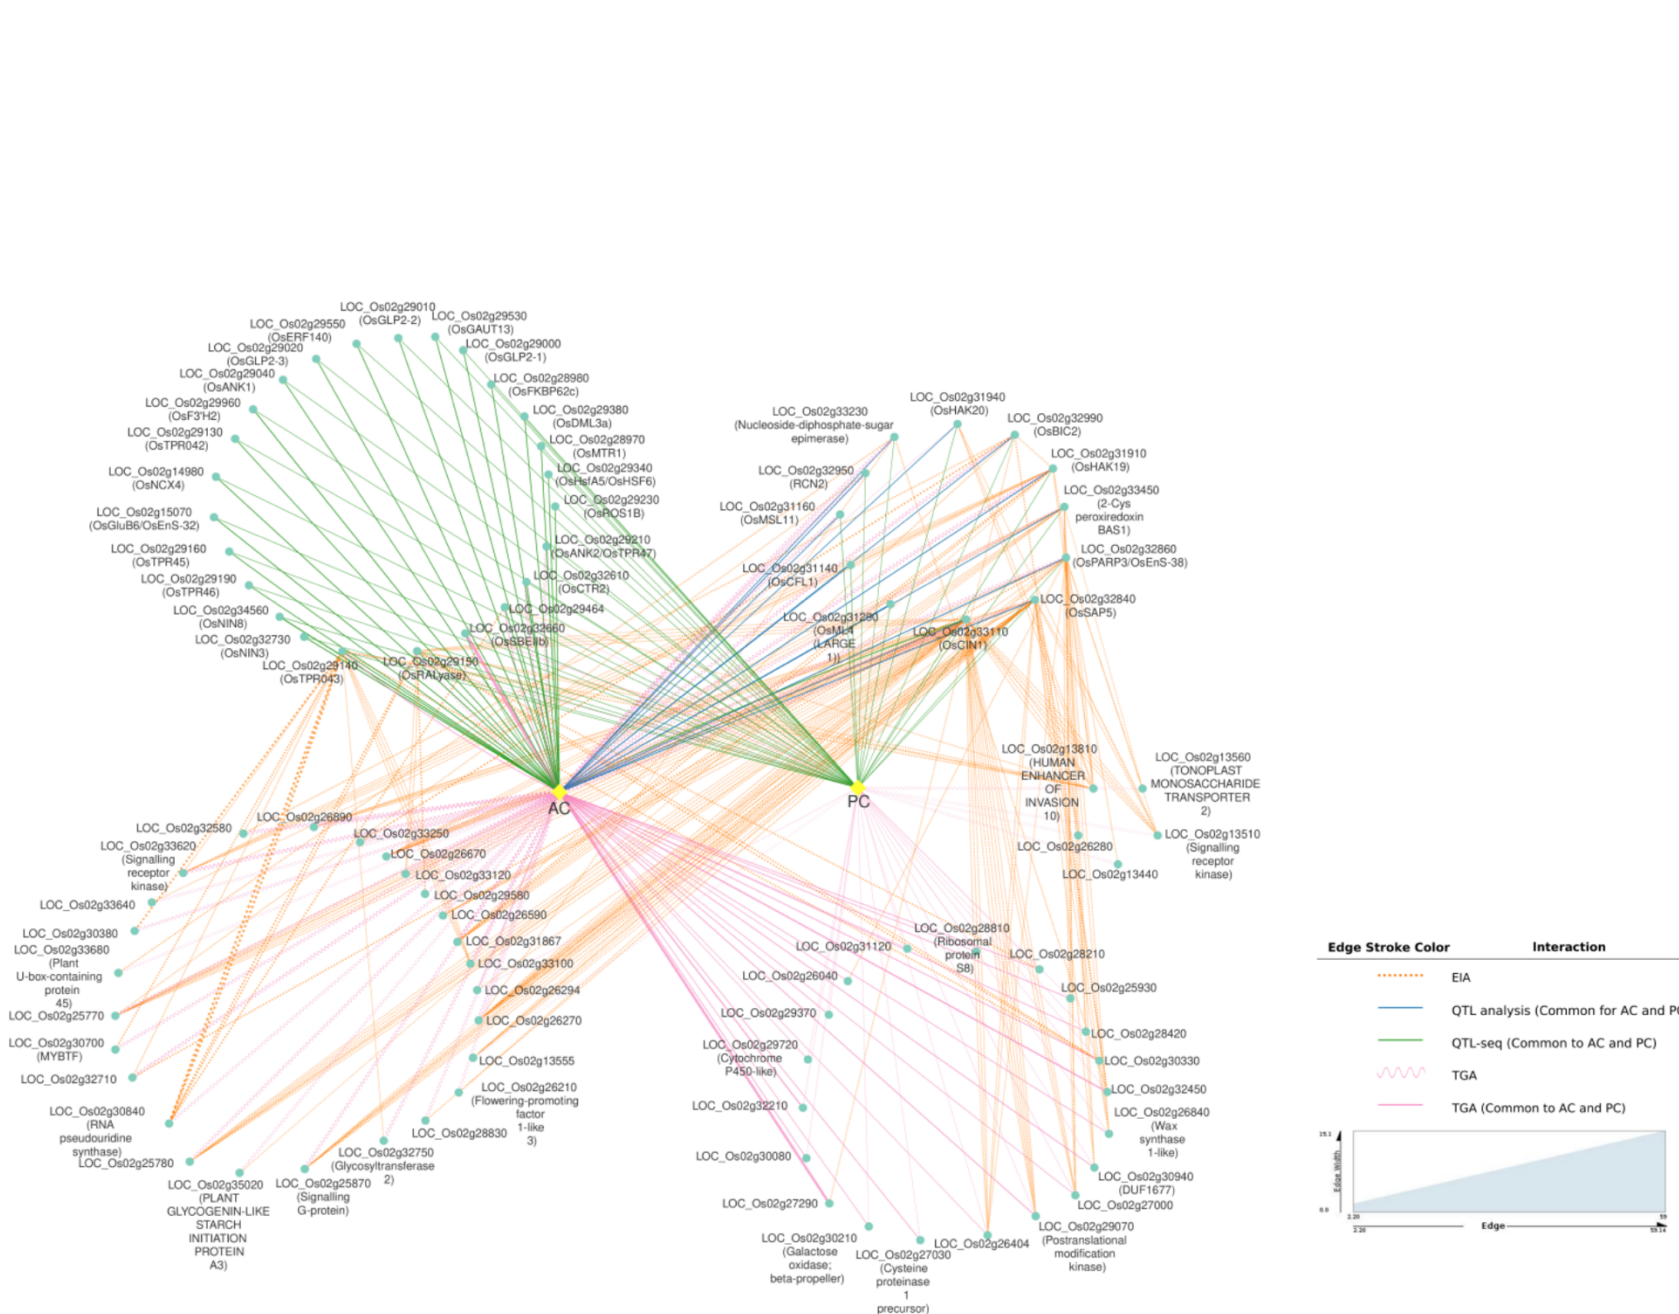

Supplementary Figure 1. Network analysis of genes resulted from QTL-seq and targeted association analyses



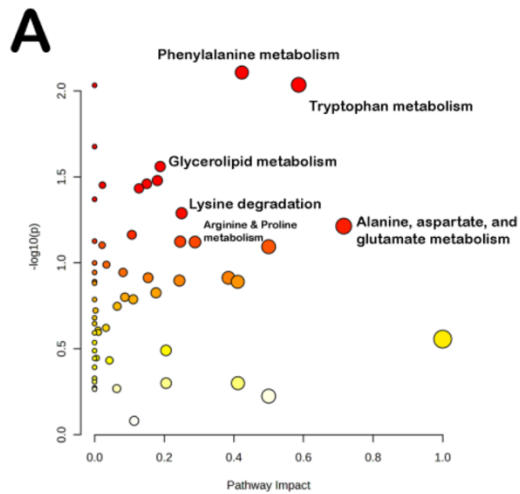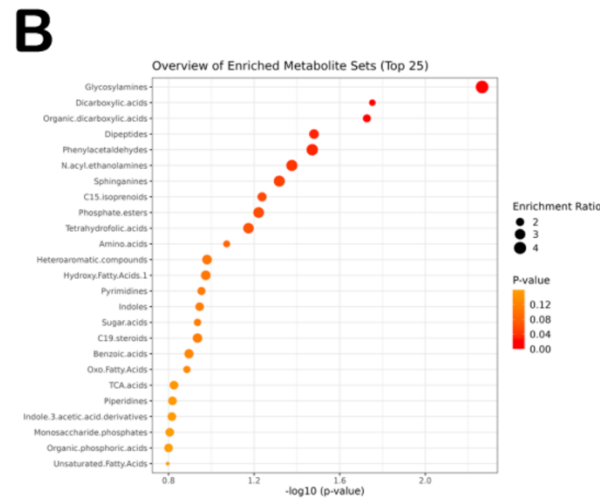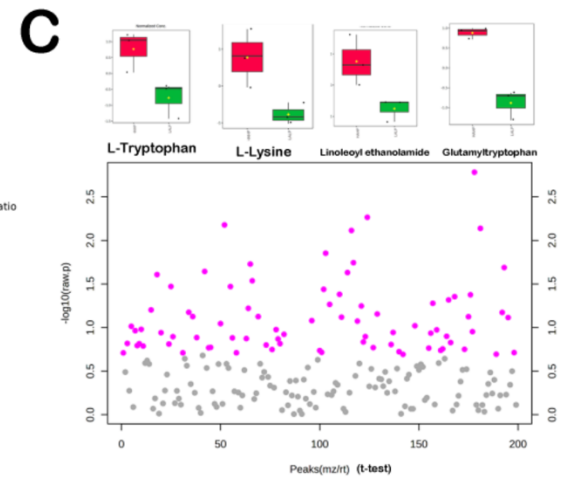

**Supplementary Figure 2.** Metabolomic analysis of high amylose high protein (HAHP) and low amylose low protein (LALP) in the positive ionization mode (A) Pathway impact showing amino acids and fatty acid metabolism were differentially accumulated between the two groups. (B) Enrichment analysis demonstrating the main class of compounds differentially accumulated between the two groups. (C) t-test analysis of metabolites demonstrating amino acids and dipeptides as accumulating in the HAHP lines.

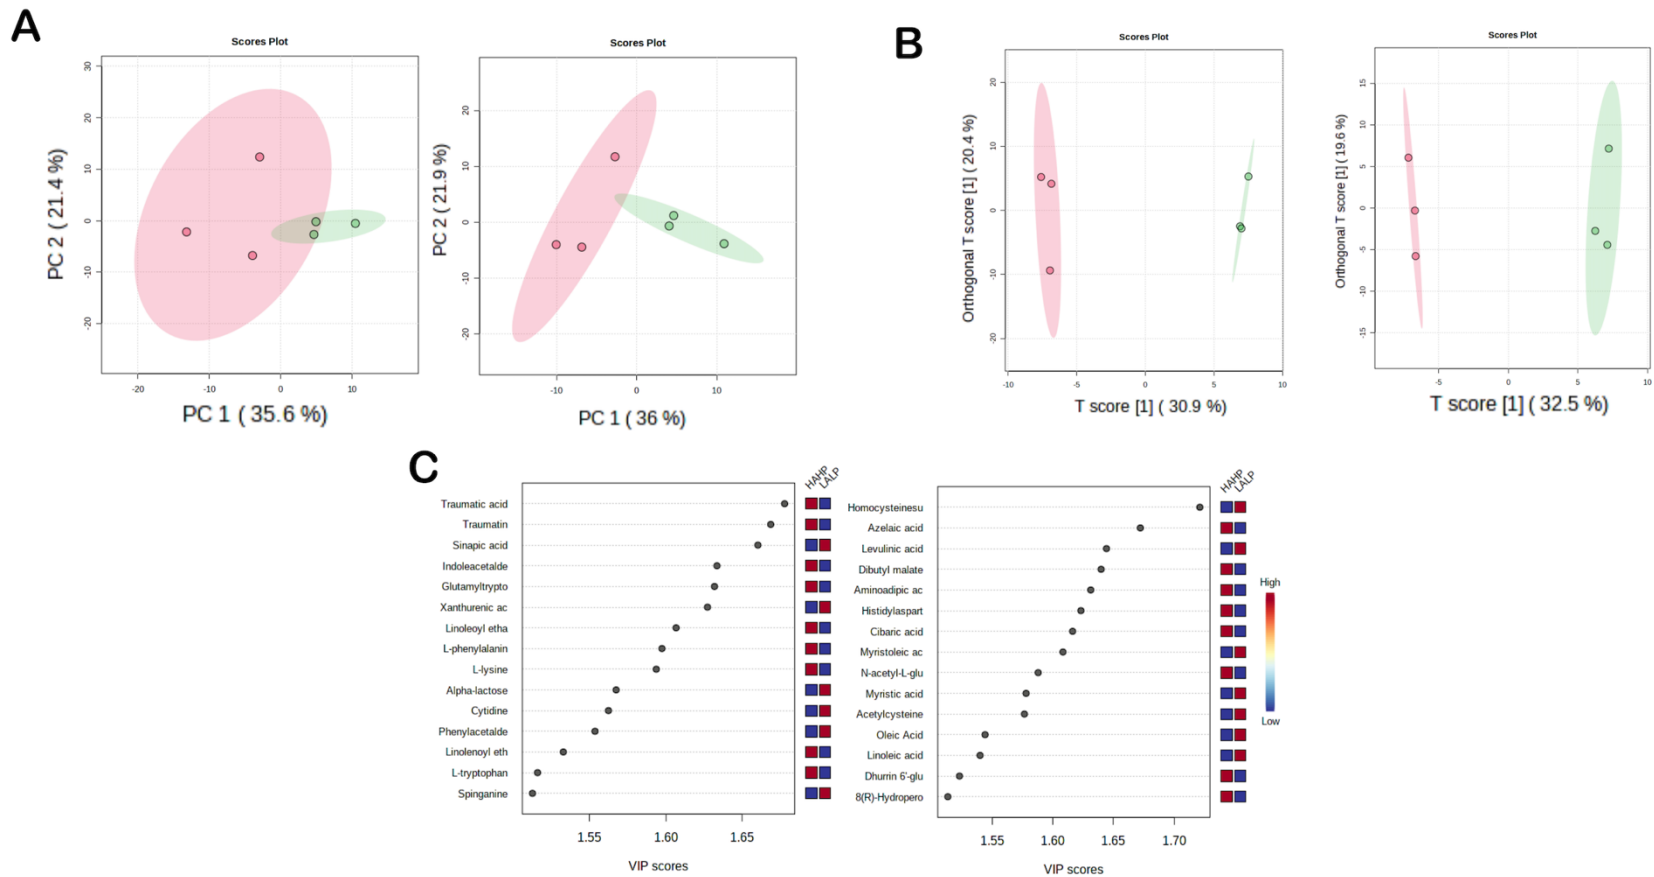

**Supplementary Figure 3.** Multivariate analysis of high amylose high protein (HAHP) and low amylose low protein (LALP) using the metabolomic data. (A) PCA distinguishing the HAHP and LALP in both negative and positive ionization modes. (B) PLS-DA model distinguishing the HAHP and LALP in both negative and positive ionization modes. (C) Top variable of important metabolites in both negative and positive ionization modes.

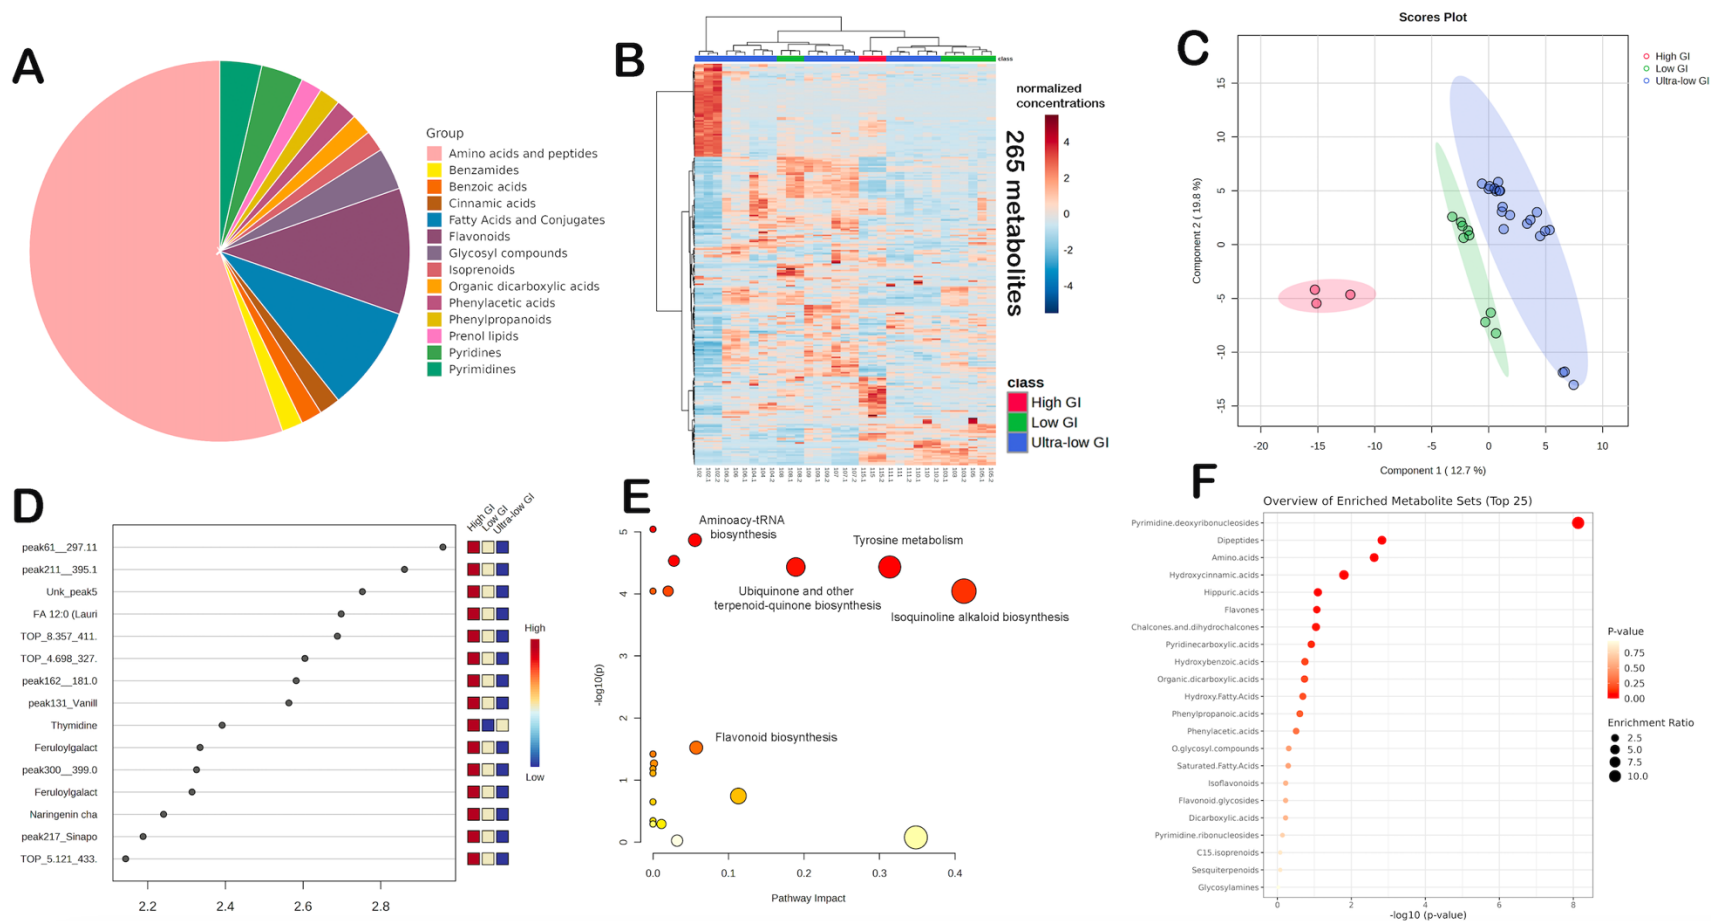

**Supplementary Figure 4.** Metabolomic analysis using methanolic extracts of high, low, and ultra-low GI rice lines. (A) Metabolite composition showing amino acid and dipeptides as predominant in the high, low, and ultra-low GI rice metabolome. (B) Heatmap distinguishing the high, low, and ultra-low GI rice lines using 265 metabolites. (C) PLS-DA model distinguishing the high, low, and ultra-low GI rice lines. (D) Top variable of important metabolites distinguishing the high, low, and ultra-low GI rice lines. (E) Pathway impact analysis showing amino acids and flavonoid biosynthesis as

differentially accumulated among the groups. (F) Enrichment analysis showing the top classes of compounds differentially accumulating among high, low, and ultra-low GI rice lines.

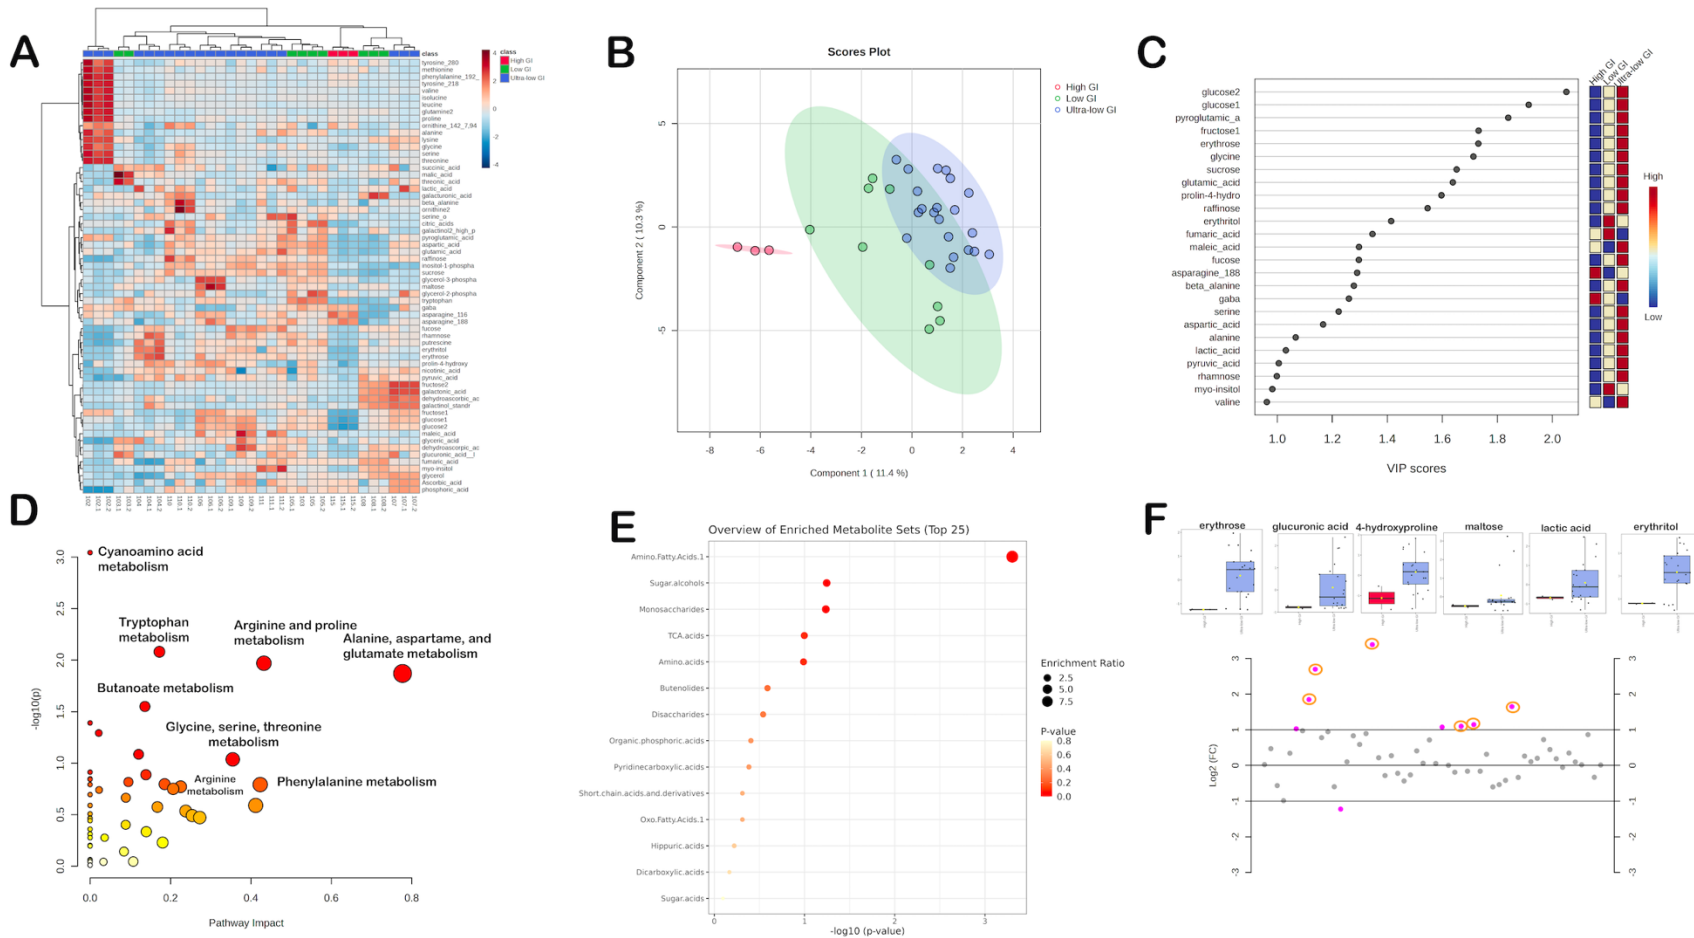

**Supplementary Figure 5.** GC metabolite analysis of high, low, and ultra-low GI rice lines. (A) Heatmap distinguishing the high, low,

and ultra-low GI rice lines using the primary metabolites through GC-TOF-MS. (B) PLS-DA model distinguishing the lipid profiles of high, low, and ultra-low GI rice lines using the primary metabolites. (C) Top variable of important primary metabolites distinguishing the high, low, and ultra-low GI rice lines. (D) Pathway impact analysis showing amino acids as differentially accumulated among the groups. (E) Enrichment analysis showing the amino acid and fatty acid pathways as differentially accumulated between ultra-low GI and high GI rice lines. (F) Specific metabolites that are highly accumulating in the low GI rice lines.

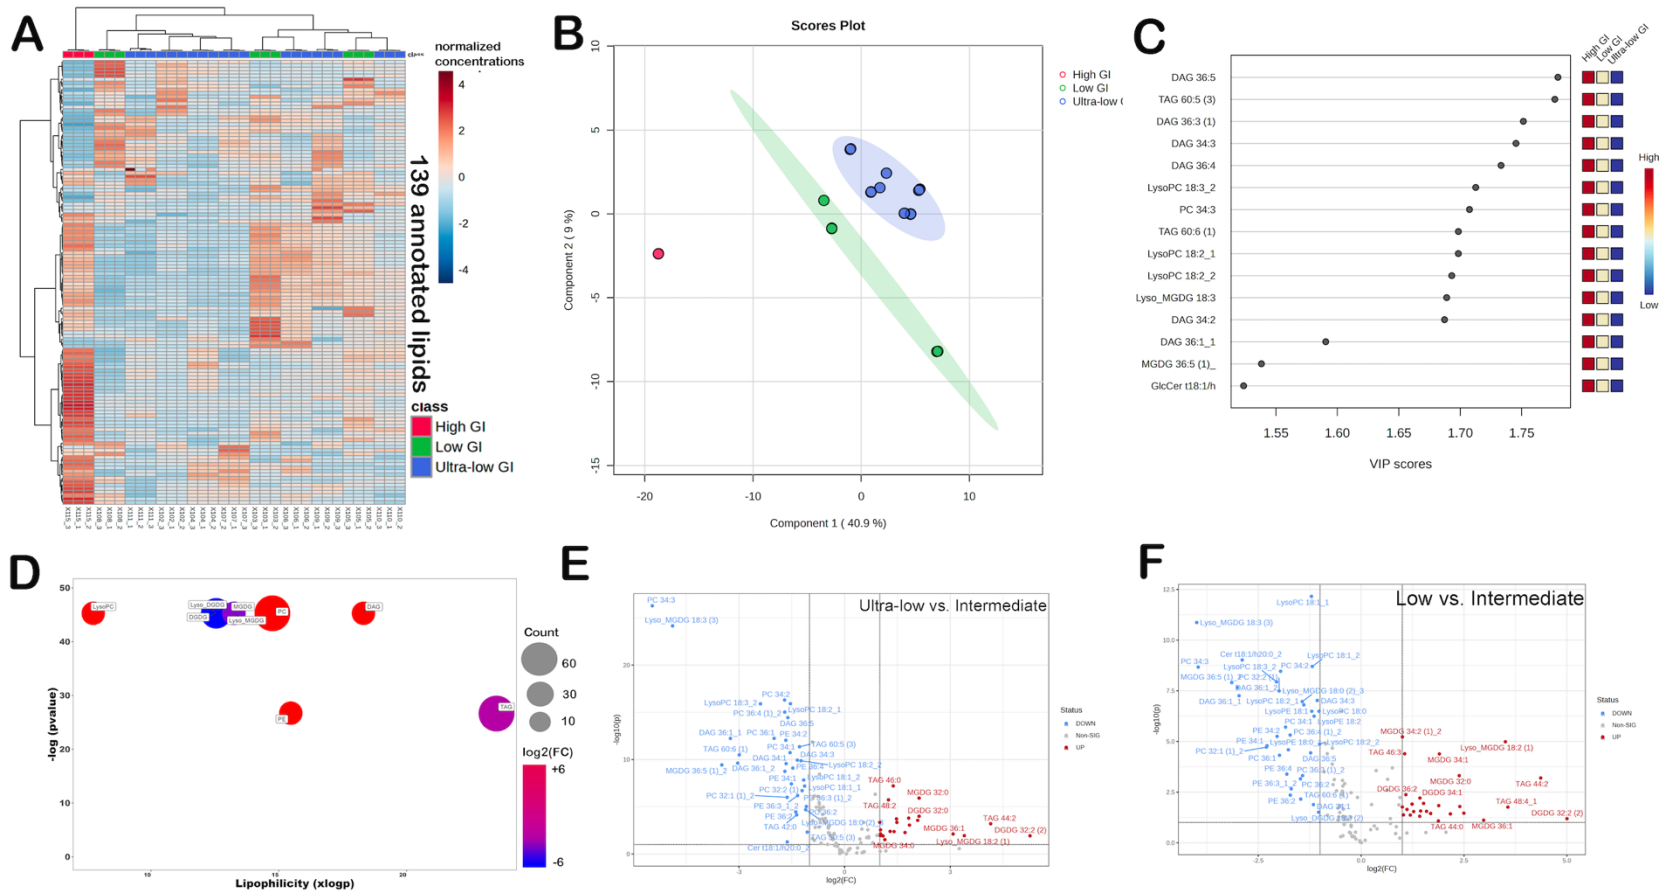

**Supplementary Figure 6.** Lipidomic analysis of high, low, and ultra-low GI rice lines. (A) Heatmap distinguishing the high, low, and ultralow GI rice lines using 139 annotated lipids. (B) PLS-DA model distinguishing the lipid profiles of high, low, and ultra-low GI rice lines. (C) Top variable of important lipids distinguishing the high, low, and ultra-low GI rice lines. (D) Lipid pathway analysis showing the main lipid classes differentially accumulated among the groups. (E) Volcano plot showing higher lipid accumulation in high GI compared to ultra-low rice lines. (F) Volcano plot showing higher lipid accumulation in high GI compared to low GI rice lines.

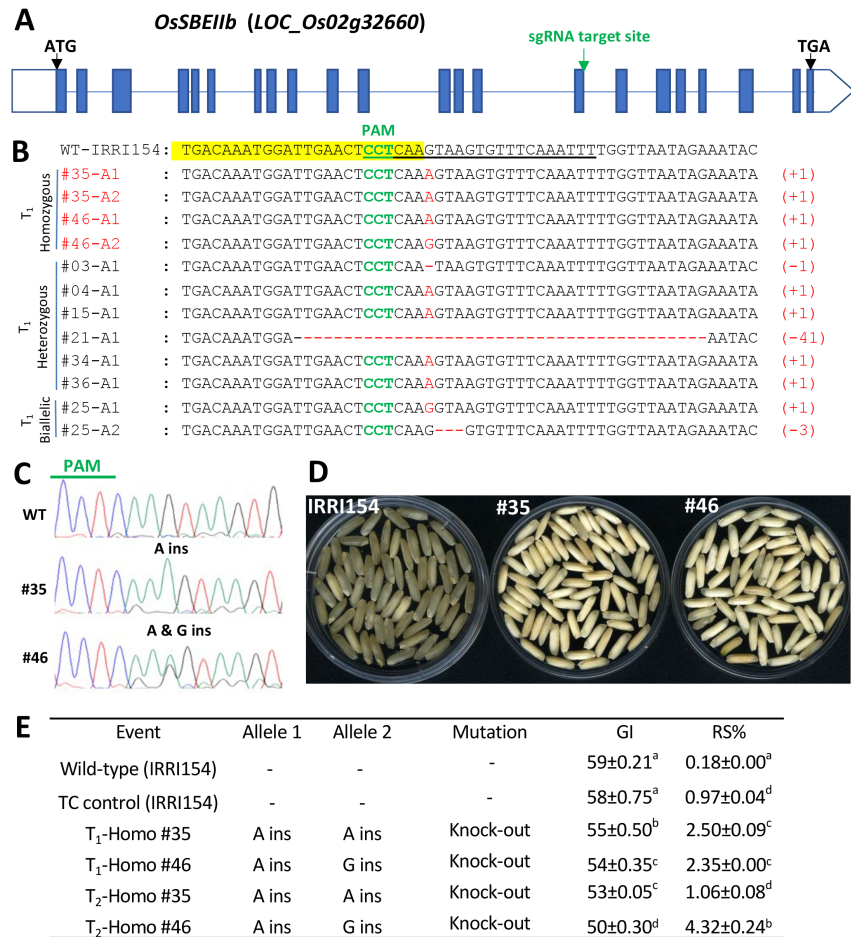

**Supplementary Figure 7:** CRISPR/Cas9-mediated *OsSBE11b* gene editing. (A) Schematic representation of the targeted gRNA site. (B) CRISPR/Cas9 induced mutations at donor-splicing site of 15th exon for *SBE11b* gene in IRRI154 background. Yellow highlight:

exonic region, underlined: target gRNA with green Protospacer-adjacent motif (PAM) sequence, A1: Allele 1, A2: Allele 2, #: mutant line number. (C) Chromatograms for selected homozygous lines in comparison with wild-type (WT). (D) T0 plant derived T1 seed morphology. (E) In-vitro GI and Resistance Starch (RS) percent of T1 and T2 homozygous seeds derived from T0 and T1 plants respectively, TC control: Tissue-culture derived plant without Agrobacterium co-cultivation.

\* a,b,c,d Duncan grouping code



```

Wild-type (IRRI154) 1 MAAPASAVPGSAGLRAGAVRFVPPAGARWRRAAELPTSRLLSGRRFPQAVRVGGSGRVAVRAAGASGEVMIPEGESDGMFVSAGSDLLQVPALDDE
T1-Homo #35-A1/A2 1 MAAPASAVPGSAGLRAGAVRFVPPAGARWRRAAELPTSRLLSGRRFPQAVRVGGSGRVAVRAAGASGEVMIPEGESDGMFVSAGSDLLQVPALDDE
T1-Homo #46-A1 1 MAAPASAVPGSAGLRAGAVRFVPPAGARWRRAAELPTSRLLSGRRFPQAVRVGGSGRVAVRAAGASGEVMIPEGESDGMFVSAGSDLLQVPALDDE
T1-Homo #46-A2 1 MAAPASAVPGSAGLRAGAVRFVPPAGARWRRAAELPTSRLLSGRRFPQAVRVGGSGRVAVRAAGASGEVMIPEGESDGMFVSAGSDLLQVPALDDE
T2-Homo #35-A1/A2 1 MAAPASAVPGSAGLRAGAVRFVPPAGARWRRAAELPTSRLLSGRRFPQAVRVGGSGRVAVRAAGASGEVMIPEGESDGMFVSAGSDLLQVPALDDE
T2-Homo #46-A1 1 MAAPASAVPGSAGLRAGAVRFVPPAGARWRRAAELPTSRLLSGRRFPQAVRVGGSGRVAVRAAGASGEVMIPEGESDGMFVSAGSDLLQVPALDDE
T2-Homo #46-A2 1 MAAPASAVPGSAGLRAGAVRFVPPAGARWRRAAELPTSRLLSGRRFPQAVRVGGSGRVAVRAAGASGEVMIPEGESDGMFVSAGSDLLQVPALDDE

Wild-type (IRRI154) 101 LSTEVGAIVEIESSGASDVEGKRVVEELAAEQKRVVPPPTDGGQKIFQMSMLNGYKHYLETRYSLYRRLRSDIDQVEGGLETFSRGYKFGFNRSAG
T1-Homo #35-A1/A2 101 LSTEVGAIVEIESSGASDVEGKRVVEELAAEQKRVVPPPTDGGQKIFQMSMLNGYKHYLETRYSLYRRLRSDIDQVEGGLETFSRGYKFGFNRSAG
T1-Homo #46-A1 101 LSTEVGAIVEIESSGASDVEGKRVVEELAAEQKRVVPPPTDGGQKIFQMSMLNGYKHYLETRYSLYRRLRSDIDQVEGGLETFSRGYKFGFNRSAG
T1-Homo #46-A2 101 LSTEVGAIVEIESSGASDVEGKRVVEELAAEQKRVVPPPTDGGQKIFQMSMLNGYKHYLETRYSLYRRLRSDIDQVEGGLETFSRGYKFGFNRSAG
T2-Homo #35-A1/A2 101 LSTEVGAIVEIESSGASDVEGKRVVEELAAEQKRVVPPPTDGGQKIFQMSMLNGYKHYLETRYSLYRRLRSDIDQVEGGLETFSRGYKFGFNRSAG
T2-Homo #46-A1 101 LSTEVGAIVEIESSGASDVEGKRVVEELAAEQKRVVPPPTDGGQKIFQMSMLNGYKHYLETRYSLYRRLRSDIDQVEGGLETFSRGYKFGFNRSAG
T2-Homo #46-A2 101 LSTEVGAIVEIESSGASDVEGKRVVEELAAEQKRVVPPPTDGGQKIFQMSMLNGYKHYLETRYSLYRRLRSDIDQVEGGLETFSRGYKFGFNRSAG

Wild-type (IRRI154) 201 VTYREKAPGAHSAALVDFNNWPNADRMKNEFGVWEIFLNNADGSSPIPHGSRVVRMETPSGIKDSIPAMIKYSVQAAGEIPYNGIYDPPPEEKY
T1-Homo #35-A1/A2 201 VTYREKAPGAHSAALVDFNNWPNADRMKNEFGVWEIFLNNADGSSPIPHGSRVVRMETPSGIKDSIPAMIKYSVQAAGEIPYNGIYDPPPEEKY
T1-Homo #46-A1 201 VTYREKAPGAHSAALVDFNNWPNADRMKNEFGVWEIFLNNADGSSPIPHGSRVVRMETPSGIKDSIPAMIKYSVQAAGEIPYNGIYDPPPEEKY
T1-Homo #46-A2 201 VTYREKAPGAHSAALVDFNNWPNADRMKNEFGVWEIFLNNADGSSPIPHGSRVVRMETPSGIKDSIPAMIKYSVQAAGEIPYNGIYDPPPEEKY
T2-Homo #35-A1/A2 201 VTYREKAPGAHSAALVDFNNWPNADRMKNEFGVWEIFLNNADGSSPIPHGSRVVRMETPSGIKDSIPAMIKYSVQAAGEIPYNGIYDPPPEEKY
T2-Homo #46-A1 201 VTYREKAPGAHSAALVDFNNWPNADRMKNEFGVWEIFLNNADGSSPIPHGSRVVRMETPSGIKDSIPAMIKYSVQAAGEIPYNGIYDPPPEEKY
T2-Homo #46-A2 201 VTYREKAPGAHSAALVDFNNWPNADRMKNEFGVWEIFLNNADGSSPIPHGSRVVRMETPSGIKDSIPAMIKYSVQAAGEIPYNGIYDPPPEEKY

Wild-type (IRRI154) 301 IFKHQPQKPKSLRIYETHVMSSTEPIKINTYANFRDEVLPRIKLGYNVAVQIMAIQEHAYYGSFGYHVTNFFAPSSRFPTPELKSIDKHAHELGLVVL
T1-Homo #35-A1/A2 301 IFKHQPQKPKSLRIYETHVMSSTEPIKINTYANFRDEVLPRIKLGYNVAVQIMAIQEHAYYGSFGYHVTNFFAPSSRFPTPELKSIDKHAHELGLVVL
T1-Homo #46-A1 301 IFKHQPQKPKSLRIYETHVMSSTEPIKINTYANFRDEVLPRIKLGYNVAVQIMAIQEHAYYGSFGYHVTNFFAPSSRFPTPELKSIDKHAHELGLVVL
T1-Homo #46-A2 301 IFKHQPQKPKSLRIYETHVMSSTEPIKINTYANFRDEVLPRIKLGYNVAVQIMAIQEHAYYGSFGYHVTNFFAPSSRFPTPELKSIDKHAHELGLVVL
T2-Homo #35-A1/A2 301 IFKHQPQKPKSLRIYETHVMSSTEPIKINTYANFRDEVLPRIKLGYNVAVQIMAIQEHAYYGSFGYHVTNFFAPSSRFPTPELKSIDKHAHELGLVVL
T2-Homo #46-A1 301 IFKHQPQKPKSLRIYETHVMSSTEPIKINTYANFRDEVLPRIKLGYNVAVQIMAIQEHAYYGSFGYHVTNFFAPSSRFPTPELKSIDKHAHELGLVVL
T2-Homo #46-A2 301 IFKHQPQKPKSLRIYETHVMSSTEPIKINTYANFRDEVLPRIKLGYNVAVQIMAIQEHAYYGSFGYHVTNFFAPSSRFPTPELKSIDKHAHELGLVVL

Wild-type (IRRI154) 401 MDVVHSHASNNLDGLNGFDGTDTHYFHSGRGHHMWDRLFNYNWVEVLRFLSNARWLEEKYDFDGRFDGVTSMYTHHGLQVAFNTGNYSEYGFPA
T1-Homo #35-A1/A2 401 MDVVHSHASNNLDGLNGFDGTDTHYFHSGRGHHMWDRLFNYNWVEVLRFLSNARWLEEKYDFDGRFDGVTSMYTHHGLQVAFNTGNYSEYGFPA
T1-Homo #46-A1 401 MDVVHSHASNNLDGLNGFDGTDTHYFHSGRGHHMWDRLFNYNWVEVLRFLSNARWLEEKYDFDGRFDGVTSMYTHHGLQVAFNTGNYSEYGFPA
T1-Homo #46-A2 401 MDVVHSHASNNLDGLNGFDGTDTHYFHSGRGHHMWDRLFNYNWVEVLRFLSNARWLEEKYDFDGRFDGVTSMYTHHGLQVAFNTGNYSEYGFPA
T2-Homo #35-A1/A2 401 MDVVHSHASNNLDGLNGFDGTDTHYFHSGRGHHMWDRLFNYNWVEVLRFLSNARWLEEKYDFDGRFDGVTSMYTHHGLQVAFNTGNYSEYGFPA
T2-Homo #46-A1 401 MDVVHSHASNNLDGLNGFDGTDTHYFHSGRGHHMWDRLFNYNWVEVLRFLSNARWLEEKYDFDGRFDGVTSMYTHHGLQVAFNTGNYSEYGFPA
T2-Homo #46-A2 401 MDVVHSHASNNLDGLNGFDGTDTHYFHSGRGHHMWDRLFNYNWVEVLRFLSNARWLEEKYDFDGRFDGVTSMYTHHGLQVAFNTGNYSEYGFPA

Wild-type (IRRI154) 501 TDADAVVYMLVNDLIHGLYPEATTIGEDVSMPTFALFVQDGGVGFDFYRLHMAVDPKWLELLKAKSDSDESMRMDIVHLLTRHRSKCVTAESHQQAVL
T1-Homo #35-A1/A2 501 TDADAVVYMLVNDLIHGLYPEATTIGEDVSMPTFALFVQDGGVGFDFYRLHMAVDPKWLELLKAK-----
T1-Homo #46-A1 501 TDADAVVYMLVNDLIHGLYPEATTIGEDVSMPTFALFVQDGGVGFDFYRLHMAVDPKWLELLKAK-----
T1-Homo #46-A2 501 TDADAVVYMLVNDLIHGLYPEATTIGEDVSMPTFALFVQDGGVGFDFYRLHMAVDPKWLELLKAK-----
T2-Homo #35-A1/A2 501 TDADAVVYMLVNDLIHGLYPEATTIGEDVSMPTFALFVQDGGVGFDFYRLHMAVDPKWLELLKAK-----
T2-Homo #46-A1 501 TDADAVVYMLVNDLIHGLYPEATTIGEDVSMPTFALFVQDGGVGFDFYRLHMAVDPKWLELLKAK-----
T2-Homo #46-A2 501 TDADAVVYMLVNDLIHGLYPEATTIGEDVSMPTFALFVQDGGVGFDFYRLHMAVDPKWLELLKAK-----

Wild-type (IRRI154) 601 GORTIAFWLMDKMYDFMADRATPSIDRGLALHKMRLITMGLGEGYLFMNGNEFGHPENIDFPRAQVLLNGKFIIPGNNSYDKCRRRFDLGDADY
T1-Homo #35-A1/A2 566 -----
T1-Homo #46-A1 566 -----
T1-Homo #46-A2 566 -----
T2-Homo #35-A1/A2 566 -----
T2-Homo #46-A1 566 -----
T2-Homo #46-A2 566 -----

Wild-type (IRRI154) 701 LRYRGMLEFDRAMQSLSEKYGPMTSDHQYISRKHEDDKMIIFEKGDVVFVNFHWSNSYFDYRVGCLKPKGRYVVLDSADLFGGFGRIHHTAEHFTADC
T1-Homo #35-A1/A2 566 -----
T1-Homo #46-A1 566 -----
T1-Homo #46-A2 566 -----
T2-Homo #35-A1/A2 566 -----
T2-Homo #46-A1 566 -----
T2-Homo #46-A2 566 -----

Wild-type (IRRI154) 801 SHDRPFSVSVSPSRVCVWYAPAE
T1-Homo #35-A1/A2 566 -----
T1-Homo #46-A1 566 -----
T1-Homo #46-A2 566 -----
T2-Homo #35-A1/A2 566 -----
T2-Homo #46-A1 566 -----
T2-Homo #46-A2 566 -----

```

**Supplementary Figure 8.** Multiple sequence alignment of putative OsSBEIIb amino acids from the CRISPR/Cas9-induced KO lines of T1 and T2 seeds in comparison to wild-type of IRR154 background.

**Table S1.1.** Genomic regions identified significantly associated with amylose content based on QTL-seq of F2-derived F3 RILs and QTL analysis of F5-derived F6 RILs complemented with targeted association analysis (TGA)

| Method       | QTL              | Chr | Physical Position (Mb) | G' value or LOD score | Overlapping gene      | Gene Name / Putative functions                                              | PVE of significant SNPs after TGA |
|--------------|------------------|-----|------------------------|-----------------------|-----------------------|-----------------------------------------------------------------------------|-----------------------------------|
| QTL-seq      | <i>qseqAC1.1</i> | 1   | 6.02-6.18              | 6.81- 6.82            | LOC_Os01g11250        | <i>OsKAT2 (SHAKER POTASSIUM CHANNEL 2)</i>                                  |                                   |
|              |                  |     |                        |                       | LOC_Os01g11260        | Phospho-N-acetylmuramoyl-pentapeptide- transferase                          |                                   |
|              |                  |     |                        |                       | LOC_Os01g12440        | <i>OsERF53/AP2 (Ethylene Response Factor 53)</i>                            |                                   |
|              |                  |     |                        |                       | LOC_Os01g12580        | <i>OsEnS-2; Late embryogenesis abundant protein 5</i>                       |                                   |
| QTL-seq      | <i>qseqAC2.1</i> | 2   | 7.74-8.61              | 14.21-16.07           | LOC_Os02g14730        | <i>OsLG1 (LARGE GRAIN 1)</i>                                                |                                   |
|              |                  |     |                        |                       | LOC_Os02g14770        | <i>PEPC-1; glycolysis cytosolic branch (PEPC)</i>                           |                                   |
|              |                  |     |                        |                       | LOC_Os02g14840        | <i>OsKAT3 (SHAKER POTASSIUM CHANNEL 3);</i>                                 |                                   |
|              |                  |     |                        |                       | LOC_Os02g14900        | 1,3-beta-glucan synthase component domain containing protein                |                                   |
|              |                  |     |                        |                       | <b>LOC_Os02g14980</b> | <i>OsEFCAX2; Na<sup>+</sup>/Ca<sup>2+</sup> Exchanger 4</i>                 |                                   |
|              |                  |     |                        |                       | <b>LOC_Os02g15070</b> | <i>Glutelin B6; OsEnS-32</i>                                                |                                   |
|              |                  |     |                        |                       | <b>LOC_Os02g15080</b> | <i>RING-type E3 ubiquitin ligase 55</i>                                     |                                   |
|              |                  |     |                        |                       | LOC_Os02g15350        | <i>OsEnS-34/OsDOF3; prolamin box binding factor</i>                         |                                   |
| QTL-seq, TGA | <i>qseqAC2.2</i> | 2   | 17.15-19.95            | 15.00-20.57           | <b>LOC_Os02g28970</b> | <i>Microspore and tapetum regulator 1; secretory fasciclin glycoprotein</i> |                                   |
|              |                  |     |                        |                       | <b>LOC_Os02g29000</b> | <i>Germin-like protein 2-1</i>                                              |                                   |
|              |                  |     |                        |                       | <b>LOC_Os02g29010</b> | <i>Germin-like protein 2-2</i>                                              |                                   |
|              |                  |     |                        |                       | <b>LOC_Os02g29020</b> | <i>Germin-like protein 2-3</i>                                              |                                   |
|              |                  |     |                        |                       | <b>LOC_Os02g29040</b> | <i>Ankyrin 1</i>                                                            |                                   |

|  |  |  |  |  |                       |                                                                                                    |       |
|--|--|--|--|--|-----------------------|----------------------------------------------------------------------------------------------------|-------|
|  |  |  |  |  | <b>LOC_Os02g29070</b> | <i>Probable cyclin-dependent/tyrosine/lipopolysaccharide kinase-domain containing protein</i>      | 18.02 |
|  |  |  |  |  | <b>LOC_Os02g29110</b> | <i>TPR2 (TPR: Tetratricopeptide repeat-containing protein; ankyrin repeat family protein)</i>      |       |
|  |  |  |  |  | <b>LOC_Os02g29130</b> | <i>TPR42 (ankyrin repeat family protein)</i>                                                       |       |
|  |  |  |  |  | <b>LOC_Os02g29140</b> | <i>TPR43 (ankyrin repeat family protein)</i>                                                       | 16.48 |
|  |  |  |  |  | <b>LOC_Os02g29150</b> | <i>OsRALyase (Ribosomal RNA apurinic site specific lyase)</i>                                      | 8.75  |
|  |  |  |  |  | <b>LOC_Os02g29160</b> | <i>TPR45 (ankyrin repeat family protein)</i>                                                       |       |
|  |  |  |  |  | <b>LOC_Os02g29190</b> | <i>TPR46 (ankyrin repeat family protein)</i>                                                       |       |
|  |  |  |  |  | <b>LOC_Os02g29210</b> | <i>Ankyrin 2/TPR47</i>                                                                             | 14.44 |
|  |  |  |  |  | <b>LOC_Os02g29340</b> | <i>Heat stress transcription factor A5</i>                                                         |       |
|  |  |  |  |  | <b>LOC_Os02g29370</b> | <i>Mariner sub-class transposon</i>                                                                | 15.3  |
|  |  |  |  |  | <b>LOC_Os02g29530</b> | <i>Galacturonosyltransferase 13</i>                                                                |       |
|  |  |  |  |  | <b>LOC_Os02g29550</b> | <i>P2/EREBP13 (ethylene response factor 140)</i>                                                   |       |
|  |  |  |  |  | <b>LOC_Os02g29960</b> | <i>Flavonoid 3'-hydroxylase 2</i>                                                                  |       |
|  |  |  |  |  | <b>LOC_Os02g30210</b> | <i>Galactose oxidase beta propeller</i>                                                            | 12.7  |
|  |  |  |  |  | <b>LOC_Os02g30940</b> | <i>Uncharacterized DUF1677</i>                                                                     | 17.1  |
|  |  |  |  |  | <b>LOC_Os02g30840</b> | <i>Amino acid activation pseudouridylylate synthase</i>                                            | 11.92 |
|  |  |  |  |  | <b>LOC_Os02g32610</b> | <i>CONSTITUTIVE TRIPLE-RESPONSE 2; heading date and yield</i>                                      | 19.44 |
|  |  |  |  |  | <b>LOC_Os02g32660</b> | <i>OsSBEIIb: Major CHO metabolism-starch synthesis/branching</i>                                   | 59.14 |
|  |  |  |  |  | <b>LOC_Os02g32730</b> | <i>OsNIN3 (neutral/alkaline invertase 3); Major CHO metabolism-degradation, sucrose invertases</i> |       |
|  |  |  |  |  | <b>LOC_Os02g33110</b> | <i>CIN1: Cell-wall invertase 1; Major</i>                                                          | 20.82 |

|              |                  |   |             |             |                       |                                                                                     |       |
|--------------|------------------|---|-------------|-------------|-----------------------|-------------------------------------------------------------------------------------|-------|
|              |                  |   |             |             |                       | CHO metabolism-starch synthesis/branching                                           |       |
| QTL analysis | <i>qAC-2.1</i>   | 2 | 18.62-19.95 | 10.92-19.70 | <b>LOC_Os02g31140</b> | <i>OsCFL1 (Curly Flag Leaf 1)</i>                                                   |       |
|              |                  |   |             |             | <b>LOC_Os02g31160</b> | <i>OsMSL11 (trihelix transcription factor)</i>                                      | 18.63 |
|              |                  |   |             |             | <b>LOC_Os02g31210</b> | <i>Putative glycosyltransferase</i>                                                 | 16.48 |
|              |                  |   |             |             | <b>LOC_Os02g31220</b> | <i>Similar to Topoisomerase II-associated protein PAT1 homolog 1</i>                | 16.09 |
|              |                  |   |             |             | <b>LOC_Os02g31290</b> | <i>LARGE1</i>                                                                       |       |
|              |                  |   |             |             | <b>LOC_Os02g31910</b> | <i>High-affinity Potassium(K+) Transporter 19</i>                                   | 21.77 |
|              |                  |   |             |             | <b>LOC_Os02g31940</b> | <i>High-affinity Potassium(K+) Transporter 20</i>                                   | 2.71  |
|              |                  |   |             |             | <b>LOC_Os02g32750</b> | <i>Glycosyltransferase 2</i>                                                        | 16.34 |
|              |                  |   |             |             | <b>LOC_Os02g32840</b> | <i>OsSAP5 (stress-associated protein 5)</i>                                         | 20.56 |
|              |                  |   |             |             | <b>LOC_Os02g32860</b> | <i>OsEnS-38 (poly(ADP-ribose) polymerase 3)</i>                                     | 18.42 |
|              |                  |   |             |             | <b>LOC_Os02g32950</b> | <i>RICE CENTRORADIALIS 2</i>                                                        | 18.24 |
|              |                  |   |             |             | <b>LOC_Os02g33090</b> | <i>Fantastic Four meristem regulator-like protein</i>                               | 19.04 |
|              |                  |   |             |             | <b>LOC_Os02g33110</b> | <i>CIN1: Cell-wall invertase 1; Major CHO metabolism-starch synthesis/branching</i> | 20.82 |
|              |                  |   |             |             | <b>LOC_Os02g33120</b> | <i>Probable protein phosphatase 2C</i>                                              | 18.84 |
|              |                  |   |             |             | <b>LOC_Os02g33140</b> | <i>Similar to 40S ribosomal protein S14</i>                                         | 12.34 |
|              |                  |   |             |             | <b>LOC_Os02g33230</b> | <i>Nucleoside-diphosphate-sugar epimerase</i>                                       | 23.25 |
|              |                  |   |             |             | <b>LOC_Os02g33360</b> | <i>Transposon Ty3-G Gag-Pol polyprotein</i>                                         | 15.5  |
|              |                  |   |             |             | <b>LOC_Os02g33450</b> | <i>2-Cys peroxiredoxin BAS1</i>                                                     |       |
|              |                  |   |             |             | <b>LOC_Os02g33550</b> | <i>Late embryogenesis abundant protein</i>                                          |       |
| QTL-seq      | <i>qseqAC2.3</i> | 2 | 20.72-      | 19.81-      | <b>LOC_Os02g34560</b> | <i>OsNIN8 (neutral/alkaline invertase</i>                                           |       |

|         |                  |   |             |           |                       |                                                                                                |       |
|---------|------------------|---|-------------|-----------|-----------------------|------------------------------------------------------------------------------------------------|-------|
|         |                  |   | 21.90       | 20.42     |                       | 8); Major CHO metabolism-degradation, sucrose invertases                                       |       |
|         |                  |   |             |           | <b>LOC_Os02g34630</b> | <i>MYB-related transcription factor</i>                                                        | 11.8  |
|         |                  |   |             |           | LOC_Os02g36140        | OsKS7 (terpene synthase; ent-kaurene synthase7)                                                |       |
|         |                  |   |             |           | LOC_Os02g36210        | OsCPS2 (ent-kaurene synthase; hormone metabolism- gibberellin synthesis)                       | 11.64 |
|         |                  |   |             |           | LOC_Os02g36220        | OsKS5 (ent-kaurene synthase; hormone metabolism-gibberellin synthesis/degradation)             | 13.22 |
|         |                  |   |             |           | LOC_Os02g36264        | OsKS6 (ent-kaurene synthase; hormone metabolism-gibberellin synthesis/degradation)             |       |
|         |                  |   |             |           | LOC_Os02g51070        | <i>Starch synthase-IIb</i>                                                                     |       |
|         |                  |   |             |           | LOC_Os02g51320        | <i>Positive Regulator of Grain Length 2</i>                                                    |       |
| QTL-seq | <i>qseqAC6.1</i> | 6 | 28.83-29.67 | 7.31-7.64 | LOC_Os06g47620        | AH7 (AMIDOHYDROLASE 7; Hormone metabolism-auxin synthesis/degradation)                         |       |
|         |                  |   |             |           | LOC_Os06g48040        | OsMAR1 (microtubule-associated RING finger protein 1; protein degradation-ubiquitin E3-RING)   |       |
|         |                  |   |             |           | LOC_Os06g48640        | RPN1B (19S REGULATORY PARTICLE NON-ATPASE SUBUNIT 1B; regulation of protein catabolic process) |       |
|         |                  |   |             |           | LOC_Os06g48950        | ARF7A (AUXIN RESPONSE FACTOR 7A; transcription regulation-ARF)                                 |       |

**Table S1.2. Genomic regions/QTLs significantly associated with grain protein content based on QTL-seq of F2-derived F3 RILs and QTL analysis of F5-derived F6 RILs complemented with targeted association analysis (TGA).**

| Method            | QTL              | Chr | Physical Position (Mb) | G' value or LOD score | Overlapping gene      | Gene Name / Putative functions                                                                  | PVE of significant SNPs filtered after TGA |      |
|-------------------|------------------|-----|------------------------|-----------------------|-----------------------|-------------------------------------------------------------------------------------------------|--------------------------------------------|------|
| QTL-seq, TGA      | <i>qseqPC2.1</i> | 2   | 7.06-8.44              | 9.00-9.03             | LOC_Os02g13560        | Tonoplast monosaccharide transporter 2                                                          | 4.08                                       |      |
|                   |                  |     |                        |                       | LOC_Os02g13840        | Citrate synthase                                                                                |                                            |      |
|                   |                  |     |                        |                       | LOC_Os02g13810        | <i>Human enhancer of invasion 10</i> ; pollination, fertility, reciprocal meiotic recombination |                                            | 3.41 |
|                   |                  |     |                        |                       | <b>LOC_Os02g14980</b> | <i>OsEFCAX2</i> ; Na <sup>+</sup> /Ca <sup>2+</sup> Exchanger 4                                 |                                            |      |
|                   |                  |     |                        |                       | <b>LOC_Os02g15070</b> | <i>Glutelin B6</i> ; <i>OsEnS-32</i>                                                            |                                            |      |
|                   |                  |     |                        |                       | LOC_Os02g15090        | <i>Glutelin D</i>                                                                               |                                            |      |
|                   |                  |     |                        |                       | LOC_Os02g15150        | <i>Glutelin 7</i>                                                                               |                                            |      |
| QTL-analysis, TGA | <i>qPC2.1</i>    | 2   | 10.13-10.33            | >3.009                | LOC_Os02g17620        | Isochorismatase                                                                                 | 3.28                                       |      |
| QTL-seq           | <i>qseqPC2.2</i> | 2   | 15.01-20.20            | 7.60-9.06             | LOC_Os02g25860        | <i>Glutelin A</i>                                                                               | 3.83                                       |      |
|                   |                  |     |                        |                       | <b>LOC_Os02g25930</b> | <i>Retrotransposon</i>                                                                          |                                            |      |
|                   |                  |     |                        |                       | LOC_Os02g26160        | <i>ABNORMAL POLLEN 1</i>                                                                        |                                            |      |
|                   |                  |     |                        |                       | LOC_Os02g26290        | <i>Fasciclin-like arabinogalactan protein 22</i>                                                |                                            |      |
|                   |                  |     |                        |                       | LOC_Os02g26320        | <i>Fasciclin-like arabinogalactan protein 20</i>                                                |                                            |      |
|                   |                  |     |                        |                       | LOC_Os02g26650        | <i>OsDHCR7 (7-dehydrocholesterol reductase)</i>                                                 |                                            |      |
|                   |                  |     |                        |                       | LOC_Os02g26800        | <i>Aminotransferase-like, plant mobile domain containing protein</i>                            |                                            |      |
|                   |                  |     |                        |                       | <b>LOC_Os02g26840</b> | <i>Membrane-bound O-acyltransferase; similar to Wax synthase</i>                                |                                            | 3.04 |

|  |  |  |  |  |                       |                                                                                                |      |
|--|--|--|--|--|-----------------------|------------------------------------------------------------------------------------------------|------|
|  |  |  |  |  |                       | <i>isoform 1)</i>                                                                              |      |
|  |  |  |  |  | <b>LOC_Os02g27000</b> | <i>Microchidia protein 4</i>                                                                   | 5.51 |
|  |  |  |  |  | <b>LOC_Os02g27030</b> | <i>Cysteine proteinase 1 precursor</i>                                                         | 2.64 |
|  |  |  |  |  | <b>LOC_Os02g28420</b> | <i>OsFBK7; Galactose oxidase, beta-propeller</i>                                               | 4.24 |
|  |  |  |  |  | <b>LOC_Os02g28580</b> | <i>OsEnS-37</i>                                                                                |      |
|  |  |  |  |  | <b>LOC_Os02g28970</b> | <i>Microspore and tapetum regulator 1</i>                                                      |      |
|  |  |  |  |  | <b>LOC_Os02g29000</b> | <i>Germin-like protein 2-1</i>                                                                 |      |
|  |  |  |  |  | <b>LOC_Os02g29010</b> | <i>Germin-like protein 2-2</i>                                                                 |      |
|  |  |  |  |  | <b>LOC_Os02g29020</b> | <i>Germin-like protein 2-3</i>                                                                 |      |
|  |  |  |  |  | <b>LOC_Os02g29040</b> | <i>Ankyrin 1</i>                                                                               |      |
|  |  |  |  |  | <b>LOC_Os02g29070</b> | <i>Probable cyclin-dependent/tyrosine/lipopolysaccharide kinase-domain containing protein)</i> | 5.03 |
|  |  |  |  |  | <b>LOC_Os02g29110</b> | <i>TPR2 (TPR: Tetratricopeptide repeat-containing protein; ankyrin repeat family protein)</i>  |      |
|  |  |  |  |  | <b>LOC_Os02g29130</b> | <i>TPR42 (ankyrin repeat family protein)</i>                                                   |      |
|  |  |  |  |  | <b>LOC_Os02g29140</b> | <i>TPR43 (ankyrin repeat family protein)</i>                                                   | 3.62 |
|  |  |  |  |  | <b>LOC_Os02g29150</b> | <i>OsRALyase (Ribosomal RNA apurinic site specific lyase)</i>                                  |      |
|  |  |  |  |  | <b>LOC_Os02g29160</b> | <i>TPR45 (ankyrin repeat family protein)</i>                                                   |      |
|  |  |  |  |  | <b>LOC_Os02g29190</b> | <i>TPR46 (ankyrin repeat family protein)</i>                                                   |      |
|  |  |  |  |  | <b>LOC_Os02g29210</b> | <i>Ankyrin 2/TPR47</i>                                                                         |      |
|  |  |  |  |  | <b>LOC_Os02g29340</b> | <i>Heat stress transcription factor A5</i>                                                     |      |
|  |  |  |  |  | <b>LOC_Os02g29370</b> | <i>Mariner sub-class transposon</i>                                                            | 5.61 |
|  |  |  |  |  | <b>LOC_Os02g29530</b> | <i>Galacturonosyltransferase 13</i>                                                            |      |
|  |  |  |  |  | <b>LOC_Os02g29550</b> | <i>AP2/EREBP13 (ethylene response factor 140)</i>                                              |      |

|  |  |  |  |  |                       |                                                                      |      |
|--|--|--|--|--|-----------------------|----------------------------------------------------------------------|------|
|  |  |  |  |  | <b>LOC_Os02g29960</b> | <i>Flavonoid 3'-hydroxylase 2</i>                                    |      |
|  |  |  |  |  | LOC_Os02g30714        | <i>Short chain dehydrogenase/reductase (SDR)</i>                     |      |
|  |  |  |  |  | <b>LOC_Os02g30840</b> | <i>Amino acid activation pseudouridylate synthase</i>                |      |
|  |  |  |  |  | <b>LOC_Os02g30940</b> | <i>Uncharacterized DUF1677</i>                                       | 3.96 |
|  |  |  |  |  | LOC_Os02g30630        | <i>Acetolactate synthase 1</i>                                       |      |
|  |  |  |  |  | <b>LOC_Os02g30210</b> | <i>Galactose oxidase beta propeller</i>                              | 4.63 |
|  |  |  |  |  | <b>LOC_Os02g31140</b> | <i>OsCFL1 (Curly Flag Leaf 1)</i>                                    |      |
|  |  |  |  |  | <b>LOC_Os02g31160</b> | <i>OsMSL11 (trihelix transcription factor)</i>                       |      |
|  |  |  |  |  | <b>LOC_Os02g31210</b> | <i>Putative glycosyltransferase</i>                                  |      |
|  |  |  |  |  | <b>LOC_Os02g31220</b> | <i>Similar to Topoisomerase II-associated protein PAT1 homolog 1</i> |      |
|  |  |  |  |  | <b>LOC_Os02g31290</b> | <i>LARGE1</i>                                                        |      |
|  |  |  |  |  | <b>LOC_Os02g31910</b> | <i>High-affinity Potassium(K+) Transporter 19</i>                    |      |
|  |  |  |  |  | <b>LOC_Os02g31940</b> | <i>High-affinity Potassium(K+) Transporter 20</i>                    | 1.92 |
|  |  |  |  |  | LOC_Os02g32060        | <i>Nudix Hydrolase 12</i>                                            |      |
|  |  |  |  |  | <b>LOC_Os02g32610</b> | <i>CONSTITUTIVE TRIPLE-RESPONSE 2; heading date and yield</i>        |      |
|  |  |  |  |  | <b>LOC_Os02g32750</b> | <i>Glycosyltransferase 2</i>                                         |      |
|  |  |  |  |  | LOC_Os02g32430        | <i>TRANSPARENT TESTA GLABRA 1B</i>                                   |      |
|  |  |  |  |  | LOC_Os02g32520        | <i>OsERD1</i>                                                        |      |
|  |  |  |  |  | <b>LOC_Os02g32660</b> | <i>Starch branching enzyme 3</i>                                     | 7.94 |
|  |  |  |  |  | <b>LOC_Os02g32730</b> | <i>OsNIN3 (neutral/alkaline invertase 3); major CHO metabolism</i>   |      |
|  |  |  |  |  | <b>LOC_Os02g32840</b> | <i>OsSAP5 (stress-associated protein 5)</i>                          |      |
|  |  |  |  |  | <b>LOC_Os02g32860</b> | <i>OsEnS-38 (poly(ADP-ribose))</i>                                   |      |



|         |                   |   |             |             |                       |                                                                                     |  |
|---------|-------------------|---|-------------|-------------|-----------------------|-------------------------------------------------------------------------------------|--|
|         |                   |   |             |             |                       | <i>polymerase 3)</i>                                                                |  |
|         |                   |   |             |             | <b>LOC_Os02g32950</b> | <i>RICE CENTRORADIALIS 2</i>                                                        |  |
|         |                   |   |             |             | LOC_Os02g32980        | <i>Germin-like protein 2-4</i>                                                      |  |
|         |                   |   |             |             | <b>LOC_Os02g33090</b> | <i>Fantastic Four meristem regulator-like protein</i>                               |  |
|         |                   |   |             |             | <b>LOC_Os02g33110</b> | <i>CIN1: Cell-wall invertase 1; Major CHO metabolism-starch synthesis/branching</i> |  |
|         |                   |   |             |             | <b>LOC_Os02g33120</b> | <i>Probable protein phosphatase 2C</i>                                              |  |
|         |                   |   |             |             | <b>LOC_Os02g33140</b> | <i>Similar to 40S ribosomal protein S14</i>                                         |  |
|         |                   |   |             |             | <b>LOC_Os02g33230</b> | <i>Nucleoside-diphosphate-sugar epimerase</i>                                       |  |
|         |                   |   |             |             | <b>LOC_Os02g33360</b> | <i>Transposon Ty3-G Gag-Pol polyprotein</i>                                         |  |
|         |                   |   |             |             | <b>LOC_Os02g33450</b> | <i>2-Cys peroxiredoxin BAS1</i>                                                     |  |
|         |                   |   |             |             | <b>LOC_Os02g33550</b> | <i>Late embryogenesis abundant protein 14</i>                                       |  |
|         |                   |   |             |             | LOC_Os02g33580        | <i>Digalactosyldiacylglycerol synthase 1</i>                                        |  |
|         |                   |   |             |             | LOC_Os02g33600        | <i>Valine-glutamine protein 8</i>                                                   |  |
|         |                   |   |             |             |                       | <i>Green-revertible yellow79</i>                                                    |  |
|         |                   |   |             |             | LOC_Os02g33610        | <i>Myb/SANT-LIKE 12; Putative metallo-beta-lactamase-trihelix chimera</i>           |  |
| QTL-seq | <i>qseqPC-2.3</i> | 2 | 20.71-21.37 | 10.32-10.48 | <b>LOC_Os02g34560</b> | <i>OsNIN8 (major CHO metabolism degradation sucrose invertases neutral)</i>         |  |
|         |                   |   |             |             | <b>LOC_Os02g34630</b> | <i>MYB-related transcription factor</i>                                             |  |
|         |                   |   |             |             | LOC_Os02g34990        | <i>Amino acid-binding ACT domain containing protein</i>                             |  |
|         |                   |   |             |             | LOC_Os02g35020        | <i>OsPGSIP-A3 (Plant glycogenin-like starch initiation protein A3)</i>              |  |
| QTL-seq | <i>qseqPC3.1</i>  | 3 | 0.41-0.95   | 10.34-11.32 | LOC_Os03g01880        | <i>LOG LIKE phosphoribohydrolase 3</i>                                              |  |
|         |                   |   |             |             | LOC_Os03g01890        | <i>OsHOX10/LATERAL FLORET 1</i>                                                     |  |

|                                                   |                  |   |             |           |                |                                                                                                                                         |  |
|---------------------------------------------------|------------------|---|-------------|-----------|----------------|-----------------------------------------------------------------------------------------------------------------------------------------|--|
| QTL-seq                                           | <i>qseqPC4.1</i> | 4 | 31.69       | 5.39      | LOC_Os04g53210 | <i>OsGLO3 (Glycolate oxidase 3)</i>                                                                                                     |  |
| QTL-seq                                           | <i>qseqPC5.1</i> | 5 | 0.86-1.00   | 5.95-5.99 | LOC_Os05g02500 | <i>GSN1 (Grain size and number 1)</i>                                                                                                   |  |
|                                                   |                  |   |             |           | LOC_Os05g02770 | <i>Glycine-rich cell-wall structural protein 1; Regulation of grain size and accumulation of seed storage protein and lipids</i>        |  |
| QTL-seq                                           | <i>qseqPC8.1</i> | 8 | 3.50-4.06   | 8.88-9.18 | LOC_Os08g06380 | <i>Cellulose synthase-like family F6; Nucleotide-diphospho-sugar transferase</i>                                                        |  |
|                                                   |                  |   |             |           | LOC_Os08g06550 | <i>Acyl-CoA-binding protein</i>                                                                                                         |  |
|                                                   |                  |   |             |           | LOC_Os08g06630 | <i>Yellow-Green Leaf 13</i>                                                                                                             |  |
|                                                   |                  |   |             |           | LOC_Os08g07010 | <i>ATP-binding cassette transporter (control of long-distance transport of cytokinins from root to shoot; promotion of grain yield)</i> |  |
| QTL-seq                                           | <i>qseqPC8.2</i> | 8 | 20.65-21.31 | 6.50-7.08 | LOC_Os08g33200 | <i>1-phosphatidylinositol-4-phosphate 5-kinase (cellular protein metabolic process)</i>                                                 |  |
|                                                   |                  |   |             |           | LOC_Os08g33488 | <i>OsMADS23</i>                                                                                                                         |  |
|                                                   |                  |   |             |           | LOC_Os08g33540 | <i>PLASTID CASEINOLYTIC PROTEASE S1</i>                                                                                                 |  |
|                                                   |                  |   |             |           | LOC_Os08g33620 | <i>Arginine decarboxylase 3</i>                                                                                                         |  |
|                                                   |                  |   |             |           | LOC_Os08g33660 | <i>OsMYB106</i>                                                                                                                         |  |
|                                                   |                  |   |             |           | LOC_Os08g33720 | <i>lactate/malate dehydrogenase</i>                                                                                                     |  |
|                                                   |                  |   |             |           | LOC_Os08g33810 | <i>Lipoate-protein ligase A</i>                                                                                                         |  |
|                                                   |                  |   |             |           | LOC_Os08g33820 | <i>Delayed yellowing1</i>                                                                                                               |  |
|                                                   |                  |   |             |           | LOC_Os08g33830 | <i>Polypyrimidine tract-binding protein</i>                                                                                             |  |
|                                                   |                  |   |             |           | LOC_Os08g33850 | <i>Nucleoside-triphosphatase</i>                                                                                                        |  |
|                                                   |                  |   |             |           | LOC_Os08g33940 | <i>R2R3-MYB Transcription Factor 78</i>                                                                                                 |  |
| Note: Loci in bold font were also associated with |                  |   |             |           |                |                                                                                                                                         |  |

|     |  |  |  |  |  |  |  |
|-----|--|--|--|--|--|--|--|
| AC. |  |  |  |  |  |  |  |
|-----|--|--|--|--|--|--|--|

**Table S2.1 Significant loci associated with apparent amylose content of F2-derived F3 RILs with details of G prime (G'), delta SNP index and P values (only top 20 SNPs are shown)**

| QTL       | CHR | SNP Position | REF | ALT | Gprime     | deltaSNP   | pvalue     | qvalue     | Region                | Effect   | Amino acid change | Overlapping gene |
|-----------|-----|--------------|-----|-----|------------|------------|------------|------------|-----------------------|----------|-------------------|------------------|
| qseqAC1.1 | 1   | 6083091      | A   | C   | 6.82322191 | 0.21428571 | 3.7641E-05 | 0.0004414  | upstream_gene_variant | MODIFIER | -                 | LOC_Os01g11340   |
|           | 1   | 6083105      | A   | G   | 6.82322089 | 0.27759197 | 3.7641E-05 | 0.0004414  | upstream_gene_variant | MODIFIER | -                 | LOC_Os01g11340   |
|           | 1   | 6081178      | G   | A   | 6.82321285 | 0.3122807  | 3.7642E-05 | 0.0004414  | upstream_gene_variant | MODIFIER | -                 | LOC_Os01g11340   |
|           | 1   | 6081160      | A   | T   | 6.82320812 | 0.32246377 | 3.7642E-05 | 0.0004414  | upstream_gene_variant | MODIFIER | -                 | LOC_Os01g11340   |
|           | 1   | 6081158      | A   | T   | 6.82320759 | 0.35869565 | 3.7642E-05 | 0.0004414  | upstream_gene_variant | MODIFIER | -                 | LOC_Os01g11340   |
|           | 1   | 6081150      | G   | A   | 6.82320549 | 0.32712215 | 3.7642E-05 | 0.0004414  | upstream_gene_variant | MODIFIER | -                 | LOC_Os01g11340   |
|           | 1   | 6081129      | A   | T   | 6.82319997 | 0.4637037  | 3.7642E-05 | 0.0004414  | upstream_gene_variant | MODIFIER | -                 | LOC_Os01g11340   |
|           | 1   | 6081119      | T   | C   | 6.82319734 | 0.41666667 | 3.7643E-05 | 0.0004414  | upstream_gene_variant | MODIFIER | -                 | LOC_Os01g11340   |
|           | 1   | 6081100      | C   | G   | 6.82319235 | 0.43333333 | 3.7643E-05 | 0.0004414  | upstream_gene_variant | MODIFIER | -                 | LOC_Os01g11340   |
|           | 1   | 6081048      | G   | A   | 6.82317868 | 0.53571429 | 3.7644E-05 | 0.0004414  | upstream_gene_variant | MODIFIER | -                 | LOC_Os01g11340   |
|           | 1   | 6081034      | G   | A   | 6.823175   | 0.56043956 | 3.7644E-05 | 0.0004414  | upstream_gene_variant | MODIFIER | -                 | LOC_Os01g11340   |
|           | 1   | 6081030      | A   | G   | 6.82317395 | 0.5455665  | 3.7644E-05 | 0.0004414  | upstream_gene_variant | MODIFIER | -                 | LOC_Os01g11340   |
|           | 1   | 6080972      | A   | C   | 6.82315871 | 0.50854701 | 3.7645E-05 | 0.0004414  | upstream_gene_variant | MODIFIER | -                 | LOC_Os01g11340   |
|           | 1   | 6080908      | G   | A   | 6.82314189 | 0.56231884 | 3.7646E-05 | 0.0004414  | upstream_gene_variant | MODIFIER | -                 | LOC_Os01g11340   |
|           | 1   | 6080728      | G   | A   | 6.82309458 | 0.49333333 | 3.7649E-05 | 0.0004414  | upstream_gene_variant | MODIFIER | -                 | LOC_Os01g11340   |
|           | 1   | 6080717      | T   | C   | 6.82309169 | 0.51971326 | 3.7649E-05 | 0.0004414  | upstream_gene_variant | MODIFIER | -                 | LOC_Os01g11340   |
|           | 1   | 6080661      | C   | T   | 6.82307697 | 0.59425287 | 3.765E-05  | 0.0004414  | upstream_gene_variant | MODIFIER | -                 | LOC_Os01g11340   |
|           | 1   | 6080605      | T   | G   | 6.82306226 | 0.51015532 | 3.7651E-05 | 0.0004414  | upstream_gene_variant | MODIFIER | -                 | LOC_Os01g11340   |
|           | 1   | 6080598      | G   | A   | 6.82306042 | 0.48645161 | 3.7651E-05 | 0.0004414  | upstream_gene_variant | MODIFIER | -                 | LOC_Os01g11340   |
|           | 1   | 5712460      | C   | T   | 6.72631023 | 0.265      | 4.4081E-05 | 0.00048907 | upstream_gene_variant | MODIFIER | -                 | LOC_Os01g10680   |

**Table S2.2 Significant loci associated with protein content of F2-derived F3 RILs with details of G prime (G'), delta SNP index and P-values. (Only top 20 are shown)**

| QTL              | CHR | SNP Position | REF | ALT | Gprime | deltaSNP | pvalue     | qvalue     | Region                | Effect   | Amino acid change | Overlapping gene |
|------------------|-----|--------------|-----|-----|--------|----------|------------|------------|-----------------------|----------|-------------------|------------------|
| <i>qseqPC2.1</i> | 2   | 7059407      | C   | A   | 9.0108 | -0.4639  | 1.1115E-06 | 5.1569E-05 | synonymous_variant    | LOW      | -                 | LOC_Os02g13250   |
|                  | 2   | 7059796      | G   | A   | 9.0110 | -0.3111  | 1.1113E-06 | 5.1569E-05 | upstream_gene_variant | MODIFIER | -                 | LOC_Os02g13260   |
|                  | 2   | 7059806      | A   | G   | 9.0110 | -0.2995  | 1.1113E-06 | 5.1569E-05 | upstream_gene_variant | MODIFIER | -                 | LOC_Os02g13260   |
|                  | 2   | 7059809      | A   | G   | 9.0110 | -0.3016  | 1.1113E-06 | 5.1569E-05 | upstream_gene_variant | MODIFIER | -                 | LOC_Os02g13260   |
|                  | 2   | 7059818      | G   | A   | 9.0110 | -0.3137  | 1.1113E-06 | 5.1569E-05 | upstream_gene_variant | MODIFIER | -                 | LOC_Os02g13260   |
|                  | 2   | 7060358      | A   | G   | 9.0112 | -0.6177  | 1.111E-06  | 5.1569E-05 | synonymous_variant    | LOW      | -                 | LOC_Os02g13250   |
|                  | 2   | 7060420      | A   | G   | 9.0112 | -0.5371  | 1.1109E-06 | 5.1569E-05 | upstream_gene_variant | MODIFIER | -                 | LOC_Os02g13260   |
|                  | 2   | 7060421      | G   | A   | 9.0112 | -0.4519  | 1.1109E-06 | 5.1569E-05 | upstream_gene_variant | MODIFIER | -                 | LOC_Os02g13260   |
|                  | 2   | 7060428      | G   | A   | 9.0112 | -0.4881  | 1.1109E-06 | 5.1569E-05 | upstream_gene_variant | MODIFIER | -                 | LOC_Os02g13260   |
|                  | 2   | 7060486      | G   | T   | 9.0112 | -0.3306  | 1.1109E-06 | 5.1569E-05 | upstream_gene_variant | MODIFIER | -                 | LOC_Os02g13260   |
|                  | 2   | 7060559      | C   | T   | 9.0112 | -0.4058  | 1.1109E-06 | 5.1569E-05 | upstream_gene_variant | MODIFIER | -                 | LOC_Os02g13260   |
|                  | 2   | 7060560      | G   | A   | 9.0112 | -0.4375  | 1.1109E-06 | 5.1569E-05 | upstream_gene_variant | MODIFIER | -                 | LOC_Os02g13260   |
|                  | 2   | 7060803      | T   | C   | 9.0113 | -0.4074  | 1.1107E-06 | 5.1569E-05 | upstream_gene_variant | MODIFIER | -                 | LOC_Os02g13260   |
|                  | 2   | 7060814      | A   | G   | 9.0113 | -0.5135  | 1.1107E-06 | 5.1569E-05 | upstream_gene_variant | MODIFIER | -                 | LOC_Os02g13260   |
|                  | 2   | 7060863      | C   | T   | 9.0113 | -0.3551  | 1.1107E-06 | 5.1569E-05 | upstream_gene_variant | MODIFIER | -                 | LOC_Os02g13260   |
|                  | 2   | 7061123      | C   | T   | 9.0114 | -0.2946  | 1.1106E-06 | 5.1569E-05 | upstream_gene_variant | MODIFIER | -                 | LOC_Os02g13260   |
|                  | 2   | 7061126      | A   | G   | 9.0114 | -0.3312  | 1.1106E-06 | 5.1569E-05 | upstream_gene_variant | MODIFIER | -                 | LOC_Os02g13260   |
|                  | 2   | 7061366      | T   | A   | 9.0115 | -0.5369  | 1.1104E-06 | 5.1569E-05 | upstream_gene_variant | MODIFIER | -                 | LOC_Os02g13260   |
|                  | 2   | 7061625      | T   | C   | 9.0116 | -0.5337  | 1.1103E-06 | 5.1569E-05 | upstream_gene_variant | MODIFIER | -                 | LOC_Os02g13260   |

**Table S3. Significant QTLs identified using composite interval mapping of F5-derived F6 recombinant inbred lines.**

| QTL name      | Chr | Region (Mb) | Associated Trait | SNP ID          | LOD score | Position   | locus                                                    | bp       | ref | alt | type_of_aa_change |
|---------------|-----|-------------|------------------|-----------------|-----------|------------|----------------------------------------------------------|----------|-----|-----|-------------------|
| <i>qPC2.1</i> | 2   | 10.13-10.33 | PC               | snp_02_10141997 | 3.0093    | intronic   | LOC_Os02g17620                                           | 10141997 | G   | A   | NA                |
|               |     |             |                  | snp_02_10142042 | 3.0098    | intronic   |                                                          | 10142042 | T   | A   | NA                |
|               |     |             |                  | snp_02_10142047 | 3.0099    | intronic   |                                                          | 10142047 | A   | C   | NA                |
|               |     |             |                  | snp_02_10142051 | 3.0099    | intronic   |                                                          | 10142051 | C   | T   | NA                |
|               |     |             |                  | snp_02_10328456 | 3.5173    | intergenic | LOC_Os02g17840(dist=8445),<br>LOC_Os02g17850(dist=2237)  | 10328456 | A   | C   | NA                |
|               |     |             |                  | snp_02_10328456 | 3.8913    | intergenic | LOC_Os02g17840(dist=8445),<br>LOC_Os02g17850(dist=2237)  | 10328456 | A   | C   | NA                |
| <i>qAC2.1</i> | 2   | 18.62-19.96 | AC               | snp_02_18615462 | 10.9165   | intergenic | LOC_Os02g31120,<br>LOC_Os02g31140                        | NA       | NA  | NA  | NA                |
|               |     |             |                  | snp_02_18615470 | 11.6130   | intergenic |                                                          | NA       | NA  | NA  | NA                |
|               |     |             |                  | snp_02_18615488 | 11.6144   | intergenic |                                                          | NA       | NA  | NA  | NA                |
|               |     |             |                  | snp_02_18615515 | 11.6167   | intergenic |                                                          | NA       | NA  | NA  | NA                |
|               |     |             |                  | snp_02_18615519 | 11.6170   | intergenic |                                                          | NA       | NA  | NA  | NA                |
|               |     |             |                  | snp_02_18624558 | 13.3778   | intergenic |                                                          | NA       | NA  | NA  | NA                |
|               |     |             |                  | snp_02_18637200 | 13.8433   | intergenic | LOC_Os02g31120(dist=28112),<br>LOC_Os02g31140(dist=1936) | 18637200 | C   | T   | NA                |
|               |     |             |                  | snp_02_18660414 | 13.6031   | intronic   | LOC_Os02g31160                                           | 18660414 | T   | C   | NA                |
|               |     |             |                  | snp_02_18694437 | 13.6975   | upstream   | LOC_Os02g31210                                           | 18694437 | C   | T   | NA                |
|               |     |             |                  | snp_02_18711010 | 14.4694   | NA         | NA                                                       | NA       | NA  | NA  | NA                |
|               |     |             |                  | snp_02_18711211 | 14.4708   | exonic     | LOC_Os02g31220                                           | 18711211 | C   | T   | synonymous SNV    |
|               |     |             |                  | snp_02_18752798 | 14.7581   | NA         | NA                                                       | NA       | NA  | NA  | NA                |
|               |     |             |                  | snp_02_18767486 | 14.8544   | intergenic | LOC_Os02g31280(dist=19661),<br>LOC_Os02g31290(dist=2233) | 18767486 | A   | C   | NA                |
|               |     |             |                  | snp_02_18845763 | 16.1763   | exonic     | LOC_Os02g31910                                           | 18845763 | T   | C   | synonymous SNV    |
|               |     |             |                  | snp_02_18845781 | 16.1829   | exonic     | LOC_Os02g31910                                           | 18845781 | G   | T   | synonymous SNV    |
|               |     |             |                  | snp_02_18846101 | 16.6442   | exonic     | LOC_Os02g31910                                           | 18846101 | A   | C   | synonymous SNV    |
|               |     |             |                  | snp_02_18846852 | 15.8462   | exonic     | LOC_Os02g31910                                           | 18846852 | C   | T   | synonymous SNV    |
|               |     |             |                  | snp_02_18848592 | 15.8550   | exonic     | LOC_Os02g31910                                           | 18848592 | A   | G   | synonymous SNV    |
|               |     |             |                  | snp_02_18856082 | 15.0076   | intergenic | LOC_Os02g31910(dist=4240),<br>LOC_Os02g31920(dist=3152)  | 18856082 | G   | A   | NA                |
|               |     |             |                  | snp_02_18871604 | 13.0832   | downstream | LOC_Os02g31940                                           | 18871604 | T   | C   | NA                |

|  |  |  |                 |         |            |                                            |          |    |    |                   |
|--|--|--|-----------------|---------|------------|--------------------------------------------|----------|----|----|-------------------|
|  |  |  | snp_02_18871693 | 13.0838 | downstream | LOC_Os02g31940                             | 18871693 | T  | C  | NA                |
|  |  |  | snp_02_18889427 | 16.6462 | downstream | LOC_Os02g31960                             | 18889427 | T  | C  | NA                |
|  |  |  | snp_02_19028834 | 18.4855 | intronic   | LOC_Os02g32210                             | 19028834 | G  | A  | NA                |
|  |  |  | snp_02_19062328 | 18.7305 | exonic     | LOC_Os02g32280                             | 19062328 | A  | G  | synonymous SNV    |
|  |  |  | snp_02_19163651 | 18.3261 | downstream | LOC_Os02g32410                             | 19163651 | T  | C  | NA                |
|  |  |  | snp_02_19186685 | 18.9878 | exonic     | LOC_Os02g32450                             | 19186685 | A  | G  | synonymous SNV    |
|  |  |  | snp_02_19186913 | 19.3720 | exonic     | LOC_Os02g32450                             | 19186913 | A  | G  | synonymous SNV    |
|  |  |  | snp_02_19262151 | 19.1389 | UTR3       | LOC_Os02g32540(LOC_Os02g32540.1:c.*383T>A) | 19262151 | T  | A  | NA                |
|  |  |  | snp_02_19290185 | 19.6953 | NA         | NA                                         | NA       | NA | NA | NA                |
|  |  |  | snp_02_19304020 | 19.3508 | exonic     | LOC_Os02g32580                             | 19304020 | T  | C  | nonsynonymous SNV |
|  |  |  | snp_02_19304085 | 19.3510 | intronic   | LOC_Os02g32580                             | 19304085 | G  | C  | NA                |
|  |  |  | snp_02_19449660 | 17.7522 | downstream | LOC_Os02g32750                             | 19449660 | A  | G  | NA                |
|  |  |  | snp_02_19449785 | 17.7502 | downstream | LOC_Os02g32750                             | 19449785 | C  | T  | NA                |
|  |  |  | snp_02_19456018 | 18.4127 | intronic   | LOC_Os02g32760                             | 19456018 | A  | G  | NA                |
|  |  |  | snp_02_19487646 | 17.2205 | upstream   | LOC_Os02g32840                             | 19487646 | T  | G  | NA                |
|  |  |  | snp_02_19487768 | 15.1417 | upstream   | LOC_Os02g32840                             | 19487768 | G  | C  | NA                |
|  |  |  | snp_02_19513808 | 16.6774 | exonic     | LOC_Os02g32860                             | 19513808 | C  | A  | synonymous SNV    |
|  |  |  | snp_02_19564705 | 15.3388 | exonic     | LOC_Os02g32940                             | 19564705 | C  | T  | synonymous SNV    |
|  |  |  | snp_02_19564792 | 15.3355 | exonic     | LOC_Os02g32940                             | 19564792 | G  | A  | synonymous SNV    |
|  |  |  | snp_02_19564801 | 15.3352 | exonic     | LOC_Os02g32940                             | 19564801 | G  | A  | synonymous SNV    |
|  |  |  | snp_02_19564806 | 15.3351 | exonic     | LOC_Os02g32940                             | 19564806 | A  | T  | synonymous SNV    |
|  |  |  | snp_02_19568752 | 14.6837 | exonic     | LOC_Os02g32950                             | 19568752 | A  | G  | synonymous SNV    |
|  |  |  | snp_02_19568814 | 14.6837 | UTR5       | LOC_Os02g32950(LOC_Os02g32950.1:c.-18A>T)  | 19568814 | T  | A  | NA                |
|  |  |  | snp_02_19614069 | 13.9317 | UTR5       | LOC_Os02g32990(LOC_Os02g32990.1:c.-178C>G) | 19614069 | C  | G  | NA                |
|  |  |  | snp_02_19654273 | 14.2251 | exonic     | LOC_Os02g33090                             | 19654273 | T  | C  | synonymous SNV    |
|  |  |  | snp_02_19654332 | 14.2243 | exonic     | LOC_Os02g33090                             | 19654332 | G  | T  | synonymous SNV    |
|  |  |  | snp_02_19682485 | 15.1420 | upstream   | LOC_Os02g33110                             | 19682485 | A  | C  | NA                |
|  |  |  | snp_02_19685411 | 14.9157 | exonic     | LOC_Os02g33110                             | 19685411 | A  | C  | synonymous SNV    |
|  |  |  | snp_02_19685437 | 14.9155 | exonic     | LOC_Os02g33110                             | 19685437 | A  | T  | synonymous SNV    |
|  |  |  | snp_02_19685438 | 14.9155 | exonic     | LOC_Os02g33110                             | 19685438 | G  | T  | synonymous SNV    |
|  |  |  | snp_02_19685439 | 14.9155 | exonic     | LOC_Os02g33110                             | 19685439 | C  | T  | synonymous SNV    |
|  |  |  | snp_02_19703249 | 14.3647 | downstream | LOC_Os02g33120                             | 19703249 | C  | T  | NA                |
|  |  |  | snp_02_19713122 | 14.0198 | intronic   | LOC_Os02g33140                             | 19713122 | T  | C  | NA                |

|        |   |             |    |                 |         |                         |                                                          |          |    |    |                |
|--------|---|-------------|----|-----------------|---------|-------------------------|----------------------------------------------------------|----------|----|----|----------------|
|        |   |             |    | snp_02_19747480 | 13.9551 | intergenic              | LOC_Os02g33210(dist=2873),<br>LOC_Os02g33220(dist=1414)  | 19747480 | T  | C  | NA             |
|        |   |             |    | snp_02_19755401 | 13.8661 | downstream              | LOC_Os02g33230                                           | 19755401 | T  | A  | NA             |
|        |   |             |    | snp_02_19764769 | 14.0697 | downstream              | LOC_Os02g33250                                           | 19764769 | C  | T  | NA             |
|        |   |             |    | snp_02_19764801 | 14.0714 | downstream              | LOC_Os02g33250                                           | 19764801 | T  | G  | NA             |
|        |   |             |    | snp_02_19819816 | 14.1633 | upstream                | LOC_Os02g33360                                           | 19819816 | A  | G  | NA             |
|        |   |             |    | snp_02_19819844 | 14.1634 | upstream                | LOC_Os02g33360                                           | 19819844 | A  | C  | NA             |
|        |   |             |    | snp_02_19882260 | 14.3320 | exonic                  | LOC_Os02g33450                                           | 19882260 | G  | C  | synonymous SNV |
|        |   |             |    | snp_02_19884468 | 14.1060 | intronic                | LOC_Os02g33450                                           | 19884468 | T  | A  | NA             |
|        |   |             |    | snp_02_19884473 | 14.1060 | intronic                | LOC_Os02g33450                                           | 19884473 | G  | T  | NA             |
|        |   |             |    | snp_02_19952595 | 15.5417 | intergenic              | LOC_Os02g33540(dist=4225),<br>LOC_Os02g33550(dist=1958)  | 19952595 | T  | A  | NA             |
| qGI1.1 | 1 | 7.68-8.30   | GI | snp_01_7680341  | 3.0481  | intronic                | LOC_Os01g13730                                           | 7680341  | T  | A  | NA             |
|        |   |             |    | snp_01_7743691  | 3.2254  | upstream;dow<br>nstream | LOC_Os01g13810;<br>LOC_Os01g13800                        | 7743691  | G  | C  | NA             |
|        |   |             |    | snp_01_8300940  | 3.0263  | exonic                  | LOC_Os01g14840                                           | 8300940  | T  | C  | synonymous SNV |
| qGI2.1 | 2 | 18.63-19.97 | GI | snp_02_18637200 | 13.9449 | intergenic              | LOC_Os02g31120(dist=28112),<br>LOC_Os02g31140(dist=1936) | 18637200 | C  | T  | NA             |
|        |   |             |    | snp_02_18660414 | 13.6286 | intronic                | LOC_Os02g31160                                           | 18660414 | T  | C  | NA             |
|        |   |             |    | snp_02_18694437 | 13.2933 | upstream                | LOC_Os02g31210                                           | 18694437 | C  | T  | NA             |
|        |   |             |    | snp_02_18711010 | 13.8502 | NA                      | NA                                                       | NA       | NA | NA | NA             |
|        |   |             |    | snp_02_18711211 | 13.8527 | exonic                  | LOC_Os02g31220                                           | 18711211 | C  | T  | synonymous SNV |
|        |   |             |    | snp_02_18752798 | 15.0857 | NA                      | NA                                                       | NA       | NA | NA | NA             |
|        |   |             |    | snp_02_18767486 | 15.3346 | intergenic              | LOC_Os02g31280(dist=19661),<br>LOC_Os02g31290(dist=2233) | 18767486 | A  | C  | NA             |
|        |   |             |    | snp_02_18845763 | 17.2704 | exonic                  | LOC_Os02g31910                                           | 18845763 | T  | C  | synonymous SNV |
|        |   |             |    | snp_02_18845781 | 17.2819 | exonic                  | LOC_Os02g31910                                           | 18845781 | G  | T  | synonymous SNV |
|        |   |             |    | snp_02_18846101 | 17.9607 | exonic                  | LOC_Os02g31910                                           | 18846101 | A  | C  | synonymous SNV |
|        |   |             |    | snp_02_18846852 | 16.7854 | exonic                  | LOC_Os02g31910                                           | 18846852 | C  | T  | synonymous SNV |
|        |   |             |    | snp_02_18848592 | 16.7999 | exonic                  | LOC_Os02g31910                                           | 18848592 | A  | G  | synonymous SNV |
|        |   |             |    | snp_02_18856082 | 16.5213 | intergenic              | LOC_Os02g31910(dist=4240),<br>LOC_Os02g31920(dist=3152)  | 18856082 | G  | A  | NA             |
|        |   |             |    | snp_02_18871604 | 15.5857 | downstream              | LOC_Os02g31940                                           | 18871604 | T  | C  | NA             |
|        |   |             |    | snp_02_18871693 | 15.5862 | downstream              | LOC_Os02g31940                                           | 18871693 | T  | C  | NA             |
|        |   |             |    | snp_02_18889427 | 19.2889 | downstream              | LOC_Os02g31960                                           | 18889427 | T  | C  | NA             |
|        |   |             |    | snp_02_19028834 | 20.4901 | intronic                | LOC_Os02g32210                                           | 19028834 | G  | A  | NA             |
|        |   |             |    | snp_02_19062328 | 20.0805 | exonic                  | LOC_Os02g32280                                           | 19062328 | A  | G  | synonymous SNV |



|  |  |  |                 |         |            |                                                         |          |    |    |                   |
|--|--|--|-----------------|---------|------------|---------------------------------------------------------|----------|----|----|-------------------|
|  |  |  | snp_02_19163651 | 18.6761 | downstream | LOC_Os02g32410                                          | 19163651 | T  | C  | NA                |
|  |  |  | snp_02_19186685 | 19.9661 | exonic     | LOC_Os02g32450                                          | 19186685 | A  | G  | synonymous SNV    |
|  |  |  | snp_02_19186913 | 20.5500 | exonic     | LOC_Os02g32450                                          | 19186913 | A  | G  | synonymous SNV    |
|  |  |  | snp_02_19262151 | 20.9667 | UTR3       | LOC_Os02g32540(LOC_Os02g32540.1:c.*383T>A)              | 19262151 | T  | A  | NA                |
|  |  |  | snp_02_19290185 | 21.7909 | NA         | NA                                                      | NA       | NA | NA | NA                |
|  |  |  | snp_02_19304020 | 22.1614 | exonic     | LOC_Os02g32580                                          | 19304020 | T  | C  | nonsynonymous SNV |
|  |  |  | snp_02_19304085 | 22.1620 | intronic   | LOC_Os02g32580                                          | 19304085 | G  | C  | NA                |
|  |  |  | snp_02_19449660 | 19.8780 | downstream | LOC_Os02g32750                                          | 19449660 | A  | G  | NA                |
|  |  |  | snp_02_19449785 | 19.8764 | downstream | LOC_Os02g32750                                          | 19449785 | C  | T  | NA                |
|  |  |  | snp_02_19456018 | 21.1766 | intronic   | LOC_Os02g32760                                          | 19456018 | A  | G  | NA                |
|  |  |  | snp_02_19487646 | 20.2737 | upstream   | LOC_Os02g32840                                          | 19487646 | T  | G  | NA                |
|  |  |  | snp_02_19487768 | 18.1903 | upstream   | LOC_Os02g32840                                          | 19487768 | G  | C  | NA                |
|  |  |  | snp_02_19513808 | 19.3748 | exonic     | LOC_Os02g32860                                          | 19513808 | C  | A  | synonymous SNV    |
|  |  |  | snp_02_19564705 | 17.1122 | exonic     | LOC_Os02g32940                                          | 19564705 | C  | T  | synonymous SNV    |
|  |  |  | snp_02_19564792 | 17.1093 | exonic     | LOC_Os02g32940                                          | 19564792 | G  | A  | synonymous SNV    |
|  |  |  | snp_02_19564801 | 17.1091 | exonic     | LOC_Os02g32940                                          | 19564801 | G  | A  | synonymous SNV    |
|  |  |  | snp_02_19564806 | 17.1089 | exonic     | LOC_Os02g32940                                          | 19564806 | A  | T  | synonymous SNV    |
|  |  |  | snp_02_19568752 | 16.9065 | exonic     | LOC_Os02g32950                                          | 19568752 | A  | G  | synonymous SNV    |
|  |  |  | snp_02_19568814 | 16.9064 | UTR5       | LOC_Os02g32950(LOC_Os02g32950.1:c.-18A>T)               | 19568814 | T  | A  | NA                |
|  |  |  | snp_02_19614069 | 16.1325 | UTR5       | LOC_Os02g32990(LOC_Os02g32990.1:c.-178C>G)              | 19614069 | C  | G  | NA                |
|  |  |  | snp_02_19654273 | 17.1803 | exonic     | LOC_Os02g33090                                          | 19654273 | T  | C  | synonymous SNV    |
|  |  |  | snp_02_19654332 | 17.1796 | exonic     | LOC_Os02g33090                                          | 19654332 | G  | T  | synonymous SNV    |
|  |  |  | snp_02_19682485 | 17.3465 | upstream   | LOC_Os02g33110                                          | 19682485 | A  | C  | NA                |
|  |  |  | snp_02_19685411 | 16.9319 | exonic     | LOC_Os02g33110                                          | 19685411 | A  | C  | synonymous SNV    |
|  |  |  | snp_02_19685437 | 16.9318 | exonic     | LOC_Os02g33110                                          | 19685437 | A  | T  | synonymous SNV    |
|  |  |  | snp_02_19685438 | 16.9318 | exonic     | LOC_Os02g33110                                          | 19685438 | G  | T  | synonymous SNV    |
|  |  |  | snp_02_19685439 | 16.9318 | exonic     | LOC_Os02g33110                                          | 19685439 | C  | T  | synonymous SNV    |
|  |  |  | snp_02_19703249 | 16.2676 | downstream | LOC_Os02g33120                                          | 19703249 | C  | T  | NA                |
|  |  |  | snp_02_19713122 | 15.4760 | intronic   | LOC_Os02g33140                                          | 19713122 | T  | C  | NA                |
|  |  |  | snp_02_19747480 | 15.4325 | intergenic | LOC_Os02g33210(dist=2873),<br>LOC_Os02g33220(dist=1414) | 19747480 | T  | C  | NA                |
|  |  |  | snp_02_19755401 | 15.3455 | downstream | LOC_Os02g33230                                          | 19755401 | T  | A  | NA                |
|  |  |  | snp_02_19764769 | 15.5479 | downstream | LOC_Os02g33250                                          | 19764769 | C  | T  | NA                |

|  |  |  |  |                 |         |            |                                                         |          |   |   |                |
|--|--|--|--|-----------------|---------|------------|---------------------------------------------------------|----------|---|---|----------------|
|  |  |  |  | snp_02_19764801 | 15.5487 | downstream | LOC_Os02g33250                                          | 19764801 | T | G | NA             |
|  |  |  |  | snp_02_19819816 | 16.2372 | upstream   | LOC_Os02g33360                                          | 19819816 | A | G | NA             |
|  |  |  |  | snp_02_19819844 | 16.2375 | upstream   | LOC_Os02g33360                                          | 19819844 | A | C | NA             |
|  |  |  |  | snp_02_19882260 | 16.7145 | exonic     | LOC_Os02g33450                                          | 19882260 | G | C | synonymous SNV |
|  |  |  |  | snp_02_19884468 | 16.7242 | intronic   | LOC_Os02g33450                                          | 19884468 | T | A | NA             |
|  |  |  |  | snp_02_19884473 | 16.7242 | intronic   | LOC_Os02g33450                                          | 19884473 | G | T | NA             |
|  |  |  |  | snp_02_19952595 | 17.0587 | intergenic | LOC_Os02g33540(dist=4225),<br>LOC_Os02g33550(dist=1958) | 19952595 | T | A | NA             |
|  |  |  |  | snp_02_19966766 | 15.9175 | exonic     | LOC_Os02g33560                                          | 19966766 | C | A | synonymous SNV |

**Table S4.1 Top non-redundant significant SNPs of candidate genes for AC and PC and the corresponding percent phenotypic variation values after targeted association analysis.**

| Trait          | Locus           | Top_predictor_SNP | PVE (%)    | Beta            | SE        | P          | SNP_position   | type_of_aa_change |
|----------------|-----------------|-------------------|------------|-----------------|-----------|------------|----------------|-------------------|
| AC             | LOC_Os02g31940  | snp_02_18871604   | 2.7059     | -0.2496813      | 0.0895939 | 0.0056779  | downstream     | NA                |
|                | LOC_Os02g27820  | snp_02_16470322   | 4.093      | -0.2338043      | 0.1027517 | 0.0236525  | upstream       | NA                |
|                |                 | snp_02_16470423   |            | -0.2548106      | 0.1020179 | 0.0130868  | upstream       | NA                |
|                |                 | snp_02_16473118   |            | -0.2807654      | 0.1051098 | 0.0080112  | intronic       | NA                |
|                |                 | snp_02_16476369   |            | -0.2326566      | 0.0995812 | 0.0201941  | exonic         | nonsynonymous SNV |
|                |                 | LOC_Os02g33790    |            | snp_02_20158379 | 5.566     | -0.2699648 | 0.0858029      | 0.0018176         |
|                | LOC_Os02g31860  | snp_02_18817478   | 5.6418     | -0.271653       | 0.0881512 | 0.0022528  | downstream     | NA                |
|                | LOC_Os02g33680  | snp_02_20082377   | 5.9607     | -0.318248       | 0.0752921 | 3.155E-05  | exonic         | synonymous SNV    |
|                |                 | snp_02_20082383   |            | -0.3269196      | 0.0771692 | 3.031E-05  | exonic         | synonymous SNV    |
|                |                 | snp_02_20082386   |            | -0.3138427      | 0.0767654 | 5.594E-05  | exonic         | synonymous SNV    |
|                |                 | snp_02_20082615   |            | -0.3523073      | 0.0781482 | 9.408E-06  | exonic         | synonymous SNV    |
|                |                 | snp_02_20082638   |            | -0.3307687      | 0.0768051 | 2.253E-05  | exonic         | synonymous SNV    |
|                | LOC_Os02g27570  | snp_02_16328549   | 6.1284     | -0.2095184      | 0.0900559 | 0.0206405  | intronic       | NA                |
|                | LOC_Os02g30640  | snp_02_18240771   | 7.4833     | -0.1923224      | 0.0899662 | 0.0333092  | intronic       | NA                |
|                |                 | snp_02_18240912   |            | -0.2016606      | 0.0929755 | 0.0308332  | intronic       | NA                |
|                |                 | snp_02_18240951   |            | -0.182452       | 0.089563  | 0.0424721  | intronic       | NA                |
|                |                 | snp_02_20037230   | 8.4618     | -0.3596161      | 0.0792434 | 8.272E-06  | downstream     | NA                |
|                | LOC_Os02g29150  | snp_02_17271281   | 8.7481     | -0.2315067      | 0.0925521 | 0.0128555  | UTR3           | NA                |
|                |                 | snp_02_17271333   |            | -0.2297509      | 0.0920955 | 0.0130948  | UTR3           | NA                |
|                | LOC_Os02g27110  | snp_02_15935358   | 9.2727     | -0.2434529      | 0.0927715 | 0.0091051  | exonic         | nonsynonymous SNV |
| LOC_Os02g35020 | snp_02_21016307 | 9.4002            | -0.2145302 | 0.0785878       | 0.0067568 | exonic     | synonymous SNV |                   |
| LOC_Os02g31120 | snp_02_18607827 | 9.5262            | -0.2028861 | 0.0994635       | 0.042354  | intronic   | NA             |                   |
|                | snp_02_18608900 |                   | -0.281371  | 0.0919841       | 0.0024474 | exonic     | synonymous SNV |                   |
| LOC_Os02g26210 | snp_02_15400132 | 10.0115           | -0.2661052 | 0.0928429       | 0.004435  | intergenic | NA             |                   |
|                | snp_02_15400183 |                   | -0.2288284 | 0.0917003       | 0.0130948 | intergenic | NA             |                   |
| LOC_Os02g26480 | snp_02_15558985 | 10.3981           | -0.2631198 | 0.0960642       | 0.0065058 | upstream   | NA             |                   |
| LOC_Os02g34990 | snp_02_20993759 | 10.7379           | -0.1702304 | 0.0742835       | 0.0225741 | exonic     | synonymous SNV |                   |
| LOC_Os02g26404 | snp_02_15512248 | 10.8923           | -0.2196673 | 0.094231        | 0.0203777 | intronic   | NA             |                   |

|                |                 |         |            |           |           |            |                   |
|----------------|-----------------|---------|------------|-----------|-----------|------------|-------------------|
| LOC_Os02g29720 | snp_02_17677857 | 11.0241 | -0.4007358 | 0.1039591 | 0.000143  | exonic     | nonsynonymous SNV |
|                | snp_02_17677866 |         | -0.3921394 | 0.1035425 | 0.0001856 | exonic     | nonsynonymous SNV |
|                | snp_02_17677891 |         | -0.3424444 | 0.1013892 | 0.0008325 | NA         | NA                |
|                | snp_02_17677905 |         | -0.3319083 | 0.1014127 | 0.0011949 | exonic     | synonymous SNV    |
| LOC_Os02g28670 | snp_02_16962209 | 11.3181 | -0.1987687 | 0.0934355 | 0.0341996 | upstream   | A                 |
| LOC_Os02g30114 | snp_02_17889038 | 11.3767 | -0.1822559 | 0.0924387 | 0.0496044 | intronic   | NA                |
| LOC_Os02g36210 | snp_02_21847256 | 11.6421 | -0.2071832 | 0.0790528 | 0.0092248 | exonic     | synonymous SNV    |
| LOC_Os02g34630 | snp_02_20767401 | 11.801  | -0.203963  | 0.0829839 | 0.0145576 | exonic     | synonymous SNV    |
| LOC_Os02g34630 | snp_02_20767410 |         | -0.2171867 | 0.0835944 | 0.0098496 | exonic     | synonymous SNV    |
| LOC_Os02g30840 | snp_02_18385163 | 11.9192 | -0.2171347 | 0.0915202 | 0.0182928 | upstream   | NA                |
| LOC_Os02g28550 | snp_02_16888902 | 11.9425 | -0.1723502 | 0.0854377 | 0.0444975 | upstream   | NA                |
| LOC_Os02g28830 | snp_02_17046347 | 12.0659 | -0.1871919 | 0.0935519 | 0.0462964 | downstream | NA                |
| LOC_Os02g28340 | snp_02_16750570 | 12.1885 | -0.2072022 | 0.0974476 | 0.0342687 | exonic     | synonymous SNV    |
| LOC_Os02g33140 | snp_02_19713122 | 12.3447 | -0.2281211 | 0.0796934 | 0.0045085 | intronic   | NA                |
| LOC_Os02g30210 | snp_02_17959252 | 12.6964 | -0.2223272 | 0.0908844 | 0.0149918 | exonic     | nonsynonymous SNV |
| LOC_Os02g26040 | snp_02_15286516 | 12.8776 | -0.3159265 | 0.0988278 | 0.0015319 | exonic     | synonymous SNV    |
| LOC_Os02g26294 | snp_02_15442082 | 12.9897 | -0.2330438 | 0.1022529 | 0.0233219 | UTR5       | T                 |
| LOC_Os02g26349 | snp_02_15470192 | 13.0041 | -0.23784   | 0.0970422 | 0.0148266 | intronic   | NA                |
| LOC_Os02g26349 | snp_02_15478472 |         | -0.3393868 | 0.0945643 | 0.0003882 | NA         | NA                |
| LOC_Os02g27000 | snp_02_15876071 | 13.0116 | -0.2881341 | 0.0961656 | 0.002957  | UTR3       | NA                |
| LOC_Os02g27490 | snp_02_16268167 | 13.0877 | -0.1925149 | 0.0955722 | 0.0447972 | intronic   | NA                |
| LOC_Os02g28180 | snp_02_16683168 | 13.1065 | -0.1928752 | 0.0944425 | 0.0419865 | downstream | NA                |
| LOC_Os02g36220 | snp_02_21860560 | 13.2155 | -0.2116404 | 0.0755675 | 0.0053938 | intronic   | NA                |
| LOC_Os02g27220 | snp_02_16010382 | 13.4403 | -0.2103679 | 0.0926    | 0.0237797 | exonic     | synonymous SNV    |
| LOC_Os02g29030 | snp_02_17191079 | 13.5423 | -0.238207  | 0.0948965 | 0.0125899 | exonic     | synonymous SNV    |
| LOC_Os02g30440 | snp_02_18130541 | 13.6012 | -0.2560959 | 0.0881004 | 0.0039147 | upstream   | NA                |
| LOC_Os02g27850 | snp_02_16487977 | 13.7209 | -0.2252007 | 0.0976505 | 0.021753  | UTR3       | NA                |
| LOC_Os02g29464 | snp_02_17503963 | 13.7233 | -0.2304891 | 0.094271  | 0.0150092 | exonic     | synonymous SNV    |
| LOC_Os02g26590 | snp_02_15613607 | 13.7633 | -0.196311  | 0.0949926 | 0.0395338 | downstream | NA                |
| LOC_Os02g28810 | snp_02_17037081 | 13.9401 | -0.2314143 | 0.0918942 | 0.0122589 | intronic   | NA                |
| LOC_Os02g30380 | snp_02_18092703 | 14.0897 | -0.2163315 | 0.0904192 | 0.0172777 | UTR3       | NA                |
| LOC_Os02g29890 | snp_02_17781288 | 14.1627 | -0.1764079 | 0.0845072 | 0.0376224 | UTR5       | NA                |
| LOC_Os02g29210 | snp_02_17336504 | 14.4415 | -0.3132494 | 0.0997934 | 0.0018641 | upstream   | NA                |

|                |                 |         |            |           |           |            |                   |
|----------------|-----------------|---------|------------|-----------|-----------|------------|-------------------|
| LOC_Os02g33890 | snp_02_20199340 | 14.4914 | -0.1913142 | 0.0781318 | 0.0148912 | intergenic | NA                |
|                | snp_02_20199396 |         | -0.2058169 | 0.0774193 | 0.0082544 | NA         | NA                |
| LOC_Os02g26840 | snp_02_15760177 | 14.6813 | -0.2055468 | 0.0913236 | 0.0251041 | exonic     | nonsynonymous SNV |
|                | snp_02_15760221 |         | -0.2450721 | 0.0939244 | 0.0095156 | exonic     | synonymous SNV    |
| LOC_Os02g26310 | snp_02_15452898 | 14.7417 | -0.2552927 | 0.0953161 | 0.007774  | downstream | NA                |
| LOC_Os02g33450 | snp_02_19882259 | 14.7946 | -0.3454082 | 0.0814981 | 3.022E-05 | exonic     | synonymous SNV    |
|                | snp_02_19882260 |         | -0.3783352 | 0.0792032 | 2.82E-06  | exonic     | synonymous SNV    |
|                | snp_02_19882295 |         | -0.3522878 | 0.0824884 | 2.635E-05 | exonic     | synonymous SNV    |
|                | snp_02_19884473 |         | -0.3100916 | 0.079624  | 0.000122  | intronic   | NA                |
| LOC_Os02g26670 | snp_02_15659575 | 14.8556 | -0.2320342 | 0.0903014 | 0.0106204 | exonic     | nonsynonymous SNV |
| LOC_Os02g33100 | snp_02_19659783 | 14.9409 | -0.3241262 | 0.0758768 | 2.578E-05 | downstream | NA                |
| LOC_Os02g25780 | snp_02_15106052 | 14.981  | -0.307755  | 0.1009296 | 0.0024984 | upstream   | G                 |
|                | snp_02_15106300 | 14.981  | -0.2801449 | 0.0954131 | 0.0035796 | upstream   | T                 |
| LOC_Os02g26600 | snp_02_15615777 | 15.0742 | -0.4025086 | 0.096451  | 3.838E-05 | exonic     | synonymous SNV    |
| LOC_Os02g26270 | snp_02_15428873 | 15.0961 | -0.3657917 | 0.1092079 | 0.0009232 | exonic     | nonsynonymous SNV |
|                | snp_02_15430884 |         | -0.2870265 | 0.1093195 | 0.0091365 | intronic   | NA                |
| LOC_Os02g29580 | snp_02_17600915 | 15.1336 | -0.2744189 | 0.0901466 | 0.0025395 | upstream   | NA                |
| LOC_Os02g26890 | snp_02_15789691 | 15.2734 | -0.2915884 | 0.0977039 | 0.0030658 | exonic     | synonymous SNV    |
| LOC_Os02g29370 | snp_02_17446176 | 15.297  | -0.2653853 | 0.0931134 | 0.004661  | upstream   | NA                |
|                | snp_02_17446330 |         | -0.2252922 | 0.0868042 | 0.0098945 | upstream   | NA                |
| LOC_Os02g27030 | snp_02_15892404 | 15.337  | -0.2150778 | 0.0951594 | 0.0245464 | intronic   | NA                |
|                | snp_02_15894520 |         | -0.2761097 | 0.1010738 | 0.0066833 | intronic   | NA                |
| LOC_Os02g30080 | snp_02_17862881 | 15.3506 | -0.2808568 | 0.0943863 | 0.0031619 | intronic   | NA                |
| LOC_Os02g28420 | snp_02_16810236 | 15.3939 | -0.3048177 | 0.0946423 | 0.0014002 | exonic     | nonsynonymous SNV |
| LOC_Os02g31230 | snp_02_18715998 | 15.4344 | -0.2751576 | 0.0848747 | 0.0013127 | intronic   | NA                |
| LOC_Os02g28210 | snp_02_16699586 | 15.4616 | -0.3120053 | 0.0975565 | 0.0015563 | exonic     | synonymous SNV    |
|                | snp_02_16699608 |         | -0.2911468 | 0.1040518 | 0.0055298 | downstream | NA                |
| LOC_Os02g33360 | snp_02_19819816 | 15.5044 | -0.3797412 | 0.0867723 | 1.72E-05  | upstream   | NA                |
| LOC_Os02g28400 | snp_02_16794771 | 15.5978 | -0.2601503 | 0.0909517 | 0.004514  | intergenic | NA                |
|                | snp_02_16794908 |         | -0.2850102 | 0.090992  | 0.0018971 | intergenic | NA                |
| LOC_Os02g29320 | snp_02_17416587 | 15.6218 | -0.2000323 | 0.091125  | 0.0288251 | exonic     | synonymous SNV    |
| LOC_Os02g33420 | snp_02_19860601 | 15.6276 | -0.3288402 | 0.0748264 | 1.56E-05  | exonic     | synonymous SNV    |
| LOC_Os02g25930 | snp_02_15219832 | 15.6599 | -0.2344815 | 0.0996219 | 0.0192733 | exonic     | nonsynonymous SNV |

|                |                 |         |            |           |           |            |                   |
|----------------|-----------------|---------|------------|-----------|-----------|------------|-------------------|
|                | snp_02_15219922 |         | -0.2398298 | 0.0936162 | 0.0109319 | exonic     | nonsynonymous SNV |
|                | snp_02_15220376 |         | -0.2625664 | 0.0964478 | 0.0068854 | exonic     | nonsynonymous SNV |
| LOC_Os02g27160 | snp_02_15990619 | 15.745  | -0.2337577 | 0.0996861 | 0.0196908 | upstream   | NA                |
| LOC_Os02g30250 | snp_02_17986683 | 16.0392 | -0.2481768 | 0.0980193 | 0.0118252 | downstream | NA                |
|                | snp_02_17986693 |         | -0.2305408 | 0.0977858 | 0.0189984 | downstream | NA                |
| LOC_Os02g30420 | snp_02_18120796 | 16.0725 | -0.2758964 | 0.0878918 | 0.001843  | exonic     | synonymous SNV    |
| LOC_Os02g31220 | snp_02_18711010 | 16.0944 | -0.2478896 | 0.0858962 | 0.0041621 | NA         | NA                |
|                | snp_02_18711211 |         | -0.2345987 | 0.0855321 | 0.0064272 | exonic     | synonymous SNV    |
| LOC_Os02g26940 | snp_02_15825151 | 16.1595 | -0.2958317 | 0.0957918 | 0.0021765 | exonic     | nonsynonymous SNV |
| LOC_Os02g31874 | snp_02_18828442 | 16.2266 | -0.3176977 | 0.0861913 | 0.0002678 | intronic   | NA                |
| LOC_Os02g30700 | snp_02_18290410 | 16.2772 | -0.3086269 | 0.084701  | 0.0003103 | exonic     | nonsynonymous SNV |
|                | snp_02_18290444 |         | -0.2910881 | 0.082421  | 0.0004693 | exonic     | synonymous SNV    |
| LOC_Os02g25870 | snp_02_15160683 | 16.3433 | -0.2940255 | 0.100472  | 0.0037215 | upstream   | NA                |
|                | snp_02_15160853 |         | -0.2658278 | 0.0928104 | 0.0045102 | upstream   | NA                |
|                | snp_02_15160883 |         | -0.2373843 | 0.0939969 | 0.01213   | upstream   | NA                |
|                | snp_02_15161482 |         | -0.1922748 | 0.0957852 | 0.0457122 | exonic     | nonsynonymous SNV |
| LOC_Os02g32750 | snp_02_19449660 | 16.344  | -0.4088015 | 0.0771209 | 2.107E-07 | downstream | NA                |
| LOC_Os02g29140 | snp_02_17258929 | 16.4805 | -0.2784701 | 0.0997626 | 0.0055989 | exonic     | synonymous SNV    |
|                | snp_02_17258984 |         | -0.2505226 | 0.1045114 | 0.0171612 | exonic     | synonymous SNV    |
|                | snp_02_17259650 |         | -0.2327744 | 0.0924513 | 0.0123494 | intronic   | NA                |
| LOC_Os02g31210 | snp_02_18694437 | 16.4834 | -0.2720503 | 0.0893305 | 0.0025311 | upstream   | NA                |
| LOC_Os02g33610 | snp_02_20009271 | 16.4992 | -0.2676018 | 0.0792534 | 0.0008228 | intronic   | NA                |
| LOC_Os02g29570 | snp_02_17591726 | 16.5297 | -0.2518142 | 0.0957381 | 0.0089743 | exonic     | synonymous SNV    |
|                | snp_02_17593523 |         | -0.2843169 | 0.0988565 | 0.0043162 | intronic   | NA                |
| LOC_Os02g27990 | snp_02_16574548 | 16.7955 | -0.3052371 | 0.0965874 | 0.0017475 | NA         | NA                |
|                | snp_02_16576923 |         | -0.2665729 | 0.0997276 | 0.0079538 | intergenic | NA                |
| LOC_Os02g30330 | snp_02_18067425 | 16.8005 | -0.2398572 | 0.0952749 | 0.0123373 | upstream   | NA                |
|                | snp_02_18068119 |         | -0.3388238 | 0.0977798 | 0.0006069 | upstream   | NA                |
|                | snp_02_18068141 |         | -0.3591177 | 0.0971424 | 0.0002594 | upstream   | NA                |
| LOC_Os02g30940 | snp_02_18481164 | 17.1042 | -0.2149057 | 0.0874166 | 0.0144655 | exonic     | nonsynonymous SNV |
|                | snp_02_18481190 |         | -0.1664532 | 0.084151  | 0.0487519 | exonic     | synonymous SNV    |
|                | snp_02_18481231 |         | -0.2261135 | 0.0883325 | 0.0109157 | exonic     | nonsynonymous SNV |
| LOC_Os02g30390 | snp_02_18098101 | 17.1567 | -0.3421414 | 0.0904437 | 0.000183  | downstream | NA                |

|                |                 |         |            |           |           |            |                   |
|----------------|-----------------|---------|------------|-----------|-----------|------------|-------------------|
| LOC_Os02g25770 | snp_02_15101212 | 17.296  | -0.3499909 | 0.1033495 | 0.0008231 | exonic     | synonymous SNV    |
|                | snp_02_15106052 |         | -0.3838338 | 0.1071628 | 0.0004106 | upstream   | G                 |
|                | snp_02_15106300 |         | -0.3072649 | 0.1021294 | 0.0028951 | upstream   | T                 |
| LOC_Os02g30150 | snp_02_17911664 | 17.3588 | -0.3383896 | 0.094536  | 0.0004054 | exonic     | nonsynonymous SNV |
| LOC_Os02g32760 | snp_02_19456018 | 17.4827 | -0.3670807 | 0.0773251 | 3.107E-06 | intronic   | NA                |
| LOC_Os02g31960 | snp_02_19456018 | 17.7699 | -0.3253285 | 0.0860782 | 0.0001891 | downstream | NA                |
| LOC_Os02g33560 | snp_02_19966766 | 17.8038 | -0.2953282 | 0.0761861 | 0.0001272 | exonic     | synonymous SNV    |
| LOC_Os02g31950 | snp_02_18882574 | 18.0123 | -0.3404448 | 0.0892825 | 0.0001673 | exonic     | nonsynonymous SNV |
| LOC_Os02g29070 | snp_02_17218097 | 18.0165 | -0.2620866 | 0.1063228 | 0.0142949 | exonic     | synonymous SNV    |
|                | snp_02_17218127 |         | -0.2417751 | 0.1036431 | 0.0203614 | exonic     | synonymous SNV    |
| LOC_Os02g32950 | snp_02_19568752 | 18.241  | -0.3582707 | 0.0802276 | 1.146E-05 | exonic     | synonymous SNV    |
|                | snp_02_19568814 |         | -0.3750768 | 0.0782522 | 2.63E-06  | UTR5       | NA                |
| LOC_Os02g31867 | snp_02_18825659 | 18.3184 | -0.3135617 | 0.0833194 | 0.0001994 | exonic     | synonymous SNV    |
|                | snp_02_18825660 |         | -0.3267268 | 0.0827402 | 9.662E-05 | exonic     | synonymous SNV    |
|                | snp_02_18825730 |         | -0.2902216 | 0.083561  | 0.0005851 | exonic     | synonymous SNV    |
| LOC_Os02g32860 | snp_02_19513808 | 18.421  | -0.4278437 | 0.0797901 | 1.671E-07 | exonic     | synonymous SNV    |
| LOC_Os02g28360 | snp_02_16761557 | 18.4526 | -0.2642847 | 0.0999795 | 0.0086438 | upstream   | NA                |
| LOC_Os02g31160 | snp_02_18660414 | 18.6266 | -0.3197427 | 0.0887839 | 0.0003649 | intronic   | NA                |
| LOC_Os02g33120 | snp_02_19703249 | 18.8352 | -0.3518469 | 0.0739515 | 3.017E-06 | downstream | NA                |
| LOC_Os02g32504 | snp_02_19226636 | 19.0301 | -0.3961946 | 0.080205  | 1.276E-06 | intronic   | NA                |
| LOC_Os02g33090 | snp_02_19654273 | 19.0398 | -0.3524366 | 0.0765273 | 6.179E-06 | exonic     | synonymous SNV    |
|                | snp_02_19654332 |         | -0.4042113 | 0.080191  | 8.199E-07 | exonic     | synonymous SNV    |
| LOC_Os02g33230 | snp_02_19755401 | 19.1843 | -0.3628553 | 0.0794964 | 7.008E-06 | downstream | NA                |
| LOC_Os02g32610 | snp_02_19329803 | 19.4398 | -0.4168413 | 0.0796346 | 3.092E-07 | intronic   | NA                |
| LOC_Os02g32710 | snp_02_19429943 | 19.4602 | -0.3674158 | 0.0786558 | 4.281E-06 | downstream | NA                |
| LOC_Os02g33250 | snp_02_19764675 | 19.4939 | -0.4128278 | 0.0777738 | 2.06E-07  | downstream | NA                |
|                | snp_02_19764769 |         | -0.4068304 | 0.077418  | 2.69E-07  | downstream | NA                |
| LOC_Os02g32990 | snp_02_19614069 | 19.8444 | -0.373173  | 0.0763212 | 1.601E-06 | UTR5       | NA                |
| LOC_Os02g33330 | snp_02_19798665 | 20.4076 | -0.3849273 | 0.0795753 | 2.008E-06 | UTR5       | NA                |
| LOC_Os02g30690 | snp_02_18286380 | 20.4629 | -0.2695603 | 0.0925109 | 0.0038218 | intronic   | NA                |
| LOC_Os02g32840 | snp_02_19487646 | 20.561  | -0.4214823 | 0.0773641 | 1.113E-07 | upstream   | NA                |
|                | snp_02_19488040 |         | -0.4673511 | 0.0802386 | 1.564E-08 | upstream   | NA                |
|                | snp_02_19488084 |         | -0.4544572 | 0.0800975 | 3.472E-08 | upstream   | NA                |

|                |                 |         |            |           |           |            |                   |
|----------------|-----------------|---------|------------|-----------|-----------|------------|-------------------|
| LOC_Os02g33110 | snp_02_19682485 | 20.8193 | -0.3308169 | 0.0816124 | 6.561E-05 | upstream   | NA                |
|                | snp_02_19685411 |         | -0.4372862 | 0.0846335 | 4.561E-07 | exonic     | synonymous SNV    |
|                | snp_02_19685438 |         | -0.4405478 | 0.0842281 | 3.34E-07  | exonic     | synonymous SNV    |
|                | snp_02_19685439 |         | -0.4372862 | 0.0846335 | 4.561E-07 | exonic     | synonymous SNV    |
| LOC_Os02g33600 | snp_02_20000687 | 21.196  | -0.3491836 | 0.0816252 | 2.523E-05 | upstream   | NA                |
|                | snp_02_20000944 |         | -0.3170674 | 0.0782985 | 6.506E-05 | upstream   | NA                |
| LOC_Os02g32580 | snp_02_19304020 | 21.4916 | -0.4617526 | 0.0784587 | 1.096E-08 | exonic     | nonsynonymous SNV |
|                | snp_02_19304085 |         | -0.5125892 | 0.0793919 | 4.501E-10 | intronic   | NA                |
| LOC_Os02g31910 | snp_02_18845763 | 21.766  | -0.2952812 | 0.0856607 | 0.0006382 | exonic     | synonymous SNV    |
|                | snp_02_18845781 |         | -0.2772627 | 0.0876414 | 0.0016997 | exonic     | synonymous SNV    |
|                | snp_02_18846101 |         | -0.3384471 | 0.0865765 | 0.0001119 | exonic     | synonymous SNV    |
|                | snp_02_18846852 |         | -0.2822202 | 0.0779932 | 0.0003416 | exonic     | synonymous SNV    |
|                | snp_02_18848592 |         | -0.2008092 | 0.086646  | 0.0210689 | exonic     | synonymous SNV    |
| LOC_Os02g32280 | snp_02_19062328 | 21.7711 | -0.4164403 | 0.0778365 | 1.658E-07 | exonic     | synonymous SNV    |
| LOC_Os02g32340 | snp_02_19091002 | 21.9644 | -0.3817222 | 0.0870178 | 1.612E-05 | UTR3       | NA                |
| LOC_Os02g32410 | snp_02_19163651 | 22.0995 | -0.4505461 | 0.0807526 | 5.614E-08 | downstream | NA                |
| LOC_Os02g32540 | snp_02_19262151 | 22.7247 | -0.3588753 | 0.0857476 | 3.892E-05 | UTR3       | NA                |
|                | snp_02_19262334 |         | -0.4961297 | 0.083948  | 1.061E-08 | upstream   | A                 |
|                | snp_02_19262345 |         | -0.460496  | 0.0820524 | 5.078E-08 | upstream   | C                 |
| LOC_Os02g32210 | snp_02_19028834 | 23.4863 | -0.4394506 | 0.0798167 | 7.57E-08  | intronic   | NA                |
| LOC_Os02g33620 | snp_02_20017292 | 23.6596 | -0.3606042 | 0.0784134 | 6.314E-06 | exonic     | synonymous SNV    |
|                | snp_02_20017408 |         | -0.4336722 | 0.0826505 | 2.957E-07 | exonic     | synonymous SNV    |
|                | snp_02_20017433 |         | -0.37272   | 0.0779283 | 2.734E-06 | intronic   | NA                |
|                | snp_02_20017486 |         | -0.2998652 | 0.0781191 | 0.0001514 | intronic   | NA                |
|                | snp_02_20019434 |         | -0.3377835 | 0.0800442 | 3.256E-05 | exonic     | synonymous SNV    |
| LOC_Os02g32940 | snp_02_19564705 | 25.6342 | -0.4079305 | 0.0780478 | 3.183E-07 | exonic     | synonymous SNV    |
|                | snp_02_19564739 |         | -0.3935499 | 0.0786211 | 9.368E-07 | exonic     | synonymous SNV    |
|                | snp_02_19564801 |         | -0.4220426 | 0.0792856 | 1.966E-07 | exonic     | synonymous SNV    |
|                | snp_02_19564806 |         | -0.3841168 | 0.078531  | 1.615E-06 | exonic     | synonymous SNV    |
|                | snp_02_19564894 |         | -0.3998679 | 0.079327  | 7.912E-07 | upstream   | NA                |
| LOC_Os02g32450 | snp_02_19186685 | 26.1547 | -0.4343471 | 0.0822019 | 2.649E-07 | exonic     | synonymous SNV    |
|                | snp_02_19186803 |         | -0.5353054 | 0.0854886 | 1.536E-09 | exonic     | synonymous SNV    |
|                | snp_02_19186913 |         | -0.4634065 | 0.0849368 | 1.121E-07 | exonic     | synonymous SNV    |



|    |                |                 |         |            |           |           |                      |                   |
|----|----------------|-----------------|---------|------------|-----------|-----------|----------------------|-------------------|
|    | LOC_Os02g28770 | snp_02_17022010 | 32.8808 | -0.2832151 | 0.1132753 | 0.012969  | exonic               | synonymous SNV    |
|    |                | snp_02_17022047 |         | -0.2842365 | 0.1123121 | 0.0119156 | exonic               | synonymous SNV    |
|    |                | snp_02_17022059 |         | -0.297465  | 0.1119247 | 0.008308  | exonic               | nonsynonymous SNV |
|    |                | snp_02_17022102 |         | -0.2897635 | 0.1036114 | 0.0055126 | exonic               | synonymous SNV    |
|    |                | snp_02_17022157 |         | -0.2994564 | 0.1021918 | 0.003658  | intronic             | NA                |
|    | LOC_Os02g25710 | snp_02_15056267 | 42.255  | -0.2607821 | 0.0996205 | 0.0093156 | intronic             | NA                |
|    | LOC_Os02g27290 | snp_02_16074185 | 45.4603 | -0.2280966 | 0.0980096 | 0.0205676 | intronic             | NA                |
|    | LOC_Os02g32660 | snp_02_19362520 | 59.1407 | -0.8237682 | 0.0440969 | 3.941E-54 | exon-intron junction | NA                |
|    |                | snp_02_19362520 | 7.9419  | -0.3205192 | 0.0626063 | 5.128E-07 | exon-intron junction | NA                |
|    | LOC_Os02g13440 | snp_02_7178016  | 5.6283  | -0.2206234 | 0.071961  | 0.0023626 | exonic               | synonymous SNV    |
|    | LOC_Os02g13520 | snp_02_7249337  | 2.5957  | -0.1766115 | 0.072736  | 0.0157557 | upstream             | NA                |
|    | LOC_Os02g13555 | snp_02_7266399  | 3.1026  | -0.1563146 | 0.0732168 | 0.0335746 | UTR3                 | NA                |
|    | LOC_Os02g13560 | snp_02_7275897  | 4.0757  | -0.1892387 | 0.0774826 | 0.0151917 | intronic             | NA                |
|    | LOC_Os02g13510 | snp_02_7222404  | 4.3657  | -0.1849309 | 0.0774068 | 0.0175366 | exonic               | synonymous SNV    |
|    | LOC_Os02g13810 | snp_02_7470132  | 3.412   | -0.1743107 | 0.0714718 | 0.0153309 | intronic             | NA                |
|    | LOC_Os02g14370 | snp_02_7892495  | 3.1723  | -0.1970196 | 0.0731626 | 0.0074926 | intergenic           | NA                |
|    | LOC_Os02g14310 | snp_02_7857480  | 3.1564  | -0.1880927 | 0.0747315 | 0.0124917 | exonic               | nonsynonymous SNV |
|    | LOC_Os02g14170 | snp_02_7761476  | 5.0769  | -0.1512886 | 0.0754935 | 0.0458827 | exonic               | synonymous SNV    |
|    |                | snp_02_7761675  |         | -0.1874537 | 0.0765588 | 0.0148624 | intronic             | NA                |
|    | LOC_Os02g29070 | snp_02_17217858 | 5.0289  | -0.1836375 | 0.0835314 | 0.0287283 | exonic               | nonsynonymous SNV |
| PC | LOC_Os02g31120 | snp_02_18607827 | 3.4527  | -0.1916545 | 0.0761899 | 0.0124744 | intronic             | NA                |
|    |                | snp_02_18608900 |         | -0.1999582 | 0.074129  | 0.0074324 | exonic               | synonymous SNV    |
|    | LOC_Os02g29720 | snp_02_17677905 | 3.4356  | -0.2256466 | 0.0888821 | 0.0116543 | exonic               | synonymous SNV    |
|    | LOC_Os02g26404 | snp_02_15512248 | 3.3343  | -0.1903982 | 0.0745953 | 0.011171  | intronic             | NA                |
|    | LOC_Os02g30210 | snp_02_17959252 | 4.6291  | -0.187093  | 0.0795387 | 0.0192885 | exonic               | nonsynonymous SNV |
|    | LOC_Os02g17620 | snp_02_10141997 | 3.2781  | -0.1900723 | 0.0813882 | 0.0202126 | intronic             | NA                |
|    |                | snp_02_10142051 |         | -0.187037  | 0.0816184 | 0.0226528 | intronic             | NA                |
|    | LOC_Os02g27030 | snp_02_15894520 | 2.6428  | -0.1648113 | 0.0795599 | 0.0391865 | intronic             | NA                |
|    | LOC_Os02g26294 | snp_02_15442082 | 2.8244  | -0.1697842 | 0.0807981 | 0.0363953 | UTR5                 | T                 |
|    | LOC_Os02g27000 | snp_02_15876071 | 5.5138  | -0.251306  | 0.0843091 | 0.0031059 | UTR3                 | NA                |
|    | LOC_Os02g25930 | snp_02_15220376 | 3.8316  | -0.2291882 | 0.0829282 | 0.0060914 | exonic               | nonsynonymous SNV |
|    | LOC_Os02g26280 | snp_02_15430882 | 4.0532  | -0.193078  | 0.0919928 | 0.0367463 | intronic             | NA                |
|    | LOC_Os02g29140 | snp_02_17259533 | 3.6213  | -0.1664154 | 0.0838382 | 0.0480943 | intronic             | NA                |

|                |                 |        |            |           |           |            |                   |
|----------------|-----------------|--------|------------|-----------|-----------|------------|-------------------|
| LOC_Os02g29464 | snp_02_17503963 | 3.1301 | -0.1911858 | 0.0837656 | 0.0231022 | exonic     | synonymous SNV    |
| LOC_Os02g28810 | snp_02_17037081 | 3.9408 | -0.1819401 | 0.0792495 | 0.0223052 | intronic   | NA                |
| LOC_Os02g26840 | snp_02_15760177 | 3.0375 | -0.1619807 | 0.0796025 | 0.0427173 | exonic     | nonsynonymous SNV |
|                | snp_02_15760221 |        | -0.1603946 | 0.0811094 | 0.0488725 | exonic     | synonymous SNV    |
| LOC_Os02g28210 | snp_02_16699331 | 4.0952 | -0.1776446 | 0.0796018 | 0.0264997 | exonic     | synonymous SNV    |
|                | snp_02_16699586 |        | -0.2623303 | 0.0819198 | 0.0015352 | exonic     | synonymous SNV    |
|                | snp_02_16699608 |        | -0.2399951 | 0.083053  | 0.0041857 | downstream | NA                |
| LOC_Os02g30330 | snp_02_18067425 | 4.3335 | -0.2258443 | 0.0855088 | 0.0086931 | upstream   | NA                |
| LOC_Os02g30940 | snp_02_18481164 | 3.9592 | -0.1756016 | 0.0783611 | 0.0256914 | exonic     | nonsynonymous SNV |
|                | snp_02_18481231 |        | -0.16741   | 0.0792362 | 0.0353643 | exonic     | nonsynonymous SNV |
| LOC_Os02g32210 | snp_02_19028834 | 2.6529 | -0.1639332 | 0.0716847 | 0.0228584 | intronic   | NA                |
| LOC_Os02g32450 | snp_02_19186803 | 2.2018 | -0.1811085 | 0.0832239 | 0.0304301 | exonic     | synonymous SNV    |
| LOC_Os02g29370 | snp_02_17446176 | 5.611  | -0.2752391 | 0.0851535 | 0.0013594 | upstream   | NA                |
|                | snp_02_17446330 |        | -0.2758242 | 0.0814282 | 0.0007962 | upstream   | NA                |
| LOC_Os02g30080 | snp_02_17862881 | 3.8594 | -0.1727934 | 0.0872446 | 0.0485537 | intronic   | NA                |
| LOC_Os02g28420 | snp_02_16810236 | 4.2435 | -0.1669523 | 0.0834572 | 0.0462347 | exonic     | nonsynonymous SNV |

**Table S4.2 Epistatic interactions of significant SNPs associated to AC and PC of F5-derived F6 RILs.**

| SNP1           | SNP2            | BETA_INT | STAT    | P-value   |
|----------------|-----------------|----------|---------|-----------|
| snp_02_7178016 | snp_02_16699331 | 0.234191 | 9.09574 | 0.002562  |
| snp_02_7178016 | snp_02_17046347 | 0.212126 | 7.68788 | 0.005559  |
| snp_02_7178016 | snp_02_17416587 | 0.203802 | 8.20813 | 0.00417   |
| snp_02_7178016 | snp_02_17593523 | 0.21078  | 7.6981  | 0.005528  |
| snp_02_7178016 | snp_02_17781288 | 0.182464 | 6.65504 | 0.009888  |
| snp_02_7178016 | snp_02_18067425 | 0.194334 | 7.64009 | 0.005709  |
| snp_02_7178016 | snp_02_18098101 | 0.219394 | 9.52801 | 0.002024  |
| snp_02_7178016 | snp_02_18286380 | 0.186255 | 6.85787 | 0.008825  |
| snp_02_7178016 | snp_02_18481190 | 0.212523 | 9.73094 | 0.001812  |
| snp_02_7178016 | snp_02_18607827 | 0.263658 | 12.5354 | 0.0003994 |
| snp_02_7178016 | snp_02_19062328 | 0.196031 | 9.39957 | 0.00217   |
| snp_02_7178016 | snp_02_19186803 | 0.195329 | 9.44347 | 0.002119  |
| snp_02_7178016 | snp_02_19226636 | 0.190025 | 7.91647 | 0.004899  |
| snp_02_7178016 | snp_02_19449660 | 0.179811 | 8.0703  | 0.0045    |
| snp_02_7178016 | snp_02_19513808 | 0.206228 | 9.15643 | 0.002479  |
| snp_02_7178016 | snp_02_19659783 | 0.190947 | 8.85497 | 0.002923  |
| snp_02_7178016 | snp_02_20000944 | 0.201357 | 9.67681 | 0.001866  |
| snp_02_7178016 | snp_02_20017486 | 0.185217 | 7.9009  | 0.004941  |
| snp_02_7178016 | snp_02_21860560 | 0.190758 | 9.81235 | 0.001734  |
| snp_02_7222404 | snp_02_16699331 | 0.240531 | 8.97331 | 0.00274   |
| snp_02_7222404 | snp_02_17781288 | 0.206323 | 8.63402 | 0.0033    |
| snp_02_7222404 | snp_02_18067425 | 0.210936 | 9.0118  | 0.002683  |
| snp_02_7222404 | snp_02_18290410 | 0.186756 | 6.95802 | 0.008345  |
| snp_02_7222404 | snp_02_18290444 | 0.189806 | 7.36022 | 0.006668  |
| snp_02_7222404 | snp_02_18607827 | 0.21937  | 9.19146 | 0.002432  |
| snp_02_7222404 | snp_02_18871693 | 0.185442 | 6.89029 | 0.008667  |

|                |                 |          |         |           |
|----------------|-----------------|----------|---------|-----------|
| snp_02_7222404 | snp_02_19062328 | 0.22456  | 12.181  | 0.0004829 |
| snp_02_7222404 | snp_02_19186803 | 0.171796 | 7.23446 | 0.007152  |
| snp_02_7222404 | snp_02_19488040 | 0.195792 | 9.41408 | 0.002153  |
| snp_02_7222404 | snp_02_19488084 | 0.184892 | 8.51062 | 0.003531  |
| snp_02_7222404 | snp_02_19513808 | 0.177405 | 7.88959 | 0.004972  |
| snp_02_7222404 | snp_02_19659783 | 0.177035 | 7.4281  | 0.006421  |
| snp_02_7222404 | snp_02_19682485 | 0.186933 | 7.87206 | 0.005021  |
| snp_02_7222404 | snp_02_19685411 | 0.1988   | 9.89082 | 0.001661  |
| snp_02_7222404 | snp_02_19685438 | 0.202762 | 10.2565 | 0.001362  |
| snp_02_7222404 | snp_02_19685439 | 0.196774 | 9.78845 | 0.001756  |
| snp_02_7222404 | snp_02_19703249 | 0.208972 | 10.3106 | 0.001323  |
| snp_02_7222404 | snp_02_20082377 | 0.179479 | 7.84706 | 0.00509   |
| snp_02_7222404 | snp_02_20082386 | 0.183295 | 8.01967 | 0.004627  |
| snp_02_7222404 | snp_02_20082615 | 0.178254 | 7.53059 | 0.006066  |
| snp_02_7222404 | snp_02_20082638 | 0.174152 | 7.36813 | 0.006639  |
| snp_02_7266399 | snp_02_16699331 | 0.214185 | 7.94745 | 0.004816  |
| snp_02_7266399 | snp_02_19062328 | 0.170327 | 7.19892 | 0.007295  |
| snp_02_7266399 | snp_02_19186803 | 0.197788 | 10.4114 | 0.001253  |
| snp_02_7266399 | snp_02_19226636 | 0.170418 | 6.65336 | 0.009897  |
| snp_02_7266399 | snp_02_19304020 | 0.188219 | 7.90581 | 0.004928  |
| snp_02_7266399 | snp_02_19449660 | 0.173411 | 7.77699 | 0.005292  |
| snp_02_7266399 | snp_02_19456018 | 0.177239 | 7.03823 | 0.007979  |
| snp_02_7266399 | snp_02_19487646 | 0.176291 | 7.56999 | 0.005935  |
| snp_02_7266399 | snp_02_19488040 | 0.165808 | 6.76849 | 0.009278  |
| snp_02_7266399 | snp_02_19488084 | 0.165784 | 6.8007  | 0.009112  |
| snp_02_7266399 | snp_02_19513808 | 0.193632 | 9.0214  | 0.002669  |
| snp_02_7266399 | snp_02_19659783 | 0.235625 | 13.9912 | 0.0001837 |
| snp_02_7266399 | snp_02_19685411 | 0.161649 | 6.695   | 0.009668  |
| snp_02_7266399 | snp_02_19685438 | 0.162108 | 6.64356 | 0.009952  |

|                |                 |          |         |           |
|----------------|-----------------|----------|---------|-----------|
| snp_02_7266399 | snp_02_19685439 | 0.161649 | 6.695   | 0.009668  |
| snp_02_7266399 | snp_02_19713122 | 0.227053 | 10.9    | 0.0009618 |
| snp_02_7266399 | snp_02_20082377 | 0.16864  | 7.15772 | 0.007464  |
| snp_02_7266399 | snp_02_20082386 | 0.171209 | 7.37898 | 0.006599  |
| snp_02_7266399 | snp_02_20082615 | 0.165504 | 6.95238 | 0.008371  |
| snp_02_7275897 | snp_02_16699331 | 0.217285 | 8.02209 | 0.004621  |
| snp_02_7275897 | snp_02_18067425 | 0.233046 | 11.3871 | 0.0007397 |
| snp_02_7275897 | snp_02_19186803 | 0.168931 | 7.82099 | 0.005164  |
| snp_02_7275897 | snp_02_19513808 | 0.194519 | 9.3822  | 0.002191  |
| snp_02_7275897 | snp_02_19713122 | 0.188969 | 7.81026 | 0.005195  |
| snp_02_7275897 | snp_02_19884473 | 0.162691 | 6.91424 | 0.008551  |
| snp_02_7470132 | snp_02_7743222  | 0.318297 | 6.76204 | 0.009312  |
| snp_02_7470132 | snp_02_7761476  | 0.352294 | 9.89923 | 0.001654  |
| snp_02_7470132 | snp_02_7761675  | 0.343945 | 8.97441 | 0.002738  |
| snp_02_7470132 | snp_02_15056267 | 0.215604 | 7.14461 | 0.007519  |
| snp_02_7470132 | snp_02_15160683 | 0.257572 | 10.8234 | 0.001002  |
| snp_02_7470132 | snp_02_15160853 | 0.215024 | 7.04274 | 0.007959  |
| snp_02_7470132 | snp_02_15161482 | 0.266484 | 10.9342 | 0.0009442 |
| snp_02_7470132 | snp_02_15220376 | 0.22724  | 8.32651 | 0.003907  |
| snp_02_7470132 | snp_02_15286516 | 0.2402   | 8.61435 | 0.003335  |
| snp_02_7470132 | snp_02_15613607 | 0.211135 | 7.23161 | 0.007163  |
| snp_02_7470132 | snp_02_15659575 | 0.19744  | 6.97732 | 0.008255  |
| snp_02_7470132 | snp_02_15760177 | 0.218313 | 7.85148 | 0.005078  |
| snp_02_7470132 | snp_02_15760221 | 0.211642 | 7.24732 | 0.007101  |
| snp_02_7470132 | snp_02_15825151 | 0.215871 | 7.35532 | 0.006687  |
| snp_02_7470132 | snp_02_15876071 | 0.238764 | 8.1228  | 0.004371  |
| snp_02_7470132 | snp_02_15894520 | 0.241747 | 8.7404  | 0.003112  |
| snp_02_7470132 | snp_02_16074185 | 0.213712 | 6.74532 | 0.009399  |
| snp_02_7470132 | snp_02_16268167 | 0.212588 | 7.30775 | 0.006866  |

|                |                 |          |         |           |
|----------------|-----------------|----------|---------|-----------|
| snp_02_7470132 | snp_02_16476369 | 0.220421 | 9.00241 | 0.002696  |
| snp_02_7470132 | snp_02_16487977 | 0.206351 | 7.24093 | 0.007126  |
| snp_02_7470132 | snp_02_16574548 | 0.221472 | 7.73739 | 0.005409  |
| snp_02_7470132 | snp_02_16699331 | 0.327758 | 16.5554 | 4.727E-05 |
| snp_02_7470132 | snp_02_16699586 | 0.216093 | 7.2748  | 0.006993  |
| snp_02_7470132 | snp_02_16750570 | 0.19959  | 6.79955 | 0.009118  |
| snp_02_7470132 | snp_02_16810236 | 0.206607 | 6.91407 | 0.008552  |
| snp_02_7470132 | snp_02_17037081 | 0.194533 | 6.96792 | 0.008298  |
| snp_02_7470132 | snp_02_17191079 | 0.22995  | 9.29937 | 0.002292  |
| snp_02_7470132 | snp_02_17218097 | 0.237277 | 9.61259 | 0.001933  |
| snp_02_7470132 | snp_02_17218127 | 0.246489 | 10.5943 | 0.001134  |
| snp_02_7470132 | snp_02_17258929 | 0.272274 | 12.2374 | 0.0004685 |
| snp_02_7470132 | snp_02_17258984 | 0.248807 | 10.0213 | 0.001547  |
| snp_02_7470132 | snp_02_17271281 | 0.20872  | 7.18601 | 0.007347  |
| snp_02_7470132 | snp_02_17271333 | 0.219524 | 7.80044 | 0.005223  |
| snp_02_7470132 | snp_02_17416587 | 0.28569  | 14.959  | 0.0001099 |
| snp_02_7470132 | snp_02_17503963 | 0.198565 | 6.89355 | 0.008651  |
| snp_02_7470132 | snp_02_17591726 | 0.240073 | 10.6671 | 0.001091  |
| snp_02_7470132 | snp_02_17600915 | 0.245092 | 10.6253 | 0.001116  |
| snp_02_7470132 | snp_02_17781288 | 0.293069 | 16.2808 | 5.464E-05 |
| snp_02_7470132 | snp_02_17911664 | 0.192104 | 6.76751 | 0.009283  |
| snp_02_7470132 | snp_02_17959252 | 0.209927 | 7.10091 | 0.007705  |
| snp_02_7470132 | snp_02_17986683 | 0.202098 | 7.13726 | 0.00755   |
| snp_02_7470132 | snp_02_17986693 | 0.198489 | 6.92753 | 0.008488  |
| snp_02_7470132 | snp_02_18067425 | 0.270437 | 14.3882 | 0.0001488 |
| snp_02_7470132 | snp_02_18068119 | 0.232825 | 9.55704 | 0.001992  |
| snp_02_7470132 | snp_02_18068141 | 0.229775 | 9.44999 | 0.002112  |
| snp_02_7470132 | snp_02_18092703 | 0.257946 | 11.8887 | 0.0005648 |
| snp_02_7470132 | snp_02_18098101 | 0.309169 | 18.1199 | 2.076E-05 |

|                |                 |          |         |           |
|----------------|-----------------|----------|---------|-----------|
| snp_02_7470132 | snp_02_18120796 | 0.248195 | 11.9194 | 0.0005556 |
| snp_02_7470132 | snp_02_18130541 | 0.234313 | 9.80289 | 0.001743  |
| snp_02_7470132 | snp_02_18240771 | 0.23404  | 9.99614 | 0.001569  |
| snp_02_7470132 | snp_02_18240912 | 0.238593 | 10.316  | 0.001319  |
| snp_02_7470132 | snp_02_18240951 | 0.243134 | 10.9454 | 0.0009385 |
| snp_02_7470132 | snp_02_18290410 | 0.220476 | 9.68882 | 0.001854  |
| snp_02_7470132 | snp_02_18290444 | 0.228295 | 10.5613 | 0.001155  |
| snp_02_7470132 | snp_02_18385163 | 0.220711 | 8.16596 | 0.004269  |
| snp_02_7470132 | snp_02_18607827 | 0.273607 | 13.3289 | 0.0002614 |
| snp_02_7470132 | snp_02_18846101 | 0.199825 | 8.39349 | 0.003766  |
| snp_02_7470132 | snp_02_18848592 | 0.227862 | 10.7105 | 0.001065  |
| snp_02_7470132 | snp_02_18871604 | 0.211855 | 8.86864 | 0.002901  |
| snp_02_7470132 | snp_02_18871693 | 0.21496  | 9.19543 | 0.002426  |
| snp_02_7470132 | snp_02_18889427 | 0.187287 | 6.9762  | 0.00826   |
| snp_02_7470132 | snp_02_19062328 | 0.219967 | 10.8952 | 0.0009643 |
| snp_02_7470132 | snp_02_19091002 | 0.190362 | 7.2327  | 0.007159  |
| snp_02_7470132 | snp_02_19186803 | 0.185824 | 8.03536 | 0.004587  |
| snp_02_7470132 | snp_02_19262334 | 0.189802 | 8.20451 | 0.004179  |
| snp_02_7470132 | snp_02_19262345 | 0.200073 | 9.48459 | 0.002072  |
| snp_02_7470132 | snp_02_19304020 | 0.175575 | 6.78795 | 0.009178  |
| snp_02_7470132 | snp_02_19449660 | 0.175594 | 7.63077 | 0.005738  |
| snp_02_7470132 | snp_02_19513808 | 0.214758 | 10.3294 | 0.001309  |
| snp_02_7470132 | snp_02_19659783 | 0.20539  | 9.6267  | 0.001918  |
| snp_02_7470132 | snp_02_19685411 | 0.201984 | 9.82577 | 0.001721  |
| snp_02_7470132 | snp_02_19685438 | 0.205767 | 10.1654 | 0.001431  |
| snp_02_7470132 | snp_02_19685439 | 0.200081 | 9.76173 | 0.001782  |
| snp_02_7743222 | snp_02_15220376 | 0.218818 | 8.15087 | 0.004304  |
| snp_02_7743222 | snp_02_16487977 | 0.216815 | 7.92472 | 0.004877  |
| snp_02_7743222 | snp_02_16699331 | 0.317987 | 17.441  | 2.965E-05 |

|                 |                 |           |         |           |
|-----------------|-----------------|-----------|---------|-----------|
| snp_02_7743222  | snp_02_17416587 | 0.206275  | 7.67224 | 0.005608  |
| snp_02_7743222  | snp_02_17781288 | 0.20254   | 7.76089 | 0.005339  |
| snp_02_7743222  | snp_02_18067425 | 0.210835  | 8.59424 | 0.003372  |
| snp_02_7743222  | snp_02_18098101 | 0.225565  | 9.54758 | 0.002002  |
| snp_02_7743222  | snp_02_18120796 | 0.189714  | 7.15638 | 0.00747   |
| snp_02_7743222  | snp_02_18290444 | 0.180428  | 6.68408 | 0.009728  |
| snp_02_7743222  | snp_02_18607827 | 0.203376  | 7.67716 | 0.005593  |
| snp_02_7743222  | snp_02_20082377 | 0.170338  | 7.23168 | 0.007163  |
| snp_02_7743222  | snp_02_20082383 | 0.191785  | 9.1265  | 0.002519  |
| snp_02_7743222  | snp_02_20082386 | 0.166792  | 6.7666  | 0.009288  |
| snp_02_7761476  | snp_02_16699331 | 0.316689  | 16.0415 | 6.2E-05   |
| snp_02_7761476  | snp_02_17781288 | 0.216561  | 8.82141 | 0.002977  |
| snp_02_7761476  | snp_02_17959252 | 0.203529  | 6.6657  | 0.009829  |
| snp_02_7761476  | snp_02_18067425 | 0.202245  | 7.55691 | 0.005978  |
| snp_02_7761476  | snp_02_19186803 | 0.17731   | 7.9199  | 0.00489   |
| snp_02_7761476  | snp_02_20037230 | 0.165679  | 7.04563 | 0.007946  |
| snp_02_7761675  | snp_02_16699331 | 0.306558  | 14.7095 | 0.0001255 |
| snp_02_7761675  | snp_02_17781288 | 0.198906  | 7.11949 | 0.007625  |
| snp_02_7761675  | snp_02_19186803 | 0.170234  | 7.18133 | 0.007367  |
| snp_02_7857480  | snp_02_19091002 | 0.19001   | 7.09991 | 0.007709  |
| snp_02_7892495  | snp_02_16699331 | 0.26385   | 10.6431 | 0.001105  |
| snp_02_7892495  | snp_02_20017486 | 0.182144  | 6.95722 | 0.008348  |
| snp_02_10142051 | snp_02_16699331 | 0.287376  | 10.0143 | 0.001553  |
| snp_02_15101212 | snp_02_17677891 | -0.337436 | 7.82032 | 0.005166  |
| snp_02_15101212 | snp_02_19429943 | 0.204928  | 7.10575 | 0.007684  |
| snp_02_15101212 | snp_02_19568814 | 0.212368  | 7.09836 | 0.007716  |
| snp_02_15106052 | snp_02_18130541 | 0.286877  | 6.89712 | 0.008634  |
| snp_02_15106052 | snp_02_18385163 | 0.291197  | 6.64721 | 0.009931  |
| snp_02_15106052 | snp_02_19304020 | 0.198386  | 6.97839 | 0.00825   |



|                 |                 |          |         |          |
|-----------------|-----------------|----------|---------|----------|
| snp_02_15106052 | snp_02_19429943 | 0.194168 | 6.75273 | 0.009361 |
| snp_02_15106052 | snp_02_19685411 | 0.193963 | 6.93328 | 0.008461 |
| snp_02_15106052 | snp_02_19685438 | 0.197371 | 7.16449 | 0.007436 |
| snp_02_15106052 | snp_02_19685439 | 0.189054 | 6.68944 | 0.009699 |
| snp_02_15106300 | snp_02_15789691 | 0.440386 | 8.01312 | 0.004644 |
| snp_02_15106300 | snp_02_18130541 | 0.257671 | 6.67232 | 0.009792 |
| snp_02_15106300 | snp_02_19429943 | 0.218735 | 8.47375 | 0.003603 |
| snp_02_15106300 | snp_02_19449660 | 0.204329 | 7.63085 | 0.005738 |
| snp_02_15106300 | snp_02_19513808 | 0.197274 | 7.6831  | 0.005574 |
| snp_02_15106300 | snp_02_19659783 | 0.193533 | 7.48724 | 0.006214 |
| snp_02_15106300 | snp_02_19685411 | 0.208922 | 8.34078 | 0.003877 |
| snp_02_15106300 | snp_02_19685438 | 0.212252 | 8.59086 | 0.003379 |
| snp_02_15106300 | snp_02_19685439 | 0.204104 | 8.08946 | 0.004452 |
| snp_02_15106300 | snp_02_19703249 | 0.196143 | 7.64846 | 0.005682 |
| snp_02_15106300 | snp_02_20017486 | 0.195179 | 7.09549 | 0.007728 |
| snp_02_15106300 | snp_02_21016307 | 0.181998 | 7.1139  | 0.007649 |
| snp_02_15160683 | snp_02_19062328 | 0.185998 | 6.7053  | 0.009613 |
| snp_02_15160683 | snp_02_19429943 | 0.194258 | 7.47669 | 0.00625  |
| snp_02_15160683 | snp_02_19659783 | 0.190357 | 8.05108 | 0.004548 |
| snp_02_15160683 | snp_02_19703249 | 0.207217 | 8.73914 | 0.003115 |
| snp_02_15160683 | snp_02_20017486 | 0.187507 | 7.04266 | 0.007959 |
| snp_02_15160853 | snp_02_16470423 | 0.316091 | 7.89508 | 0.004957 |
| snp_02_15160853 | snp_02_17600915 | 0.273207 | 7.94104 | 0.004833 |
| snp_02_15160853 | snp_02_17781288 | 0.27269  | 8.99756 | 0.002704 |
| snp_02_15160853 | snp_02_18092703 | 0.252349 | 7.5213  | 0.006097 |
| snp_02_15160853 | snp_02_18120796 | 0.27272  | 9.61742 | 0.001928 |
| snp_02_15160853 | snp_02_18385163 | 0.294889 | 9.07106 | 0.002597 |
| snp_02_15160853 | snp_02_19226636 | 0.216687 | 9.48467 | 0.002072 |
| snp_02_15160853 | snp_02_19429943 | 0.193458 | 7.36163 | 0.006663 |

|                 |                 |          |         |           |
|-----------------|-----------------|----------|---------|-----------|
| snp_02_15160853 | snp_02_19449660 | 0.183116 | 6.90203 | 0.00861   |
| snp_02_15160853 | snp_02_19456018 | 0.184265 | 6.93555 | 0.00845   |
| snp_02_15160853 | snp_02_19488040 | 0.215762 | 9.2591  | 0.002343  |
| snp_02_15160853 | snp_02_19488084 | 0.198166 | 7.60533 | 0.00582   |
| snp_02_15160853 | snp_02_19685411 | 0.188929 | 7.47246 | 0.006265  |
| snp_02_15160853 | snp_02_19685438 | 0.194254 | 7.85917 | 0.005056  |
| snp_02_15160853 | snp_02_19685439 | 0.184026 | 7.20803 | 0.007258  |
| snp_02_15160853 | snp_02_20037230 | 0.174494 | 6.84032 | 0.008912  |
| snp_02_15160883 | snp_02_15558985 | 0.295619 | 6.79142 | 0.00916   |
| snp_02_15160883 | snp_02_15894520 | 0.293255 | 6.83829 | 0.008922  |
| snp_02_15160883 | snp_02_16470322 | 0.385047 | 12.0346 | 0.0005223 |
| snp_02_15160883 | snp_02_16470423 | 0.420292 | 14.5603 | 0.0001358 |
| snp_02_15160883 | snp_02_16794771 | 0.252352 | 7.0438  | 0.007954  |
| snp_02_15160883 | snp_02_16962209 | 0.271129 | 6.79737 | 0.009129  |
| snp_02_15160883 | snp_02_17046347 | 0.268774 | 6.84867 | 0.008871  |
| snp_02_15160883 | snp_02_17593523 | 0.261111 | 7.04195 | 0.007962  |
| snp_02_15160883 | snp_02_17781288 | 0.296118 | 10.7165 | 0.001062  |
| snp_02_15160883 | snp_02_17959252 | 0.279361 | 7.33067 | 0.006779  |
| snp_02_15160883 | snp_02_18067425 | 0.227015 | 7.08454 | 0.007775  |
| snp_02_15160883 | snp_02_18092703 | 0.240076 | 6.73352 | 0.009462  |
| snp_02_15160883 | snp_02_18120796 | 0.245721 | 7.56676 | 0.005946  |
| snp_02_15160883 | snp_02_18290410 | 0.240652 | 8.21324 | 0.004159  |
| snp_02_15160883 | snp_02_18290444 | 0.240818 | 8.36076 | 0.003834  |
| snp_02_15160883 | snp_02_18385163 | 0.30443  | 8.88639 | 0.002873  |
| snp_02_15160883 | snp_02_18607827 | 0.261334 | 8.22545 | 0.004131  |
| snp_02_15160883 | snp_02_19226636 | 0.229235 | 10.5343 | 0.001172  |
| snp_02_15160883 | snp_02_19488040 | 0.231749 | 10.6938 | 0.001075  |
| snp_02_15160883 | snp_02_19488084 | 0.213654 | 8.84817 | 0.002934  |
| snp_02_15160883 | snp_02_20009271 | 0.179958 | 6.68978 | 0.009697  |

|                 |                 |          |         |           |
|-----------------|-----------------|----------|---------|-----------|
| snp_02_15219832 | snp_02_16699331 | 0.331876 | 6.75866 | 0.009329  |
| snp_02_15219832 | snp_02_19513808 | 0.225004 | 8.83805 | 0.00295   |
| snp_02_15219832 | snp_02_19703249 | 0.190197 | 7.14157 | 0.007532  |
| snp_02_15286516 | snp_02_16750570 | 0.334074 | 8.16422 | 0.004273  |
| snp_02_15286516 | snp_02_18067425 | 0.278735 | 7.26826 | 0.007018  |
| snp_02_15286516 | snp_02_18385163 | 0.309698 | 8.44519 | 0.00366   |
| snp_02_15286516 | snp_02_19513808 | 0.213011 | 7.01596 | 0.008079  |
| snp_02_15286516 | snp_02_19659783 | 0.194336 | 6.83844 | 0.008922  |
| snp_02_15286516 | snp_02_19703249 | 0.23178  | 9.31194 | 0.002277  |
| snp_02_15400132 | snp_02_19513808 | 0.206791 | 7.34268 | 0.006734  |
| snp_02_15428873 | snp_02_17600915 | 0.322758 | 7.82296 | 0.005159  |
| snp_02_15428873 | snp_02_18067425 | 0.266862 | 6.829   | 0.008969  |
| snp_02_15428873 | snp_02_19028834 | 0.206783 | 6.71824 | 0.009543  |
| snp_02_15428873 | snp_02_19062328 | 0.239185 | 10.2306 | 0.001381  |
| snp_02_15428873 | snp_02_19186685 | 0.190734 | 6.90829 | 0.00858   |
| snp_02_15428873 | snp_02_19186803 | 0.194112 | 7.06399 | 0.007865  |
| snp_02_15428873 | snp_02_19226636 | 0.200628 | 7.29971 | 0.006897  |
| snp_02_15428873 | snp_02_19304020 | 0.21695  | 8.23833 | 0.004102  |
| snp_02_15428873 | snp_02_19304085 | 0.202611 | 7.05489 | 0.007905  |
| snp_02_15428873 | snp_02_19429943 | 0.251812 | 11.6683 | 0.0006359 |
| snp_02_15428873 | snp_02_19449660 | 0.212595 | 9.26334 | 0.002338  |
| snp_02_15428873 | snp_02_19456018 | 0.211888 | 8.21572 | 0.004153  |
| snp_02_15428873 | snp_02_19487646 | 0.190902 | 7.06451 | 0.007863  |
| snp_02_15428873 | snp_02_19488040 | 0.200164 | 7.42941 | 0.006417  |
| snp_02_15428873 | snp_02_19488084 | 0.209176 | 8.05931 | 0.004527  |
| snp_02_15428873 | snp_02_19513808 | 0.193246 | 6.95203 | 0.008372  |
| snp_02_15428873 | snp_02_19659783 | 0.243346 | 12.5971 | 0.0003864 |
| snp_02_15428873 | snp_02_19682485 | 0.222868 | 8.63111 | 0.003305  |
| snp_02_15428873 | snp_02_19685411 | 0.233579 | 10.8128 | 0.001008  |

|                 |                 |          |         |           |
|-----------------|-----------------|----------|---------|-----------|
| snp_02_15428873 | snp_02_19685438 | 0.237118 | 11.1159 | 0.000856  |
| snp_02_15428873 | snp_02_19685439 | 0.227834 | 10.4519 | 0.001225  |
| snp_02_15428873 | snp_02_19703249 | 0.23063  | 10.8429 | 0.0009919 |
| snp_02_15428873 | snp_02_19713122 | 0.203717 | 7.28066 | 0.00697   |
| snp_02_15428873 | snp_02_19755401 | 0.196961 | 7.62223 | 0.005765  |
| snp_02_15428873 | snp_02_19764675 | 0.182038 | 6.78574 | 0.009189  |
| snp_02_15428873 | snp_02_19764769 | 0.181678 | 6.81473 | 0.009041  |
| snp_02_15428873 | snp_02_20037230 | 0.190433 | 7.67091 | 0.005612  |
| snp_02_15428873 | snp_02_21016307 | 0.181488 | 7.41404 | 0.006472  |
| snp_02_15430882 | snp_02_19062328 | 0.226352 | 8.3614  | 0.003833  |
| snp_02_15430882 | snp_02_19186685 | 0.245929 | 9.23285 | 0.002377  |
| snp_02_15430882 | snp_02_19226636 | 0.217148 | 7.33834 | 0.00675   |
| snp_02_15430882 | snp_02_19429943 | 0.20826  | 6.98392 | 0.008225  |
| snp_02_15430882 | snp_02_19449660 | 0.232632 | 8.80003 | 0.003012  |
| snp_02_15430882 | snp_02_19488040 | 0.229495 | 8.00959 | 0.004653  |
| snp_02_15430882 | snp_02_19488084 | 0.233142 | 8.34445 | 0.003869  |
| snp_02_15430882 | snp_02_19659783 | 0.217805 | 8.51724 | 0.003518  |
| snp_02_15430884 | snp_02_19062328 | 0.244019 | 9.62322 | 0.001921  |
| snp_02_15430884 | snp_02_19186685 | 0.260857 | 10.2401 | 0.001374  |
| snp_02_15430884 | snp_02_19226636 | 0.230857 | 8.15537 | 0.004294  |
| snp_02_15430884 | snp_02_19429943 | 0.227976 | 8.21438 | 0.004156  |
| snp_02_15430884 | snp_02_19449660 | 0.2467   | 9.7108  | 0.001832  |
| snp_02_15430884 | snp_02_19488040 | 0.244207 | 8.87039 | 0.002898  |
| snp_02_15430884 | snp_02_19488084 | 0.247706 | 9.22494 | 0.002388  |
| snp_02_15430884 | snp_02_19659783 | 0.233768 | 9.76662 | 0.001777  |
| snp_02_15430884 | snp_02_19764675 | 0.202408 | 7.50113 | 0.006166  |
| snp_02_15430884 | snp_02_19764769 | 0.202926 | 7.65164 | 0.005672  |
| snp_02_15442082 | snp_02_19062328 | 0.226125 | 9.83395 | 0.001713  |
| snp_02_15442082 | snp_02_19429943 | 0.205945 | 7.64382 | 0.005697  |

|                 |                 |          |         |          |
|-----------------|-----------------|----------|---------|----------|
| snp_02_15442082 | snp_02_19488040 | 0.203908 | 7.65047 | 0.005676 |
| snp_02_15442082 | snp_02_19659783 | 0.186808 | 7.51814 | 0.006108 |
| snp_02_15442082 | snp_02_19703249 | 0.222587 | 10.4364 | 0.001236 |
| snp_02_15452898 | snp_02_19062328 | 0.198349 | 8.00212 | 0.004672 |
| snp_02_15452898 | snp_02_19226636 | 0.188937 | 6.75678 | 0.009339 |
| snp_02_15452898 | snp_02_19703249 | 0.199607 | 8.85837 | 0.002918 |
| snp_02_15452898 | snp_02_20037230 | 0.218228 | 10.0874 | 0.001493 |
| snp_02_15512248 | snp_02_16750570 | 0.303214 | 6.92686 | 0.008491 |
| snp_02_15512248 | snp_02_17416587 | 0.283258 | 6.79793 | 0.009126 |
| snp_02_15512248 | snp_02_18067425 | 0.276129 | 9.41729 | 0.00215  |
| snp_02_15512248 | snp_02_18290410 | 0.229682 | 6.76338 | 0.009305 |
| snp_02_15512248 | snp_02_18290444 | 0.222271 | 6.72054 | 0.009531 |
| snp_02_15512248 | snp_02_18385163 | 0.377249 | 14.53   | 0.000138 |
| snp_02_15512248 | snp_02_19429943 | 0.223965 | 8.88802 | 0.002871 |
| snp_02_15512248 | snp_02_19488040 | 0.201614 | 7.26088 | 0.007047 |
| snp_02_15512248 | snp_02_19488084 | 0.200066 | 7.21458 | 0.007231 |
| snp_02_15512248 | snp_02_19513808 | 0.183387 | 6.85383 | 0.008845 |
| snp_02_15512248 | snp_02_19685411 | 0.199083 | 8.14345 | 0.004322 |
| snp_02_15512248 | snp_02_19685438 | 0.202373 | 8.39206 | 0.003769 |
| snp_02_15512248 | snp_02_19685439 | 0.195025 | 7.94046 | 0.004834 |
| snp_02_15512248 | snp_02_19703249 | 0.188048 | 7.61213 | 0.005798 |
| snp_02_15558985 | snp_02_18385163 | 0.323113 | 9.85137 | 0.001697 |
| snp_02_15558985 | snp_02_19429943 | 0.213714 | 7.86221 | 0.005048 |
| snp_02_15558985 | snp_02_19659783 | 0.183535 | 6.85245 | 0.008852 |
| snp_02_15558985 | snp_02_19703249 | 0.186075 | 7.15722 | 0.007466 |
| snp_02_15613607 | snp_02_19186685 | 0.18982  | 7.10819 | 0.007673 |
| snp_02_15613607 | snp_02_19456018 | 0.185107 | 6.73666 | 0.009445 |
| snp_02_15613607 | snp_02_19488040 | 0.207949 | 8.8357  | 0.002954 |
| snp_02_15613607 | snp_02_19488084 | 0.208907 | 8.84632 | 0.002937 |

|                 |                 |          |         |           |
|-----------------|-----------------|----------|---------|-----------|
| snp_02_15613607 | snp_02_19685411 | 0.183391 | 7.03923 | 0.007974  |
| snp_02_15613607 | snp_02_19685438 | 0.186372 | 7.25288 | 0.007079  |
| snp_02_15613607 | snp_02_19685439 | 0.180045 | 6.88118 | 0.008711  |
| snp_02_15613607 | snp_02_19703249 | 0.175123 | 6.65644 | 0.00988   |
| snp_02_15613607 | snp_02_20009271 | 0.187894 | 7.42569 | 0.00643   |
| snp_02_15659575 | snp_02_16574548 | 0.309734 | 7.23755 | 0.00714   |
| snp_02_15659575 | snp_02_19429943 | 0.22965  | 10.4744 | 0.001211  |
| snp_02_15659575 | snp_02_19449660 | 0.199617 | 8.20402 | 0.00418   |
| snp_02_15659575 | snp_02_19456018 | 0.180737 | 6.673   | 0.009788  |
| snp_02_15659575 | snp_02_19488040 | 0.203792 | 8.51645 | 0.00352   |
| snp_02_15659575 | snp_02_19488084 | 0.201847 | 8.2762  | 0.004017  |
| snp_02_15659575 | snp_02_19513808 | 0.22439  | 10.5497 | 0.001162  |
| snp_02_15659575 | snp_02_19659783 | 0.19273  | 8.56071 | 0.003435  |
| snp_02_15659575 | snp_02_19685411 | 0.191223 | 7.8368  | 0.005119  |
| snp_02_15659575 | snp_02_19685438 | 0.193992 | 8.04814 | 0.004555  |
| snp_02_15659575 | snp_02_19685439 | 0.185755 | 7.53505 | 0.006051  |
| snp_02_15659575 | snp_02_19703249 | 0.222722 | 11.3607 | 0.0007503 |
| snp_02_15659575 | snp_02_19882259 | 0.198493 | 8.03985 | 0.004576  |
| snp_02_15659575 | snp_02_19882295 | 0.193837 | 7.70698 | 0.005501  |
| snp_02_15659575 | snp_02_19884473 | 0.18769  | 7.96644 | 0.004765  |
| snp_02_15659575 | snp_02_19966766 | 0.174073 | 6.77578 | 0.00924   |
| snp_02_15659575 | snp_02_20017433 | 0.200661 | 7.68502 | 0.005568  |
| snp_02_15659575 | snp_02_20017486 | 0.190408 | 7.75043 | 0.00537   |
| snp_02_15659575 | snp_02_20037230 | 0.209065 | 10.2899 | 0.001338  |
| snp_02_15659575 | snp_02_20082383 | 0.178413 | 7.12344 | 0.007608  |
| snp_02_15760177 | snp_02_16574548 | 0.322202 | 7.51114 | 0.006132  |
| snp_02_15760177 | snp_02_18290410 | 0.247126 | 7.20746 | 0.00726   |
| snp_02_15760177 | snp_02_18290444 | 0.243696 | 7.40827 | 0.006493  |
| snp_02_15760177 | snp_02_18825660 | 0.237867 | 7.13691 | 0.007551  |

|                 |                 |          |         |          |
|-----------------|-----------------|----------|---------|----------|
| snp_02_15760177 | snp_02_19062328 | 0.215117 | 9.26723 | 0.002333 |
| snp_02_15760177 | snp_02_19186685 | 0.19211  | 7.60806 | 0.005811 |
| snp_02_15760177 | snp_02_19186803 | 0.215646 | 9.44494 | 0.002117 |
| snp_02_15760177 | snp_02_19226636 | 0.193971 | 7.47414 | 0.006259 |
| snp_02_15760177 | snp_02_19304020 | 0.193757 | 6.84345 | 0.008897 |
| snp_02_15760177 | snp_02_19304085 | 0.200076 | 7.2255  | 0.007188 |
| snp_02_15760177 | snp_02_19429943 | 0.196331 | 7.3526  | 0.006697 |
| snp_02_15760177 | snp_02_19488040 | 0.19571  | 7.49186 | 0.006198 |
| snp_02_15760177 | snp_02_19488084 | 0.19669  | 7.50233 | 0.006162 |
| snp_02_15760177 | snp_02_19513808 | 0.198645 | 7.884   | 0.004988 |
| snp_02_15760177 | snp_02_19659783 | 0.209876 | 9.55475 | 0.001994 |
| snp_02_15760177 | snp_02_19703249 | 0.191154 | 7.9121  | 0.004911 |
| snp_02_15760177 | snp_02_19966766 | 0.175105 | 6.71575 | 0.009557 |
| snp_02_15760177 | snp_02_20009271 | 0.177675 | 6.8698  | 0.008767 |
| snp_02_15760177 | snp_02_20017408 | 0.1988   | 7.76928 | 0.005314 |
| snp_02_15760177 | snp_02_20017433 | 0.207657 | 8.28339 | 0.004001 |
| snp_02_15760177 | snp_02_20037230 | 0.214141 | 10.1999 | 0.001405 |
| snp_02_15760221 | snp_02_19186803 | 0.204524 | 8.39376 | 0.003765 |
| snp_02_15760221 | snp_02_19513808 | 0.189057 | 7.15901 | 0.007459 |
| snp_02_15760221 | snp_02_19659783 | 0.195159 | 8.09826 | 0.004431 |
| snp_02_15760221 | snp_02_19703249 | 0.181967 | 7.10768 | 0.007676 |
| snp_02_15760221 | snp_02_20037230 | 0.189745 | 7.7963  | 0.005235 |
| snp_02_15760221 | snp_02_21016307 | 0.183913 | 7.97548 | 0.004742 |
| snp_02_15789691 | snp_02_16750570 | 0.316727 | 6.8568  | 0.008831 |
| snp_02_15789691 | snp_02_19186685 | 0.199601 | 8.02336 | 0.004618 |
| snp_02_15789691 | snp_02_19226636 | 0.199946 | 6.96877 | 0.008295 |
| snp_02_15789691 | snp_02_19304020 | 0.244095 | 10.3464 | 0.001297 |
| snp_02_15789691 | snp_02_19304085 | 0.231056 | 9.12674 | 0.002519 |
| snp_02_15789691 | snp_02_19429943 | 0.22654  | 9.12336 | 0.002524 |

|                 |                 |          |         |           |
|-----------------|-----------------|----------|---------|-----------|
| snp_02_15789691 | snp_02_19449660 | 0.207146 | 8.08362 | 0.004467  |
| snp_02_15789691 | snp_02_19488040 | 0.204567 | 7.43928 | 0.006382  |
| snp_02_15789691 | snp_02_19488084 | 0.202824 | 7.23561 | 0.007147  |
| snp_02_15789691 | snp_02_19659783 | 0.206791 | 8.885   | 0.002875  |
| snp_02_15789691 | snp_02_19685411 | 0.200772 | 8.17171 | 0.004255  |
| snp_02_15789691 | snp_02_19685438 | 0.203628 | 8.29909 | 0.003967  |
| snp_02_15789691 | snp_02_19685439 | 0.195855 | 7.79016 | 0.005253  |
| snp_02_15789691 | snp_02_19703249 | 0.202718 | 8.18706 | 0.004219  |
| snp_02_15789691 | snp_02_19764675 | 0.188581 | 7.35876 | 0.006674  |
| snp_02_15789691 | snp_02_19764769 | 0.186045 | 7.24832 | 0.007097  |
| snp_02_15789691 | snp_02_20017486 | 0.214186 | 8.77389 | 0.003056  |
| snp_02_15789691 | snp_02_20037230 | 0.193821 | 7.75892 | 0.005345  |
| snp_02_15789691 | snp_02_21016307 | 0.220355 | 11.295  | 0.0007773 |
| snp_02_15876071 | snp_02_16750570 | 0.343109 | 7.35405 | 0.006691  |
| snp_02_15876071 | snp_02_18067425 | 0.249828 | 6.78149 | 0.009211  |
| snp_02_15876071 | snp_02_19062328 | 0.281273 | 13.154  | 0.000287  |
| snp_02_15876071 | snp_02_19186685 | 0.209094 | 8.03873 | 0.004579  |
| snp_02_15876071 | snp_02_19304020 | 0.223612 | 7.82956 | 0.00514   |
| snp_02_15876071 | snp_02_19304085 | 0.23213  | 8.38841 | 0.003776  |
| snp_02_15876071 | snp_02_19429943 | 0.203779 | 7.36157 | 0.006663  |
| snp_02_15876071 | snp_02_19449660 | 0.204764 | 7.955   | 0.004796  |
| snp_02_15876071 | snp_02_19513808 | 0.240139 | 10.0936 | 0.001488  |
| snp_02_15876071 | snp_02_19659783 | 0.205921 | 8.60083 | 0.00336   |
| snp_02_15876071 | snp_02_19685411 | 0.204011 | 7.46753 | 0.006282  |
| snp_02_15876071 | snp_02_19685438 | 0.20749  | 7.70421 | 0.005509  |
| snp_02_15876071 | snp_02_19685439 | 0.200036 | 7.2727  | 0.007001  |
| snp_02_15876071 | snp_02_19703249 | 0.250963 | 12.348  | 0.0004415 |
| snp_02_15876071 | snp_02_19764675 | 0.185178 | 6.7907  | 0.009163  |
| snp_02_15876071 | snp_02_19764769 | 0.203964 | 8.38978 | 0.003773  |



|                 |                 |          |         |           |
|-----------------|-----------------|----------|---------|-----------|
| snp_02_15876071 | snp_02_19882259 | 0.196272 | 7.14211 | 0.00753   |
| snp_02_15876071 | snp_02_19882295 | 0.200952 | 7.52718 | 0.006078  |
| snp_02_15894520 | snp_02_19186685 | 0.206473 | 7.84986 | 0.005083  |
| snp_02_15894520 | snp_02_19429943 | 0.209799 | 7.83779 | 0.005117  |
| snp_02_15894520 | snp_02_19659783 | 0.218811 | 9.6574  | 0.001886  |
| snp_02_15935358 | snp_02_18130541 | 0.270268 | 8.16668 | 0.004267  |
| snp_02_15990619 | snp_02_18130541 | 0.268966 | 6.94872 | 0.008388  |
| snp_02_16074185 | snp_02_17218097 | 0.308757 | 7.07445 | 0.007819  |
| snp_02_16074185 | snp_02_19062328 | 0.235705 | 9.99005 | 0.001574  |
| snp_02_16074185 | snp_02_19186803 | 0.195956 | 6.6448  | 0.009945  |
| snp_02_16074185 | snp_02_19429943 | 0.211975 | 7.06665 | 0.007853  |
| snp_02_16074185 | snp_02_19614069 | 0.198448 | 7.35219 | 0.006698  |
| snp_02_16074185 | snp_02_19703249 | 0.24234  | 11.5396 | 0.0006814 |
| snp_02_16074185 | snp_02_20017408 | 0.194214 | 7.28498 | 0.006953  |
| snp_02_16074185 | snp_02_20017433 | 0.20463  | 7.87508 | 0.005012  |
| snp_02_16074185 | snp_02_20017486 | 0.201766 | 7.72515 | 0.005446  |
| snp_02_16074185 | snp_02_20037230 | 0.183186 | 6.81327 | 0.009048  |
| snp_02_16328549 | snp_02_18067425 | 0.276327 | 7.25502 | 0.00707   |
| snp_02_16328549 | snp_02_19304020 | 0.196844 | 7.03426 | 0.007997  |
| snp_02_16328549 | snp_02_19449660 | 0.204842 | 8.02734 | 0.004608  |
| snp_02_16328549 | snp_02_19659783 | 0.178969 | 6.69075 | 0.009691  |
| snp_02_16473086 | snp_02_19429943 | 0.198388 | 6.9564  | 0.008352  |
| snp_02_16473118 | snp_02_19429943 | 0.195708 | 6.75769 | 0.009335  |
| snp_02_16487977 | snp_02_19429943 | 0.232684 | 8.7946  | 0.003021  |
| snp_02_16487977 | snp_02_19659783 | 0.193548 | 7.0147  | 0.008084  |
| snp_02_16699331 | snp_02_17271333 | 0.283677 | 7.21507 | 0.007229  |
| snp_02_16699331 | snp_02_19186685 | 0.192164 | 7.23128 | 0.007165  |
| snp_02_16699331 | snp_02_19429943 | 0.203581 | 6.71272 | 0.009573  |
| snp_02_16699331 | snp_02_19703249 | 0.202972 | 8.12046 | 0.004377  |

|                 |                 |          |         |           |
|-----------------|-----------------|----------|---------|-----------|
| snp_02_16699586 | snp_02_19186685 | 0.21489  | 7.74772 | 0.005378  |
| snp_02_16699586 | snp_02_19659783 | 0.188762 | 6.99707 | 0.008164  |
| snp_02_16699608 | snp_02_19659783 | 0.181134 | 7.16739 | 0.007424  |
| snp_02_16699608 | snp_02_20017486 | 0.18925  | 6.98546 | 0.008218  |
| snp_02_16810236 | snp_02_19186685 | 0.192986 | 7.16816 | 0.007421  |
| snp_02_16810236 | snp_02_19429943 | 0.207627 | 8.01249 | 0.004646  |
| snp_02_16810236 | snp_02_19513808 | 0.215827 | 8.24844 | 0.004079  |
| snp_02_16810236 | snp_02_19659783 | 0.181619 | 7.0892  | 0.007755  |
| snp_02_17022010 | snp_02_18385163 | 0.349286 | 7.06902 | 0.007843  |
| snp_02_17022047 | snp_02_18385163 | 0.35627  | 7.38036 | 0.006594  |
| snp_02_17037081 | snp_02_19429943 | 0.228561 | 8.53107 | 0.003491  |
| snp_02_17046347 | snp_02_19186685 | 0.213323 | 7.88876 | 0.004974  |
| snp_02_17046347 | snp_02_19487646 | 0.231591 | 8.38815 | 0.003777  |
| snp_02_17046347 | snp_02_19659783 | 0.191677 | 7.10505 | 0.007687  |
| snp_02_17046347 | snp_02_19966766 | 0.226178 | 9.49138 | 0.002065  |
| snp_02_17046347 | snp_02_20009271 | 0.256381 | 12.3051 | 0.0004518 |
| snp_02_17217858 | snp_02_19186685 | 0.223818 | 8.9579  | 0.002763  |
| snp_02_17218097 | snp_02_17593523 | 0.451765 | 12.0519 | 0.0005175 |
| snp_02_17218097 | snp_02_17600915 | 0.342426 | 8.00314 | 0.00467   |
| snp_02_17218097 | snp_02_17781288 | 0.416933 | 11.7679 | 0.0006027 |
| snp_02_17218097 | snp_02_17959252 | 0.342107 | 7.48159 | 0.006233  |
| snp_02_17218097 | snp_02_17986693 | 0.354564 | 7.44024 | 0.006378  |
| snp_02_17218097 | snp_02_18092703 | 0.360932 | 9.98657 | 0.001577  |
| snp_02_17218097 | snp_02_18098101 | 0.320177 | 6.96154 | 0.008328  |
| snp_02_17218097 | snp_02_18120796 | 0.301014 | 8.04381 | 0.004566  |
| snp_02_17218097 | snp_02_18290410 | 0.285377 | 6.96994 | 0.008289  |
| snp_02_17218097 | snp_02_18385163 | 0.363507 | 9.24164 | 0.002366  |
| snp_02_17218097 | snp_02_19685411 | 0.200973 | 7.64347 | 0.005698  |
| snp_02_17218097 | snp_02_19685438 | 0.203131 | 7.66546 | 0.005629  |

|                 |                 |          |         |           |
|-----------------|-----------------|----------|---------|-----------|
| snp_02_17218097 | snp_02_19685439 | 0.195134 | 7.21856 | 0.007215  |
| snp_02_17218127 | snp_02_17593523 | 0.419843 | 10.7267 | 0.001056  |
| snp_02_17218127 | snp_02_17600915 | 0.306386 | 6.76095 | 0.009317  |
| snp_02_17218127 | snp_02_17781288 | 0.397662 | 11.1066 | 0.0008603 |
| snp_02_17218127 | snp_02_17959252 | 0.322561 | 7.03354 | 0.008     |
| snp_02_17218127 | snp_02_17986693 | 0.360931 | 8.32363 | 0.003913  |
| snp_02_17218127 | snp_02_18092703 | 0.365397 | 10.6594 | 0.001095  |
| snp_02_17218127 | snp_02_18098101 | 0.33533  | 7.64324 | 0.005699  |
| snp_02_17218127 | snp_02_18120796 | 0.296068 | 8.23915 | 0.0041    |
| snp_02_17218127 | snp_02_18385163 | 0.361922 | 9.66187 | 0.001881  |
| snp_02_17218127 | snp_02_19429943 | 0.202728 | 6.66966 | 0.009807  |
| snp_02_17218127 | snp_02_19685411 | 0.199695 | 7.73255 | 0.005424  |
| snp_02_17218127 | snp_02_19685438 | 0.201855 | 7.75312 | 0.005362  |
| snp_02_17218127 | snp_02_19685439 | 0.193806 | 7.29595 | 0.006911  |
| snp_02_17258929 | snp_02_18092703 | 0.419356 | 7.52735 | 0.006077  |
| snp_02_17258929 | snp_02_18290444 | 0.287833 | 6.86841 | 0.008773  |
| snp_02_17258929 | snp_02_18385163 | 0.509566 | 10.8066 | 0.001011  |
| snp_02_17258929 | snp_02_19659783 | 0.190494 | 6.79645 | 0.009134  |
| snp_02_17258984 | snp_02_18385163 | 0.478193 | 9.68524 | 0.001858  |
| snp_02_17258984 | snp_02_19659783 | 0.196507 | 7.0825  | 0.007784  |
| snp_02_17259533 | snp_02_18067425 | 0.290783 | 7.91165 | 0.004912  |
| snp_02_17259533 | snp_02_19659783 | 0.197316 | 7.94987 | 0.004809  |
| snp_02_17259650 | snp_02_19304020 | 0.216046 | 7.50843 | 0.006141  |
| snp_02_17259650 | snp_02_19429943 | 0.221836 | 7.15873 | 0.00746   |
| snp_02_17259650 | snp_02_19449660 | 0.190918 | 6.81044 | 0.009063  |
| snp_02_17259650 | snp_02_19659783 | 0.226871 | 10.7926 | 0.001019  |
| snp_02_17259650 | snp_02_20017486 | 0.212543 | 8.90796 | 0.002839  |
| snp_02_17271281 | snp_02_18067425 | 0.278902 | 7.5499  | 0.006001  |
| snp_02_17271281 | snp_02_18385163 | 0.327344 | 7.85558 | 0.005067  |

|                 |                 |           |         |          |
|-----------------|-----------------|-----------|---------|----------|
| snp_02_17271281 | snp_02_19685411 | 0.200707  | 7.66603 | 0.005627 |
| snp_02_17271281 | snp_02_19685438 | 0.203431  | 7.85633 | 0.005064 |
| snp_02_17271281 | snp_02_19685439 | 0.195857  | 7.42652 | 0.006427 |
| snp_02_17271281 | snp_02_19703249 | 0.196421  | 7.74982 | 0.005372 |
| snp_02_17271333 | snp_02_17600915 | 0.299069  | 7.11293 | 0.007653 |
| snp_02_17271333 | snp_02_18067425 | 0.306676  | 8.72876 | 0.003132 |
| snp_02_17271333 | snp_02_18385163 | 0.308328  | 7.15489 | 0.007476 |
| snp_02_17271333 | snp_02_19685438 | 0.185529  | 6.65707 | 0.009876 |
| snp_02_17271333 | snp_02_19703249 | 0.197809  | 7.92662 | 0.004871 |
| snp_02_17416587 | snp_02_17593523 | 0.310519  | 6.75371 | 0.009355 |
| snp_02_17446176 | snp_02_17600915 | 0.341103  | 9.48012 | 0.002077 |
| snp_02_17446176 | snp_02_18067425 | 0.319694  | 7.47705 | 0.006249 |
| snp_02_17446176 | snp_02_19429943 | 0.218075  | 8.80916 | 0.002997 |
| snp_02_17446176 | snp_02_19449660 | 0.196023  | 7.36961 | 0.006634 |
| snp_02_17446176 | snp_02_19659783 | 0.186126  | 7.26528 | 0.00703  |
| snp_02_17446176 | snp_02_21016307 | 0.175492  | 7.00762 | 0.008116 |
| snp_02_17446330 | snp_02_17600915 | 0.30903   | 9.68288 | 0.00186  |
| snp_02_17446330 | snp_02_18067425 | 0.287077  | 7.47849 | 0.006244 |
| snp_02_17446330 | snp_02_18385163 | 0.278851  | 7.07202 | 0.00783  |
| snp_02_17446330 | snp_02_19429943 | 0.209103  | 8.47152 | 0.003608 |
| snp_02_17446330 | snp_02_19449660 | 0.193553  | 7.45957 | 0.00631  |
| snp_02_17446330 | snp_02_19659783 | 0.181224  | 7.20103 | 0.007286 |
| snp_02_17503963 | snp_02_18385163 | 0.317446  | 6.92722 | 0.008489 |
| snp_02_17600915 | snp_02_19062328 | 0.22273   | 7.41618 | 0.006464 |
| snp_02_17600915 | snp_02_19703249 | 0.189375  | 6.76579 | 0.009292 |
| snp_02_17677857 | snp_02_17677891 | -0.477266 | 7.02282 | 0.008048 |
| snp_02_17677891 | snp_02_17677905 | -0.548226 | 8.03874 | 0.004579 |
| snp_02_17677891 | snp_02_18240771 | -0.504732 | 7.43294 | 0.006404 |
| snp_02_17677891 | snp_02_18240912 | -0.513    | 7.67122 | 0.005611 |

|                 |                 |          |         |           |
|-----------------|-----------------|----------|---------|-----------|
| snp_02_17889038 | snp_02_19304020 | 0.221489 | 6.70461 | 0.009616  |
| snp_02_17959252 | snp_02_18067425 | 0.332635 | 7.12184 | 0.007615  |
| snp_02_17959252 | snp_02_19429943 | 0.221099 | 7.76716 | 0.005321  |
| snp_02_17959252 | snp_02_19659783 | 0.195435 | 7.12856 | 0.007587  |
| snp_02_18067425 | snp_02_19186685 | 0.267364 | 12.6243 | 0.0003808 |
| snp_02_18067425 | snp_02_19703249 | 0.203232 | 7.7202  | 0.005461  |
| snp_02_18067425 | snp_02_19860601 | 0.208081 | 8.02423 | 0.004616  |
| snp_02_18098101 | snp_02_19860601 | 0.192025 | 7.01883 | 0.008066  |
| snp_02_18098101 | snp_02_19966766 | 0.187912 | 7.29198 | 0.006926  |
| snp_02_18120796 | snp_02_19186685 | 0.246261 | 10.2738 | 0.001349  |
| snp_02_18290410 | snp_02_18385163 | 0.345928 | 6.81874 | 0.009021  |
| snp_02_18290410 | snp_02_19429943 | 0.210183 | 6.99627 | 0.008168  |
| snp_02_18290410 | snp_02_19703249 | 0.197629 | 7.59478 | 0.005854  |
| snp_02_18290444 | snp_02_18385163 | 0.341594 | 6.91592 | 0.008543  |
| snp_02_18290444 | snp_02_19703249 | 0.190154 | 7.1876  | 0.007341  |
| snp_02_18385163 | snp_02_19304020 | 0.22542  | 7.28801 | 0.006942  |
| snp_02_18385163 | snp_02_19304085 | 0.217331 | 6.69066 | 0.009692  |
| snp_02_18481164 | snp_02_19882259 | 0.197089 | 6.73213 | 0.009469  |
| snp_02_18481164 | snp_02_20017433 | 0.197132 | 7.14137 | 0.007533  |
| snp_02_18481164 | snp_02_20037230 | 0.207717 | 7.95661 | 0.004791  |
| snp_02_18481231 | snp_02_19186685 | 0.204586 | 7.4302  | 0.006414  |
| snp_02_18481231 | snp_02_19487646 | 0.20165  | 6.74454 | 0.009404  |
| snp_02_18481231 | snp_02_19882259 | 0.208148 | 7.49265 | 0.006195  |
| snp_02_18481231 | snp_02_20017433 | 0.207133 | 7.7486  | 0.005376  |
| snp_02_18481231 | snp_02_20037230 | 0.212278 | 8.2511  | 0.004073  |
| snp_02_18711010 | snp_02_19186685 | 0.231048 | 8.67812 | 0.003221  |
| snp_02_18711211 | snp_02_19186685 | 0.221671 | 7.82277 | 0.005159  |
| snp_02_18817286 | snp_02_20017433 | 0.213995 | 6.96504 | 0.008312  |
| snp_02_18817478 | snp_02_19186685 | 0.211109 | 6.77725 | 0.009233  |

|                 |                 |          |         |          |
|-----------------|-----------------|----------|---------|----------|
| snp_02_18817478 | snp_02_20017433 | 0.22116  | 7.43563 | 0.006395 |
| snp_02_18825659 | snp_02_18825730 | 0.42191  | 6.72878 | 0.009487 |
| snp_02_18825659 | snp_02_19429943 | 0.241384 | 7.93862 | 0.004839 |
| snp_02_18825659 | snp_02_19882295 | 0.201768 | 6.73092 | 0.009476 |
| snp_02_18825659 | snp_02_20017433 | 0.224715 | 8.17149 | 0.004256 |
| snp_02_18825659 | snp_02_20019434 | 0.215085 | 6.70253 | 0.009628 |
| snp_02_18825659 | snp_02_20037230 | 0.219671 | 8.4256  | 0.0037   |
| snp_02_18825660 | snp_02_18846852 | 0.277229 | 7.00597 | 0.008124 |
| snp_02_18825660 | snp_02_19091002 | 0.326886 | 7.44942 | 0.006346 |
| snp_02_18825730 | snp_02_18845763 | 0.306788 | 6.7607  | 0.009319 |
| snp_02_18825730 | snp_02_19091002 | 0.298523 | 6.76    | 0.009322 |
| snp_02_18825730 | snp_02_19186685 | 0.227418 | 7.8619  | 0.005049 |
| snp_02_18825730 | snp_02_19429943 | 0.274052 | 10.1784 | 0.001421 |
| snp_02_18825730 | snp_02_19614069 | 0.234714 | 8.3533  | 0.00385  |
| snp_02_18825730 | snp_02_19659783 | 0.208657 | 8.1983  | 0.004193 |
| snp_02_18825730 | snp_02_19882259 | 0.204266 | 6.68266 | 0.009736 |
| snp_02_18825730 | snp_02_19882260 | 0.200727 | 6.66802 | 0.009816 |
| snp_02_18825730 | snp_02_19882295 | 0.215318 | 7.52128 | 0.006098 |
| snp_02_18825730 | snp_02_20017433 | 0.242918 | 9.71999 | 0.001823 |
| snp_02_18825730 | snp_02_20017486 | 0.204851 | 7.487   | 0.006215 |
| snp_02_18825730 | snp_02_20019434 | 0.219004 | 6.90899 | 0.008576 |
| snp_02_18825730 | snp_02_20037230 | 0.234346 | 9.57356 | 0.001974 |
| snp_02_18825730 | snp_02_21016307 | 0.177239 | 6.94744 | 0.008394 |
| snp_02_18845763 | snp_02_20037230 | 0.206412 | 7.62628 | 0.005752 |
| snp_02_18845763 | snp_02_21016307 | 0.175245 | 6.86705 | 0.00878  |
| snp_02_18846101 | snp_02_20017433 | 0.207454 | 7.2979  | 0.006904 |
| snp_02_18846852 | snp_02_19614069 | 0.209206 | 7.53765 | 0.006042 |
| snp_02_18846852 | snp_02_20017433 | 0.194843 | 6.71613 | 0.009555 |
| snp_02_18846852 | snp_02_20017486 | 0.218617 | 9.35205 | 0.002227 |

|                 |                 |          |         |           |
|-----------------|-----------------|----------|---------|-----------|
| snp_02_18848592 | snp_02_20017433 | 0.224692 | 7.89882 | 0.004947  |
| snp_02_19163651 | snp_02_19186685 | 0.293386 | 7.80289 | 0.005216  |
| snp_02_19186685 | snp_02_19487646 | 0.259301 | 7.52121 | 0.006098  |
| snp_02_19186685 | snp_02_19614069 | 0.266706 | 8.73714 | 0.003118  |
| snp_02_19186685 | snp_02_19659783 | 0.228795 | 6.71715 | 0.009549  |
| snp_02_19186685 | snp_02_19755401 | 0.232457 | 6.69495 | 0.009669  |
| snp_02_19186685 | snp_02_20082377 | 0.227971 | 8.0259  | 0.004611  |
| snp_02_19186685 | snp_02_20082383 | 0.22866  | 8.32243 | 0.003916  |
| snp_02_19186685 | snp_02_20082386 | 0.238601 | 9.02683 | 0.002661  |
| snp_02_19304020 | snp_02_19614069 | 0.256676 | 7.08978 | 0.007753  |
| snp_02_19304020 | snp_02_19764675 | 0.273969 | 8.63915 | 0.00329   |
| snp_02_19429943 | snp_02_19513808 | 0.299214 | 7.22609 | 0.007185  |
| snp_02_19429943 | snp_02_20767401 | 0.223135 | 7.32203 | 0.006812  |
| snp_02_19429943 | snp_02_20767410 | 0.226915 | 7.41334 | 0.006474  |
| snp_02_19449660 | snp_02_20767401 | 0.226239 | 7.40287 | 0.006512  |
| snp_02_19449660 | snp_02_20767410 | 0.230613 | 7.6909  | 0.00555   |
| snp_02_19456018 | snp_02_20082383 | 0.228135 | 6.99701 | 0.008165  |
| snp_02_19456018 | snp_02_20082386 | 0.240865 | 7.81711 | 0.005176  |
| snp_02_19614069 | snp_02_19764675 | 0.3529   | 9.88318 | 0.001668  |
| snp_02_19659783 | snp_02_20082377 | 0.284894 | 9.41222 | 0.002156  |
| snp_02_19659783 | snp_02_20082383 | 0.253947 | 7.64984 | 0.005678  |
| snp_02_19659783 | snp_02_20082386 | 0.26543  | 8.70715 | 0.00317   |
| snp_02_19659783 | snp_02_20082615 | 0.229539 | 7.14191 | 0.00753   |
| snp_02_19755401 | snp_02_20082386 | 0.256965 | 7.1013  | 0.007703  |
| snp_02_19860601 | snp_02_20082386 | 0.261596 | 6.80002 | 0.009116  |
| snp_02_20009271 | snp_02_20082377 | 0.329039 | 10.0437 | 0.001529  |
| snp_02_20009271 | snp_02_20082383 | 0.317478 | 9.51938 | 0.002033  |
| snp_02_20009271 | snp_02_20082386 | 0.33627  | 10.8706 | 0.0009772 |
| snp_02_20009271 | snp_02_20082615 | 0.289318 | 8.26809 | 0.004035  |

|                 |                 |          |         |          |
|-----------------|-----------------|----------|---------|----------|
| snp_02_20017292 | snp_02_20037230 | 0.340956 | 9.26805 | 0.002332 |
|-----------------|-----------------|----------|---------|----------|

**Table S5. Candidate genes from significant QTLs based on BSA-seq analysis and targeted association analysis of recombinant inbred lines.**

| QTL                     | Locus          | Annotation                                                          | PVE (%) after targeted association analysis |         |        | Top SNPs                                              | SNP position                                        | Superior allele/s |                 |                           | Inferior allele/s |         |                 |
|-------------------------|----------------|---------------------------------------------------------------------|---------------------------------------------|---------|--------|-------------------------------------------------------|-----------------------------------------------------|-------------------|-----------------|---------------------------|-------------------|---------|-----------------|
|                         |                |                                                                     | GI                                          | AC      | PC     |                                                       |                                                     | Low GI            | Low AC          | High PC                   | High GI           | High AC | Low PC          |
| qseqPC2.2               | LOC_Os02g25930 | retrotransposon                                                     |                                             |         | 3.8316 | snp_02_15220376                                       | exonic<br>(nonsynonymous)                           | TGG               | CAC             | C/TGG<br>or TGG           | CA/GG<br>or CAC   | TGG     | CGC/G           |
|                         |                |                                                                     |                                             | 15.6599 |        | snp_02_15219832<br>snp_02_15219922<br>snp_02_15220376 |                                                     |                   |                 |                           |                   |         |                 |
|                         |                |                                                                     | 10.2007                                     |         |        | snp_02_15219832                                       |                                                     |                   |                 |                           |                   |         |                 |
| qseqPC2.2               | LOC_Os02g26840 | Membrane-bound O-acyltransferase; similar to Wax synthase isoform 1 |                                             | 14.6813 | 3.0375 | snp_02_15760177<br>snp_02_15760221                    | exonic<br>(nonsynonymous)<br>exonic<br>(synonymous) | GG                | TA or<br>T/GA/G | GG                        | TA or<br>T/GA/G   | GG      | TA              |
|                         |                |                                                                     | 11.0165                                     |         |        |                                                       |                                                     |                   |                 |                           |                   |         |                 |
| qseqPC2.2               | LOC_Os02g27000 | OsMORC4; microchidia protein 4                                      |                                             | 13.0116 | 5.5138 | snp_02_15876071                                       | UTR3                                                | T                 | C               | T                         | C                 | T       | C               |
|                         |                |                                                                     | 11.4974                                     |         |        |                                                       |                                                     |                   |                 |                           |                   |         |                 |
| qseqPC2.2               | LOC_Os02g28420 | Pong sub-class transposon                                           |                                             | 15.3939 | 4.2435 | snp_02_16810236                                       | exonic<br>(nonsynonymous)                           | T                 | C               | T                         | C or C/T          | T       | C               |
|                         |                |                                                                     | 11.9259                                     |         |        |                                                       |                                                     |                   |                 |                           |                   |         |                 |
| qseqAC2.2,<br>qseqPC2.2 | LOC_Os02g29070 | cyclin-dependent kinase; tyrosine or lipopolysaccharide kinase      |                                             | 18.0165 | 5.0289 | snp_02_17217858                                       | exonic<br>(nonsynonymous)                           | CTGC              | TCAT            | CC/TA/<br>GT/C or<br>CTGC | TCAT              | CTGC    | CCAT or<br>TCAT |
|                         |                |                                                                     |                                             |         |        | snp_02_17218097<br>snp_02_17218127                    | exonic<br>(synonymous)                              |                   |                 |                           |                   |         |                 |
|                         |                |                                                                     | 10.7473                                     |         |        | snp_02_17218076<br>snp_02_17218097<br>snp_02_17218127 | exonic<br>(synonymous)                              |                   |                 |                           |                   |         |                 |



|                                    |                |                                                             |         |         |                                                       |                                                                                  |                         |                       |     |                         |     |       |   |
|------------------------------------|----------------|-------------------------------------------------------------|---------|---------|-------------------------------------------------------|----------------------------------------------------------------------------------|-------------------------|-----------------------|-----|-------------------------|-----|-------|---|
| qseqAC2.2,<br>qseqPC2.2            | LOC_Os02g29370 | Mariner sub-class<br>transposon                             |         | 5.611   | snp_02_17446176<br>snp_02_17446330                    | upstream                                                                         | CT                      | TC                    | CT  | TT, TC,<br>or<br>T/CC/T | CT  | TC    |   |
|                                    |                |                                                             | 13.5987 | 15.297  |                                                       |                                                                                  |                         |                       |     |                         |     |       |   |
| qseqAC2.2,<br>qseqPC2.2            | LOC_Os02g30210 | <i>OsFBK7</i> ;<br>Galactose<br>oxidase, beta-<br>propeller |         | 4.6291  | snp_02_17959252                                       | exonic<br>(nonsynonymous)                                                        | A                       | C                     | A   | C                       | A   | C     |   |
|                                    |                |                                                             | 11.6581 | 12.6964 |                                                       |                                                                                  |                         |                       |     |                         |     |       |   |
| qseqAC2.2,<br>qseqPC2.2            | LOC_Os02g30940 | Uncharacterized<br>DUF1677                                  |         | 3.9592  | snp_02_18481164<br>snp_02_18481231                    | exonic<br>(nonsynonymous)                                                        | AGT                     | C/<br>AGC/T<br>or CAC | AGT | CAC                     | AGT | CA/GC |   |
|                                    |                |                                                             | 17.1042 |         | snp_02_18481164<br>snp_02_18481190<br>snp_02_18481231 | exonic<br>(nonsynonymous)<br>exonic<br>(nonsynonymous)<br>exonic<br>(synonymous) |                         |                       |     |                         |     |       |   |
|                                    |                |                                                             | 14.0331 |         |                                                       | exonic                                                                           |                         |                       |     |                         |     |       |   |
| qGI2.1,<br>qseqAC2.2,<br>qseqPC2.2 | LOC_Os02g32660 | <i>OsSBEIIb</i> ;<br>starch branching<br>enzyme IIb         | 57.82   | 59.1407 | 7.9419                                                | snp_02_19362520                                                                  | exon-intron<br>junction | A                     | G   | A                       | G   | A     | G |

**Table S6.1 Putative metabolites detected in negative mode for HAHP and LALP F5-derived F6 RILs.**

| m/z       | RT [min] | Molecular Weight | Compound name                  | QC_1      | QC_2      | QC_3      | HAHP1     | HAHP2     | HAHP3     | LALP1     | LALP2     | LALP3     |
|-----------|----------|------------------|--------------------------------|-----------|-----------|-----------|-----------|-----------|-----------|-----------|-----------|-----------|
| 87.0074   | 0.812    | 88.01485         | Pyruvic acid                   | 2971.1014 | 2943.7646 | 2869.0883 | 1570.2205 | 2603.6087 | 1410.9737 | 3028.6423 | 3355.6461 | 4274.7051 |
| 89.02305  | 0.815    | 90.03048         | L-Lactic acid                  | 367.78657 | 374.42063 | 330.86793 | 416.90908 | 396.22568 | 309.32433 | 282.03002 | 267.00506 | 369.72788 |
| 94.97953  | 0.863    | 95.98686         | Silicic acid                   | 35.598277 | 32.685672 | 39.431852 | 34.5227   | 37.624354 | 47.294076 | 45.72856  | 59.386825 | 57.608275 |
| 96.96827  | 0.865    | 97.97556         | Phosphate                      | 4963.1768 | 5101.8622 | 4931.5414 | 4664.1113 | 5020.8519 | 4536.8525 | 4095.3354 | 4657.0094 | 6024.1997 |
| 103.00237 | 0.837    | 104.00976        | Malonic acid                   | 139.23454 | 132.88352 | 128.3369  | 207.40363 | 182.51301 | 202.20415 | 123.01623 | 235.64482 | 141.65202 |
| 111.00747 | 1.217    | 112.01475        | 2-Furoic acid                  | 296.55319 | 292.68581 | 322.45888 | 439.60179 | 250.99798 | 272.68987 | 119.08194 | 169.4565  | 171.3057  |
| 111.01866 | 0.817    | 112.0263         | Uracil                         | 321.87315 | 296.11879 | 308.67385 | 396.52976 | 429.63923 | 279.80492 | 194.09741 | 249.97114 | 228.03387 |
| 114.0548  | 0.806    | 115.06231        | L-Proline                      | 65.357202 | 71.196062 | 65.918851 | 69.71384  | 78.464255 | 70.297523 | 90.8045   | 66.038249 | 71.983189 |
| 115.00239 | 0.812    | 116.00969        | Maleic acid                    | 128.85513 | 128.64123 | 109.14247 | 74.722673 | 161.36703 | 139.8161  | 171.2778  | 143.67144 | 176.6485  |
| 115.03882 | 1.995    | 116.04611        | Levulinic acid                 | 57.787785 | 68.551073 | 50.33577  | 50.75918  | 46.215611 | 61.31359  | 200.83936 | 114.90877 | 147.09463 |
| 116.07045 | 14.557   | 117.07773        | L-Valine                       | 70.422818 | 72.531744 | 70.265138 | 80.737279 | 69.546846 | 117.89148 | 54.906214 | 87.326268 | 89.942625 |
| 117.01816 | 1.425    | 118.02538        | Methylmalonic acid             | 225.79782 | 233.57242 | 237.87793 | 282.36873 | 239.47878 | 197.2025  | 338.55249 | 244.11206 | 216.55508 |
| 117.05446 | 3.18     | 118.06177        | 2-Methyl-3-hydroxybutyric acid | 73.039728 | 71.730663 | 72.585133 | 59.275106 | 52.305928 | 42.877159 | 40.696796 | 52.841544 | 36.759259 |
| 119.03374 | 0.8      | 120.04139        | Erythrose                      | 663.96274 | 515.51702 | 681.14391 | 497.25725 | 756.70134 | 360.99727 | 241.87504 | 253.83259 | 672.2797  |
| 119.04906 | 4.617    | 120.05632        | Phenylacetaldehyde             | 88.811898 | 89.998295 | 81.727189 | 68.30627  | 99.844701 | 70.851511 | 112.53598 | 94.736341 | 82.01818  |
| 121.02831 | 4.381    | 122.0356         | Benzoic acid                   | 341.84572 | 383.6249  | 277.78545 | 268.59997 | 514.58366 | 461.9026  | 358.17219 | 445.05358 | 265.55656 |
| 122.02354 | 1.231    | 123.0308         | Nicotinic acid                 | 169.97061 | 125.47412 | 141.84126 | 223.78068 | 107.50263 | 119.03374 | 79.12494  | 153.84941 | 147.79006 |
| 128.03409 | 1.231    | 129.04139        | Pyroglutamic acid              | 1121.5522 | 1074.6007 | 1172.5273 | 1742.3257 | 1358.0421 | 1179.0854 | 782.88707 | 1005.65   | 1130.9562 |
| 129.01816 | 0.8      | 130.02538        | Citraconic acid                | 1421.593  | 1564.3772 | 1270.0418 | 1794.2587 | 1452.6469 | 1427.1539 | 716.12911 | 1113.8485 | 1228.3653 |
| 130.0498  | 0.81     | 131.05733        | N-Acetyl-L-alanine             | 143.49904 | 145.0819  | 130.62515 | 181.43953 | 156.70903 | 137.6985  | 136.57353 | 158.32796 | 133.63996 |
| 130.08614 | 1.331    | 131.09345        | Leucine                        | 178.06962 | 174.22467 | 177.26872 | 360.40768 | 207.89997 | 159.11642 | 120.25805 | 129.24256 | 140.70768 |
| 131.04504 | 0.729    | 132.05232        | L-Asparagine                   | 1910.0191 | 2119.6111 | 1933.1324 | 1727.2512 | 2009.7071 | 2958.0112 | 1538.7412 | 1898.3222 | 2197.3282 |
| 131.07025 | 4.301    | 132.07751        | 6-Hydroxycaproic acid          | 338.59199 | 342.13    | 311.57719 | 236.98006 | 175.23747 | 115.05906 | 121.45137 | 161.11266 | 139.91503 |
| 132.02902 | 0.876    | 133.03629        | L-Aspartic acid                | 801.65791 | 199.33602 | 1002.4597 | 2453.4246 | 2353.9716 | 1674.901  | 874.0577  | 1522.1866 | 1508.4412 |
| 133.01309 | 0.811    | 134.02038        | Malic acid                     | 3026.0816 | 3001.8825 | 2929.0189 | 1529.6452 | 2694.9041 | 1476.1396 | 3181.4465 | 3456.808  | 4416.1273 |
| 179.05531 | 0.802    | 134.05709        | Deoxyribose                    | 603.07008 | 470.37418 | 575.79065 | 443.32217 | 698.19649 | 325.04648 | 219.48214 | 222.9208  | 632.23818 |
| 134.04596 | 1.505    | 135.05333        | Adenine                        | 56.919528 | 54.56575  | 51.945123 | 89.257249 | 55.145963 | 66.946224 | 49.815941 | 72.887614 | 60.432366 |
| 135.02876 | 0.841    | 136.03641        | Threonic acid                  | 6902.3685 | 7635.3792 | 7956.2956 | 7341.8832 | 10183.682 | 8557.6049 | 6560.9179 | 9658.1997 | 9584.9591 |
| 137.02328 | 5.457    | 138.0306         | Salicylic acid                 | 583.95988 | 642.49348 | 554.63253 | 821.47099 | 454.44042 | 490.1333  | 454.2676  | 552.20339 | 592.78957 |
| 137.03455 | 1.258    | 138.0418         | Urocanic acid                  | 13.550317 | 11.875058 | 15.725494 | 15.514168 | 14.165584 | 22.1778   | 12.241563 | 17.020604 | 17.759108 |

|           |        |           |                                     |           |           |           |           |           |           |           |           |           |
|-----------|--------|-----------|-------------------------------------|-----------|-----------|-----------|-----------|-----------|-----------|-----------|-----------|-----------|
| 144.0291  | 0.845  | 145.03644 | 2-Keto-glutaramic acid              | 198.20914 | 205.42312 | 201.10856 | 259.1076  | 188.41701 | 251.21298 | 154.4724  | 210.45636 | 176.97248 |
| 144.06551 | 0.794  | 145.07322 | Allysine                            | 111.28408 | 107.15768 | 104.58588 | 129.2896  | 112.67887 | 105.52374 | 115.61596 | 121.18207 | 130.21257 |
| 145.01311 | 0.799  | 146.02078 | Oxoglutaric acid                    | 27626.545 | 28296.085 | 22846.902 | 46998.593 | 28734.384 | 29938.321 | 13160.095 | 23226.68  | 26768.106 |
| 145.04953 | 3.137  | 146.05685 | Adipic acid                         | 167.80032 | 180.19336 | 154.31866 | 152.01426 | 131.19577 | 183.40575 | 196.88597 | 156.95332 | 180.6561  |
| 146.04478 | 0.785  | 147.05206 | L-Glutamic acid                     | 1168.4692 | 970.6961  | 1159.1361 | 1864.8593 | 1334.1595 | 1720.6557 | 1674.7489 | 1099.8114 | 1042.8004 |
| 147.02884 | 0.8    | 148.03617 | Citramalic acid                     | 210.64539 | 216.48242 | 193.91685 | 185.51942 | 159.9473  | 153.7226  | 144.72557 | 111.07648 | 169.02387 |
| 147.06526 | 1.53   | 148.07254 | Mevalonic acid                      | 61.634341 | 68.819681 | 58.528421 | 49.02953  | 30.676902 | 61.684176 | 34.598987 | 38.711475 | 34.253247 |
| 148.04272 | 1.231  | 149.05    | L-Methionine                        | 23.405296 | 21.242899 | 23.665229 | 34.639125 | 24.345014 | 26.013847 | 17.979852 | 17.88894  | 19.817875 |
| 149.00818 | 14.684 | 150.01543 | Tartaric acid                       | 131.97912 | 88.173065 | 124.65053 | 168.03326 | 118.235   | 172.82186 | 77.961555 | 174.3156  | 172.73225 |
| 149.04437 | 0.773  | 150.05201 | Xylose                              | 6868.3525 | 7797.5203 | 8081.4547 | 7407.3218 | 10289.927 | 8646.5879 | 6705.4283 | 9780.8004 | 9684.3952 |
| 151.03903 | 4.727  | 152.04635 | Vanillin                            | 84.083549 | 87.472    | 88.161903 | 159.89998 | 123.01026 | 85.772334 | 89.858023 | 68.349449 | 106.48399 |
| 151.06015 | 0.798  | 152.06754 | L-Arabitol                          | 450.9738  | 562.62403 | 375.43484 | 429.95153 | 101.71002 | 902.96271 | 211.48909 | 107.79461 | 276.12038 |
| 153.01833 | 4.22   | 154.02563 | Gentisic acid                       | 274.5955  | 252.18155 | 284.20248 | 386.14236 | 239.2667  | 315.25288 | 307.99397 | 280.51884 | 261.78774 |
| 154.06111 | 0.72   | 155.06847 | L-Histidine                         | 169.66624 | 185.8478  | 167.06947 | 255.37738 | 191.3574  | 184.58851 | 78.129256 | 154.08255 | 157.55854 |
| 157.03574 | 0.814  | 158.04297 | Allantoin                           | 935.71063 | 895.93897 | 941.48863 | 1199.4603 | 1086.8292 | 943.81097 | 593.36832 | 883.18284 | 895.20364 |
| 159.02879 | 0.797  | 160.03648 | Oxoadipic acid                      | 281.04868 | 287.91077 | 274.47229 | 193.50033 | 321.18152 | 265.14049 | 276.9595  | 297.96221 | 315.7605  |
| 159.06535 | 3.896  | 160.07263 | Pimelic acid                        | 261.70281 | 196.2688  | 299.29014 | 229.23452 | 243.91034 | 275.04373 | 244.80001 | 388.41568 | 264.38997 |
| 160.06061 | 0.811  | 161.0679  | Aminoadipic acid                    | 211.71132 | 209.43125 | 233.56416 | 239.82696 | 254.46546 | 240.84705 | 201.06552 | 197.40513 | 216.34612 |
| 162.01863 | 1.458  | 163.02648 | Acetylcysteine                      | 1887.6946 | 1943.3276 | 1917.8971 | 761.19193 | 1174.5639 | 1441.944  | 3109.29   | 2463.6756 | 2526.2534 |
| 164.07074 | 2.311  | 165.07805 | L-Phenylalanine                     | 326.32124 | 197.41967 | 212.33298 | 288.95313 | 216.90471 | 207.32557 | 169.68573 | 333.33779 | 189.3344  |
| 165.01839 | 3.909  | 166.02567 | Phthalic acid                       | 57.081956 | 52.975612 | 49.778641 | 40.598977 | 123.86844 | 4810.8465 | 118.64119 | 98.516409 | 80.169905 |
| 165.03946 | 0.765  | 166.0468  | L-Xyloic acid                       | 1534.5928 | 1277.6538 | 1641.6516 | 655.15524 | 1441.2686 | 1117.7263 | 1155.8386 | 1193.6298 | 1235.6946 |
| 165.05478 | 4.756  | 166.06205 | 3-Phenyllactic acid                 | 53.021062 | 54.696381 | 51.852798 | 11.214254 | 9.7055531 | 8.3836269 | 10.964253 | 7.228318  | 9.7246214 |
| 165.07597 | 0.817  | 166.08314 | Rhamnitol                           | 12.993282 | 15.921097 | 10.932744 | 9.5112537 | 12.745106 | 8.7392965 | 12.95766  | 12.962153 | 8.6842312 |
| 166.01697 | 0.864  | 167.02429 | Homocysteinesulfinic acid           | 114.95268 | 88.852128 | 144.13871 | 106.55695 | 114.64693 | 107.47808 | 171.40951 | 173.04224 | 180.299   |
| 169.01331 | 14.491 | 170.02056 | Gallic acid                         | 23.268607 | 13.671524 | 29.080252 | 29.870421 | 14.510236 | 19.285161 | 16.124395 | 18.676256 | 21.689504 |
| 171.00551 | 0.857  | 172.01273 | Glycerol 3-phosphate                | 276.14409 | 270.91643 | 275.79154 | 325.0219  | 322.72185 | 350.96212 | 300.75155 | 401.89838 | 361.87995 |
| 171.10175 | 5.935  | 172.10908 | Butyl levulinate                    | 174.52765 | 154.59337 | 210.52956 | 164.96142 | 400.11778 | 350.2693  | 161.59576 | 143.27218 | 116.06543 |
| 172.06068 | 0.824  | 173.0681  | N-Acetyl-L-glutamate 5-semialdehyde | 121.66687 | 122.77357 | 123.67634 | 127.322   | 137.10042 | 135.14848 | 111.07717 | 120.05265 | 109.73152 |
| 173.00822 | 0.801  | 174.01556 | Dehydroascorbic acid                | 460.96005 | 376.10761 | 535.47227 | 741.48805 | 540.31279 | 507.71949 | 267.10918 | 317.60368 | 424.2712  |
| 173.08109 | 4.619  | 174.08836 | Suberic acid                        | 198.58641 | 205.66798 | 194.99315 | 282.47549 | 292.72758 | 348.32004 | 289.09694 | 222.59964 | 223.96387 |
| 173.10347 | 0.709  | 174.11082 | L-Arginine                          | 318.01111 | 329.48819 | 306.34915 | 553.39424 | 370.13421 | 327.72659 | 202.4214  | 350.25198 | 314.6999  |
| 173.11751 | 5.447  | 174.12475 | 3-Hydroxynonanoic acid              | 85.320118 | 81.542401 | 88.710796 | 117.97175 | 244.21486 | 104.99295 | 57.625203 | 84.210314 | 95.307894 |

|           |        |           |                           |           |           |           |           |           |           |           |           |           |
|-----------|--------|-----------|---------------------------|-----------|-----------|-----------|-----------|-----------|-----------|-----------|-----------|-----------|
| 174.05519 | 5.575  | 175.0625  | Indoleacetic acid         | 55.217724 | 53.116613 | 58.063599 | 28.131387 | 41.836755 | 41.722142 | 51.287065 | 63.229216 | 56.602076 |
| 175.06058 | 1.232  | 176.0679  | 2-Isopropylmalic acid     | 12.974952 | 12.045703 | 12.919397 | 12.075729 | 13.312797 | 15.163717 | 12.483998 | 14.59385  | 15.430834 |
| 177.03957 | 0.799  | 178.0472  | Gluconolactone            | 658.19365 | 594.73878 | 635.71541 | 643.66757 | 728.80856 | 593.58499 | 553.90323 | 594.06674 | 587.87167 |
| 179.03416 | 4.009  | 180.04149 | Caffeic acid              | 326.28063 | 309.55932 | 325.29192 | 793.43123 | 69.163872 | 412.21528 | 171.22065 | 271.7774  | 244.78902 |
| 179.05534 | 0.798  | 180.06257 | D-Glucose                 | 579.06958 | 441.46778 | 562.93036 | 396.39425 | 672.13946 | 327.15371 | 203.25275 | 215.93474 | 596.8571  |
| 181.0499  | 6.461  | 182.05718 | Hydroxyphenyllactic acid  | 73.042785 | 74.239395 | 72.222385 | 15.870016 | 68.027322 | 83.365315 | 78.235858 | 53.447479 | 58.602106 |
| 181.07097 | 0.778  | 182.07825 | Mannitol                  | 639.4032  | 871.33888 | 511.97949 | 875.85756 | 707.19366 | 1385.383  | 289.827   | 595.94129 | 822.56072 |
| 182.04507 | 1.686  | 183.05248 | 4-Pyridoxic acid          | 73.283008 | 73.274581 | 70.820296 | 66.033913 | 68.612925 | 54.937924 | 71.296329 | 74.225301 | 73.615242 |
| 183.10187 | 7.394  | 184.10919 | Oleuropeic acid           | 71.30507  | 69.758085 | 71.408905 | 72.148315 | 71.043177 | 61.112702 | 64.616595 | 72.38196  | 69.298248 |
| 187.09674 | 5.314  | 188.1041  | Azelaic acid              | 895.65422 | 929.82462 | 883.06322 | 1514.1574 | 1838.9722 | 1896.4192 | 1064.9206 | 916.24439 | 946.80279 |
| 187.13322 | 8.067  | 188.1405  | 3-Hydroxydecanoic acid    | 8.0064699 | 8.4027148 | 7.5107607 | 22.179068 | 11.877907 | 20.258518 | 11.435166 | 12.791122 | 12.303342 |
| 188.05586 | 1.256  | 189.06305 | N-Acetyl-L-glutamic acid  | 81.877487 | 77.384491 | 77.810135 | 78.184073 | 80.0481   | 59.659986 | 44.874366 | 54.531698 | 54.922344 |
| 191.01891 | 0.8    | 192.02626 | Citric acid               | 27825.605 | 28380.433 | 23140.073 | 47496.574 | 28982.199 | 30178.279 | 13208.889 | 23187.295 | 26902.77  |
| 191.05531 | 10.343 | 192.06263 | Quinic acid               | 1850.2905 | 1503.0099 | 367.30164 | 2062.6988 | 1702.9312 | 1608.2194 | 1185.2795 | 1945.4251 | 2357.7103 |
| 193.04994 | 4.854  | 194.05724 | Ferulic acid              | 1077.8968 | 1070.9371 | 1044.1572 | 1013.1219 | 1073.2793 | 836.39203 | 921.65132 | 1088.8162 | 1065.8025 |
| 195.05038 | 0.761  | 196.05757 | Gluconic acid             | 6808.2304 | 7506.0057 | 7853.6329 | 7162.6319 | 10035.447 | 8418.2654 | 6461.1648 | 9519.0079 | 9412.7953 |
| 198.03217 | 3.214  | 199.03941 | DL-o-Chlorophenylalanine  | 5608.7924 | 5788.108  | 5458.3842 | 7356.9722 | 5046.0462 | 6797.3156 | 5004.3278 | 6424.9564 | 5839.6168 |
| 203.0191  | 0.816  | 204.02643 | Daucic acid               | 280.72963 | 285.30833 | 267.87484 | 277.24466 | 255.18839 | 242.84256 | 391.35517 | 308.17582 | 227.54491 |
| 203.08191 | 3.175  | 204.08921 | L-Tryptophan              | 1526.1036 | 1501.3611 | 1636.4586 | 1829.48   | 1519.1915 | 1306.9144 | 498.75536 | 899.29861 | 997.5456  |
| 204.06601 | 4.968  | 205.07333 | Indolelactic acid         | 119.40895 | 122.06415 | 119.44662 | 4.4163903 | 4.3290622 | 3.2141619 | 4.4235587 | 4.6537589 | 5.9672536 |
| 209.0296  | 0.825  | 210.03688 | Glucaric acid             | 114.19727 | 119.48101 | 115.61219 | 159.02185 | 157.32557 | 113.34638 | 59.802648 | 73.361009 | 103.65303 |
| 209.06606 | 0.798  | 210.07336 | D-manno-2-Heptulose       | 162.62741 | 157.01741 | 144.6462  | 159.86615 | 180.68081 | 140.07033 | 166.73266 | 182.98304 | 172.77542 |
| 211.1335  | 7.71   | 212.14078 | Traumatin                 | 10.722026 | 12.958499 | 9.2280754 | 11.893454 | 27.71439  | 17.885887 | 16.673988 | 8.9025586 | 14.08247  |
| 213.01665 | 0.848  | 214.02418 | 5-Deoxyribose-1-phosphate | 827.17594 | 857.51283 | 869.18126 | 911.44906 | 833.77528 | 667.7104  | 983.0402  | 654.26685 | 1018.6402 |
| 214.07147 | 3.225  | 215.0788  | Kinetin                   | 20.615557 | 19.105016 | 19.828014 | 8.927841  | 12.415637 | 14.904622 | 20.340152 | 17.228302 | 14.706277 |
| 214.14445 | 5.605  | 215.15171 | N-Nonanoylglycine         | 8.8704268 | 9.6579917 | 8.6819703 | 100.49034 | 8.4851842 | 243.00514 | 86.2502   | 117.36495 | 27.243026 |
| 215.12836 | 6.622  | 216.13566 | Undecanedioic acid        | 78.158386 | 77.03754  | 73.822521 | 118.97629 | 68.489999 | 120.00366 | 157.46195 | 94.815269 | 103.73992 |
| 216.05099 | 0.762  | 217.05826 | Lycoperdic acid           | 1018.3661 | 724.40421 | 1161.2015 | 1382.4291 | 822.60369 | 1642.8442 | 47.834432 | 1432.2782 | 1275.4606 |
| 218.10292 | 2.754  | 219.11021 | Pantothenic acid          | 1081.0644 | 1094.1518 | 1069.2989 | 684.88668 | 1147.2643 | 870.61771 | 1436.3631 | 1094.5749 | 1187.991  |
| 219.07695 | 1.656  | 220.08425 | 5-Hydroxy-L-tryptophan    | 142.75311 | 148.22093 | 132.49233 | 137.5748  | 122.41004 | 97.926549 | 206.16343 | 146.9552  | 152.56555 |
| 220.08218 | 0.795  | 221.08973 | N-Acetyl-D-glucosamine    | 670.26127 | 611.13092 | 602.16664 | 589.90057 | 995.00171 | 462.90317 | 793.96275 | 566.4081  | 628.47841 |
| 221.06619 | 0.797  | 222.07392 | Ethyl glucuronide         | 2142.9485 | 2450.3117 | 2046.1449 | 2114.6511 | 1878.6876 | 1830.4864 | 2041.3872 | 2505.0409 | 2178.9235 |
| 223.06078 | 4.832  | 224.06808 | Sinapic acid              | 162.77527 | 166.96751 | 153.50997 | 93.9728   | 45.625486 | 122.04069 | 179.18565 | 176.48779 | 179.90165 |

|           |        |           |                                |           |           |           |           |           |           |           |           |           |
|-----------|--------|-----------|--------------------------------|-----------|-----------|-----------|-----------|-----------|-----------|-----------|-----------|-----------|
| 223.13351 | 7.922  | 224.14079 | Methyl jasmonate               | 10.97513  | 10.502272 | 11.196838 | 12.716152 | 18.555006 | 11.632954 | 12.188403 | 13.531763 | 8.4635084 |
| 225.18562 | 11.664 | 226.19284 | Myristoleic acid               | 35.645231 | 40.944141 | 37.962323 | 28.709347 | 25.378914 | 29.09034  | 47.046721 | 42.813694 | 61.820291 |
| 227.12852 | 5.741  | 228.13578 | Traumatic acid                 | 21.439978 | 22.053742 | 21.093512 | 20.986459 | 49.961136 | 26.710034 | 16.010433 | 12.86856  | 10.755225 |
| 227.20119 | 12.355 | 228.20845 | Myristic acid                  | 117.04771 | 125.67015 | 116.82202 | 104.63019 | 81.336639 | 98.2344   | 137.83297 | 145.61437 | 180.85647 |
| 228.16017 | 6.207  | 229.16745 | N-Decanoylglycine              | 15.454622 | 15.713923 | 15.008827 | 91.275189 | 10.745141 | 141.66904 | 35.951286 | 53.752648 | 17.719315 |
| 229.14427 | 7.24   | 230.15155 | Dodecanedioic acid             | 15.665348 | 16.781383 | 14.389765 | 16.736729 | 14.22851  | 20.361601 | 19.725904 | 17.773174 | 17.951927 |
| 236.07733 | 0.791  | 237.08484 | Fructoseglycine                | 684.30483 | 681.17455 | 691.36477 | 560.53219 | 686.37488 | 603.5315  | 606.09354 | 535.15983 | 550.16883 |
| 239.07695 | 0.763  | 240.08424 | D-glycero-L-galacto-Octulose   | 465.31625 | 429.99228 | 453.53924 | 428.3222  | 495.18052 | 462.40587 | 335.2716  | 371.16826 | 448.82048 |
| 242.07954 | 0.782  | 243.08706 | Cytidine                       | 326.78922 | 196.34248 | 734.73861 | 196.4353  | 923.96049 | 1120.1306 | 905.03644 | 224.70901 | 840.91267 |
| 242.17589 | 6.781  | 243.18318 | N-Undecanoylglycine            | 167.09664 | 169.17929 | 161.52938 | 1527.2149 | 118.8701  | 4273.3874 | 1297.1965 | 1663.878  | 254.40566 |
| 243.06187 | 1.232  | 244.06941 | Uridine                        | 368.1088  | 374.46445 | 359.2512  | 446.96875 | 340.82174 | 329.36973 | 373.0007  | 401.28697 | 476.58128 |
| 243.19633 | 10.474 | 244.20362 | 2-Hydroxymyristic acid         | 117.75764 | 130.7863  | 114.14842 | 130.61223 | 119.79613 | 106.28177 | 123.03593 | 135.80027 | 142.57583 |
| 245.04295 | 0.747  | 246.05029 | Glycerophosphoglycerol         | 724.21014 | 754.01019 | 831.45753 | 803.07275 | 569.45426 | 972.00895 | 713.64562 | 842.92949 | 435.85555 |
| 245.13933 | 4.718  | 246.1466  | Dibutyl malate                 | 26.282186 | 27.188694 | 25.77327  | 31.244515 | 91.541704 | 68.347654 | 9.6118883 | 7.672293  | 10.788776 |
| 247.11867 | 4.374  | 248.1259  | Prenyl glucoside               | 20.785507 | 23.425512 | 18.596733 | 22.820965 | 51.860129 | 33.885821 | 19.112324 | 18.128932 | 33.180174 |
| 253.21713 | 12.58  | 254.22442 | Palmitoleic acid               | 185.88025 | 214.00132 | 205.43859 | 116.55726 | 146.63137 | 125.63648 | 272.3361  | 155.84967 | 220.41223 |
| 255.05096 | 3.457  | 256.0583  | Piscidic acid                  | 28.481297 | 28.572917 | 31.121041 | 66.41668  | 30.600855 | 30.770798 | 11.894793 | 26.950647 | 29.224844 |
| 255.23293 | 14.52  | 256.24018 | Palmitic acid                  | 1019.0985 | 1058.3708 | 997.01778 | 826.31184 | 818.61987 | 789.08778 | 1229.4855 | 952.55362 | 1332.0493 |
| 256.13016 | 1.569  | 257.13748 | Coumaperine                    | 29.007675 | 29.638321 | 28.414232 | 26.365476 | 27.131789 | 29.137566 | 34.06794  | 27.050653 | 31.22328  |
| 257.17581 | 8.414  | 258.18311 | Tetradecanedioic acid          | 10.284325 | 12.851303 | 9.3704111 | 7.0518532 | 6.4330398 | 7.8103947 | 5.780667  | 6.5138323 | 6.8556182 |
| 257.21213 | 11.612 | 258.21942 | 3-hydroxypentadecanoic acid    | 10.059174 | 13.636116 | 9.8514033 | 4.9872891 | 5.7672083 | 6.5040624 | 10.926876 | 1.9100532 | 9.194699  |
| 258.03815 | 0.844  | 259.04569 | Glucosamine 6-phosphate        | 63.977285 | 60.699048 | 62.795392 | 60.25702  | 72.648346 | 55.297597 | 48.530649 | 48.131213 | 76.107193 |
| 259.02234 | 0.848  | 260.02962 | Glucose 1-phosphate            | 784.03379 | 806.71848 | 829.80407 | 856.089   | 775.2565  | 550.91313 | 810.10564 | 464.9829  | 920.35318 |
| 260.02347 | 1.299  | 261.03069 | 2-Methoxyacetaminophen sulfate | 17.077493 | 17.334187 | 17.140098 | 19.927484 | 14.224255 | 16.400059 | 10.726992 | 16.879458 | 13.458706 |
| 263.09735 | 1.159  | 264.10454 | Phenylacetylglutamine          | 54.555151 | 59.797827 | 45.116416 | 51.790087 | 53.403821 | 52.99205  | 52.63108  | 62.590818 | 70.284319 |
| 263.129   | 5.997  | 264.13624 | Abscisic acid                  | 17.377439 | 17.108095 | 17.237209 | 22.422235 | 7.3179847 | 47.211615 | 9.199438  | 11.868915 | 6.5622099 |
| 265.14795 | 11.048 | 266.15521 | 4'-Dihydroabscisic acid        | 524.96952 | 533.79156 | 593.72112 | 419.40128 | 416.86195 | 349.95549 | 522.3369  | 386.30465 | 937.49734 |
| 269.08792 | 0.742  | 270.0952  | Histidylaspartic acid          | 59.953319 | 66.626063 | 60.242081 | 66.31998  | 68.249438 | 88.134699 | 34.733982 | 36.789795 | 46.29741  |
| 269.21222 | 10.905 | 270.21956 | 3-Oxohexadecanoic acid         | 264.23719 | 281.01615 | 270.41443 | 133.18633 | 194.36006 | 180.75755 | 220.84713 | 213.20755 | 314.75875 |
| 271.22791 | 10.011 | 272.23522 | 16-Hydroxyhexadecanoic acid    | 407.65903 | 401.78491 | 410.54721 | 509.85309 | 569.78697 | 408.13135 | 565.67666 | 516.04196 | 452.62754 |
| 274.10449 | 1.227  | 275.11187 | N-gamma-Glutamylglutamine      | 16.410822 | 20.233925 | 16.741963 | 34.069613 | 21.724563 | 21.34744  | 11.36162  | 26.001556 | 15.651984 |
| 275.10388 | 4.404  | 276.11123 | N-lactoyl-Tryptophan           | 58.759989 | 60.546552 | 60.909778 | 78.913074 | 29.812022 | 38.97216  | 45.073123 | 69.632871 | 35.914411 |
| 277.21704 | 12.225 | 278.22444 | alpha-Linolenic acid           | 2940.2279 | 3007.4159 | 3057.3561 | 2750.8989 | 2397.0373 | 1946.7633 | 3934.8957 | 2394.1952 | 3302.8609 |

|           |        |           |                                      |           |           |           |           |           |           |           |           |           |
|-----------|--------|-----------|--------------------------------------|-----------|-----------|-----------|-----------|-----------|-----------|-----------|-----------|-----------|
| 278.10349 | 4.556  | 279.11076 | Niazirin                             | 5.6867056 | 6.1037403 | 5.0768416 | 3.0549011 | 2.6325881 | 7.146062  | 5.8966497 | 18.027496 | 4.7184228 |
| 279.10864 | 2.864  | 280.11587 | Asparynyol                           | 23.470485 | 22.967755 | 23.224878 | 27.624822 | 21.890644 | 27.639116 | 12.473602 | 20.374624 | 21.300593 |
| 279.23291 | 12.835 | 280.24013 | Linoleic acid                        | 3305.4104 | 3786.156  | 3828.1061 | 2925.1578 | 2348.1074 | 2362.2563 | 3545.6723 | 3201.2572 | 3385.3004 |
| 281.08777 | 0.806  | 282.09515 | Xylobiose                            | 7864.4763 | 7777.1128 | 7592.3038 | 6817.7619 | 6888.0964 | 6486.3124 | 6366.4834 | 6899.1419 | 6505.2488 |
| 281.2486  | 14.523 | 282.25586 | Oleic acid                           | 2430.8364 | 2467.5246 | 2177.3173 | 2049.1005 | 1604.7074 | 1825.8551 | 2849.4882 | 2318.3787 | 2950.2356 |
| 282.08438 | 1.491  | 283.0917  | Guanosine                            | 97.142201 | 96.35028  | 101.37267 | 212.08812 | 85.995763 | 77.74972  | 78.736998 | 88.444462 | 93.086057 |
| 283.26419 | 10.483 | 284.27152 | Stearic acid                         | 1986.6034 | 2385.5405 | 1926.05   | 1233.8796 | 1668.9527 | 1494.7282 | 1360.3817 | 501.47131 | 1673.9835 |
| 285.20703 | 9.596  | 286.21431 | Hexadecanedioic acid                 | 111.25389 | 119.20951 | 107.99435 | 47.894001 | 53.685345 | 41.241122 | 65.877213 | 43.414806 | 74.448552 |
| 287.22284 | 7.153  | 288.23018 | (S)-10,16-Dihydroxyhexadecanoic acid | 314.07055 | 340.68039 | 281.9935  | 321.16324 | 376.97502 | 312.00725 | 506.19551 | 339.95957 | 432.12622 |
| 289.07196 | 4.053  | 290.07922 | Catechin                             | 23.002116 | 22.137209 | 21.978806 | 28.735487 | 21.844277 | 53.499685 | 17.745748 | 94.50062  | 27.525004 |
| 297.24332 | 10.56  | 298.25069 | Ricinoleic acid                      | 2432.8739 | 2542.1084 | 2569.7025 | 2992.9742 | 2583.0326 | 2133.6818 | 3937.1152 | 2890.9174 | 2684.8512 |
| 299.20178 | 11.56  | 300.20894 | all-trans-Retinoic acid              | 438.6118  | 500.23531 | 437.62402 | 548.59403 | 307.54999 | 506.7546  | 434.43034 | 449.33296 | 463.11944 |
| 299.25903 | 11.543 | 300.26633 | 12-Hydroxystearic acid               | 103.64465 | 102.43262 | 102.74426 | 105.08453 | 120.41844 | 89.595579 | 92.157852 | 115.04443 | 180.35094 |
| 300.99905 | 4.622  | 302.00634 | Ellagic acid                         | 42.253364 | 41.006471 | 37.746691 | 39.498834 | 40.474232 | 57.520181 | 33.936243 | 58.900733 | 48.868671 |
| 301.20209 | 6.993  | 302.20937 | 8-Hydroxyhexadecanedioic acid        | 67.567125 | 68.346985 | 65.003218 | 45.354179 | 83.591346 | 52.501418 | 67.277539 | 25.069819 | 39.918956 |
| 303.11975 | 0.798  | 304.12701 | 2'-Deoxymugineic acid                | 653.72353 | 651.70441 | 763.93565 | 1297.7675 | 873.133   | 1002.7619 | 166.31311 | 458.01283 | 850.2082  |
| 306.07666 | 0.8    | 307.08395 | Glutathione                          | 418.36092 | 487.25502 | 467.87133 | 391.55824 | 220.96742 | 233.08775 | 434.83205 | 301.12291 | 331.26565 |
| 309.27994 | 11.342 | 310.28726 | 9Z-Eicosenoic acid                   | 1518.6156 | 2169.8929 | 1411.7621 | 884.52561 | 1011.1358 | 987.2093  | 704.37091 | 1121.7425 | 1287.9238 |
| 311.09857 | 0.799  | 312.10579 | 4-O-beta-D-Galactopyranosyl-D-xylose | 4411.8868 | 4541.3322 | 4450.6245 | 4068.2418 | 3667.5425 | 3813.4151 | 3778.7891 | 3397.5345 | 3875.8536 |
| 311.16879 | 12.566 | 312.17607 | N-Undecylbenzenesulfonic acid        | 94.305434 | 120.62914 | 110.64903 | 40.074822 | 44.851182 | 97.140607 | 65.824354 | 80.759906 | 62.0056   |
| 311.22293 | 10.652 | 312.23018 | 8(R)-Hydroperoxylinoleic acid        | 1884.9151 | 1749.3549 | 2319.1268 | 1866.4693 | 2598.3057 | 2325.1135 | 1392.7702 | 1665.3416 | 1568.2751 |
| 311.2955  | 14.086 | 312.30284 | Arachidic acid                       | 70.786076 | 80.246203 | 70.280991 | 45.331376 | 47.584734 | 39.929694 | 41.65245  | 50.847351 | 57.449395 |
| 317.05475 | 0.849  | 318.06206 | Melanin                              | 55.225463 | 58.633061 | 31.930087 | 50.773751 | 55.770808 | 52.140341 | 68.194872 | 46.925637 | 76.680785 |
| 323.18649 | 6.181  | 324.19376 | Cibacic acid                         | 11.278597 | 11.582342 | 12.138305 | 14.988127 | 51.586307 | 41.563604 | 3.2985601 | 5.5586295 | 4.5601856 |
| 327.21786 | 8.431  | 328.22513 | Corchorifatty acid F                 | 563.69928 | 569.158   | 608.90206 | 488.53125 | 792.06967 | 739.77902 | 421.26933 | 444.2448  | 498.58118 |
| 332.12546 | 3.95   | 333.13265 | Glutamyltryptophan                   | 15.359657 | 13.410491 | 16.72919  | 24.768608 | 13.725717 | 16.62619  | 2.5309589 | 7.4174901 | 6.8972249 |
| 333.05933 | 0.837  | 334.06661 | Glycerophosphoinositol               | 502.49841 | 506.9112  | 503.53039 | 467.01021 | 639.43136 | 558.96963 | 423.12082 | 646.27348 | 536.86666 |
| 339.32669 | 12.423 | 340.33401 | Behenic acid                         | 64.715438 | 58.414779 | 59.456538 | 101.97969 | 2.6976909 | 65.064284 | 91.533109 | 83.913958 | 66.256199 |
| 341.10889 | 0.8    | 342.11588 | Maltose                              | 79311.077 | 55356.383 | 90323.208 | 62007.286 | 83284.338 | 92093.006 | 99927.259 | 93029.791 | 72430.424 |
| 343.12454 | 1.238  | 344.13214 | Lactitol                             | 46.705047 | 22.047379 | 66.615824 | 24.279946 | 71.013071 | 20.229807 | 24.642949 | 55.145724 | 19.778272 |
| 358.25198 | 11.511 | 359.25923 | 2-Hydroxy-lauroylcarnitine           | 476.18976 | 517.1018  | 522.85352 | 465.33726 | 519.09024 | 334.65793 | 295.37575 | 318.44354 | 367.60143 |
| 380.25732 | 10.483 | 381.2646  | Sphinganine 1-phosphate              | 29.324643 | 35.774857 | 27.522006 | 31.168653 | 27.221392 | 25.811146 | 26.897739 | 24.988847 | 33.93157  |
| 393.13058 | 4.096  | 394.13786 | N-Acetylserotonin glucuronide        | 4.5966849 | 4.2622236 | 4.7158124 | 3.3638662 | 1.6744821 | 3.0326213 | 10.607967 | 8.0975351 | 4.0058453 |

|           |        |           |                                  |           |           |           |           |           |           |           |           |           |
|-----------|--------|-----------|----------------------------------|-----------|-----------|-----------|-----------|-----------|-----------|-----------|-----------|-----------|
| 413.25443 | 9.007  | 414.26185 | Ascorbyl palmitate               | 26.7427   | 27.880279 | 27.457241 | 48.387986 | 30.376233 | 12.222053 | 19.401076 | 20.432289 | 20.162054 |
| 417.28595 | 11.059 | 418.29317 | Palmitoyl glucuronide            | 47.148139 | 48.366764 | 50.968381 | 45.188611 | 45.390654 | 22.090267 | 45.296548 | 43.389995 | 43.222814 |
| 441.07227 | 0.907  | 442.07956 | 3-Galloylcatechin                | 109.56823 | 116.97156 | 107.38494 | 155.90502 | 110.61669 | 32.357679 | 151.59591 | 116.44111 | 138.04948 |
| 452.27768 | 10.081 | 453.28463 | LysoPE(16:0/0:0)                 | 11684.193 | 11468.926 | 12779.223 | 12789.771 | 10791.031 | 10642.464 | 10959.699 | 10977.478 | 10654.411 |
| 472.14545 | 2.969  | 473.15299 | Dhurrin 6'-glucoside             | 24.098336 | 25.125405 | 25.846789 | 36.527954 | 10.195317 | 28.406012 | 3.723905  | 4.9595774 | 5.8232066 |
| 472.15869 | 3.094  | 473.16593 | Folinic acid                     | 136.3422  | 130.59314 | 140.75803 | 231.95954 | 122.50267 | 109.44542 | 88.707495 | 77.170685 | 104.6214  |
| 476.27777 | 9.666  | 477.28504 | LysoPE(18:2(9Z,12Z)/0:0)         | 13724.999 | 14986.55  | 13267.652 | 13288.797 | 10915.383 | 10927.171 | 12423.345 | 11721.227 | 13145.872 |
| 478.2934  | 10.428 | 479.30067 | LysoPE(18:1(11Z)/0:0)            | 3142.7804 | 3330.0427 | 3374.9157 | 2512.0815 | 2789.6109 | 2982.5863 | 3885.4484 | 3268.3838 | 2598.3532 |
| 492.12802 | 3.195  | 493.1353  | Malvidin 3-glucoside             | 35.788846 | 37.995524 | 35.449981 | 49.550659 | 35.965088 | 39.560336 | 35.672134 | 27.270872 | 38.911471 |
| 503.16187 | 0.793  | 504.16921 | Raffinose                        | 2753.5452 | 3174.1581 | 2558.0772 | 4303.3758 | 2027.9939 | 2021.2529 | 2779.9771 | 2824.3865 | 2680.0892 |
| 511.30392 | 14.47  | 512.31142 | 1-Stearoylglycerophosphoglycerol | 145.29152 | 157.0434  | 110.79747 | 128.47731 | 109.17783 | 128.27604 | 97.422098 | 65.841222 | 101.6791  |
| 580.15228 | 3.978  | 581.15948 | Cyanidin 3-sambubioside          | 93.697683 | 99.470567 | 98.469571 | 103.41054 | 82.719002 | 77.181245 | 76.867645 | 73.397145 | 76.110949 |

**Table S6.2 Label and designation of the samples**

| <b>Label</b> | <b>Designation</b>           | <b>Remarks</b>                            | <b>Generation</b> |
|--------------|------------------------------|-------------------------------------------|-------------------|
| HAHP1        | IR 122297-B                  | Parent: High amylose and protein content  | Parent 1          |
| HAHP2        | IR 122297-B-4130-1-1 RGA-B   | High amylose content bulk                 | F6                |
| HAHP3        | IR 122297-B-4110-1-1 RGA-B   | High protein content bulk                 | F6                |
| LALP1        | SAMBA MAHSURI::IRGC 117377-1 | Parent: Lower amylose and protein content | Parent 2          |
| LALP2        | IR 122297-B-4323-1-1 RGA-B   | Low amylose content bulk                  | F6                |
| LALP3        | IR 122297-B-4356-1-1 RGA-B   | Low protein content bulk                  | F6                |



**Table S7.1 Color parameters of HAHP\_101 and Samba Mahsuri.**

| Sample        | Parameter | Technical replicate |       |       | Average |
|---------------|-----------|---------------------|-------|-------|---------|
|               |           | 1                   | 2     | 3     |         |
| ULGI SI 101   | L*        | 78.36               | 78.36 | 78.51 | 78.41   |
| ULGI SI 101   | a*        | 1.73                | 1.75  | 1.72  | 1.73    |
| ULGI SI 101   | b*        | 17.04               | 17.03 | 17.1  | 17.06   |
| Samba Mahsuri | L*        | 81.72               | 81.74 | 81.76 | 81.74   |
| Samba Mahsuri | a*        | 0.76                | 0.78  | 0.8   | 0.78    |
| Samba Mahsuri | b*        | 15.62               | 15.63 | 15.61 | 15.62   |

**Table S7.2 Amino acid profile of Samba Mahsuri and HAHP.**

| AMINO ACID    | Samba Mahsuri (g/100 g) |        |        |        |       | HAHP_101 (g/100 g) |        |        |        |       |
|---------------|-------------------------|--------|--------|--------|-------|--------------------|--------|--------|--------|-------|
|               | A1_1                    | A1_2   | A1_3   | AVE    | SD    | B1_1               | B1_2   | B1_3   | AVE    | SD    |
| Alanine       | 1.293                   | 1.301  | 1.397  | 1.330  | 0.058 | 1.117              | 1.153  | 1.112  | 1.127  | 0.022 |
| Arginine      | 2.663                   | 2.699  | 2.859  | 2.740  | 0.104 | 2.869              | 2.884  | 2.906  | 2.886  | 0.019 |
| Aspartic acid | 13.879                  | 14.188 | 14.603 | 14.223 | 0.363 | 2.766              | 2.883  | 2.881  | 2.843  | 0.067 |
| Cysteine      | 0.000                   | 0.177  | 0.587  | 0.255  | 0.301 | 0.000              | 0.211  | 0.000  | 0.070  | 0.122 |
| Glutamic acid | 5.125                   | 5.097  | 5.065  | 5.096  | 0.030 | 3.321              | 3.500  | 3.266  | 3.362  | 0.123 |
| Glycine       | 7.193                   | 7.505  | 8.062  | 7.587  | 0.440 | 1.711              | 1.337  | 1.098  | 1.382  | 0.309 |
| Histidine     | 3.112                   | 3.225  | 3.271  | 3.203  | 0.082 | 3.462              | 3.433  | 3.411  | 3.436  | 0.026 |
| Isoleucine    | 2.577                   | 2.750  | 2.625  | 2.651  | 0.089 | 2.913              | 2.990  | 2.984  | 2.962  | 0.043 |
| Leucine       | 1.923                   | 2.052  | 1.959  | 1.978  | 0.066 | 2.173              | 2.231  | 2.226  | 2.210  | 0.032 |
| Lysine        | 11.841                  | 12.222 | 12.543 | 12.202 | 0.351 | 14.240             | 14.203 | 14.135 | 14.193 | 0.053 |
| Methionine    | 2.368                   | 2.455  | 2.404  | 2.409  | 0.044 | 2.569              | 2.612  | 2.534  | 2.572  | 0.039 |
| Phenylalanine | 2.660                   | 2.727  | 2.669  | 2.686  | 0.036 | 2.956              | 2.908  | 2.986  | 2.950  | 0.039 |
| Proline       | 2.353                   | 2.362  | 2.363  | 2.359  | 0.005 | 2.525              | 2.602  | 2.605  | 2.577  | 0.046 |
| Serine        | 8.651                   | 8.634  | 8.617  | 8.634  | 0.017 | 3.052              | 3.230  | 3.092  | 3.125  | 0.093 |
| Threonine     | 4.036                   | 4.077  | 4.221  | 4.111  | 0.098 | 1.074              | 1.170  | 1.122  | 1.122  | 0.048 |
| Tyrosine      | 4.887                   | 5.027  | 5.044  | 4.986  | 0.086 | 5.395              | 5.584  | 5.613  | 5.530  | 0.118 |
| Valine        | 2.494                   | 2.553  | 2.416  | 2.488  | 0.069 | 2.656              | 2.637  | 2.720  | 2.671  | 0.044 |

**Table S8. Metabolomics of low, ultra-low, and high glycemic index rice**

**Experiment title: Metabolomics of low, ultra-low, and high glycemic index rice**

**Organism/Plant species: Rice**

**Organ/tissue: Seed**

**Analytical tool: LC-MS**

Peak no.- number referenced back to the main text

Ret . Time- Retention time, in minutes (difference in Ret.Time between ES(+) and ES(-) modes was less than XX minutes)

Putative Name- putative identification of the metabolite

Mol. Formula- molecular formula of the metabolite or its FA adduct;

Theor. m/z- theoretical monoisotopic mass calculated for the ion (M-H)<sup>-</sup>, (M+H)<sup>+</sup> or (M+FA)<sup>-</sup>

Found m/z- mass detected in the experiment

m/z error (ppm)- difference between theoretical and found m/z values in ppm

MSMS fragments- fragments, obtained from the ion (M-H)<sup>-</sup>, (M+H)<sup>+</sup> or (M+FA)<sup>-</sup>

MS/MS CE (eV)- collision energy used for fragmentation optional

UV/Vis- UV/ Vis absorbance maxima

() FA- formic acid adduct

(S)- identification confirmed by a standard compound

I, II, III- different isomers

Identification level (A; B; C)- (A) standard or NMR; (B(i)) confident match based on MS/MS and (B(ii)) confident match using in-silico MS/MS approaches and (B(iii)) partial match based on MS/MS and (C(i)) confident match based on MS<sup>n</sup> and (C(ii)) confident match using in-silico MS<sup>n</sup> approaches and (C(iii)) partial match based on MS<sup>n</sup>; (D) MS only

International identifie (\*optional): identifier from database such such as: HMDB, KEGG, PubChem, KNApSack, ect.

| Peak no. | Ret._Time  | Putative_metabolite_name                | ES_Found_m.z | Identification level (A-D) |
|----------|------------|-----------------------------------------|--------------|----------------------------|
| 1        | 2.72529445 | (S)-6-Oxo-2-piperidinecarboxylic acid   | 142.050097   | B(i)                       |
| 2        | 6.43453719 | 1-methoxy-3-indolylmethyl-glucosinolate | 477.068091   | B(i)                       |
| 3        | 4.53091078 | 12-Crown-4                              | 175.096841   | B(i)                       |
| 4        | 12.6038491 | 13-HPODE                                | 311.222948   | B(i)                       |

|    |            |                                                 |            |      |
|----|------------|-------------------------------------------------|------------|------|
| 5  | 4.75966341 | 2-Isopropylmalic acid                           | 175.060445 | B(i) |
| 6  | 4.75751301 | 2,3-Dimethylsuccinic acid                       | 145.04969  | B(i) |
| 7  | 2.53234992 | 2'-Deoxyuridine                                 | 227.067216 | B(i) |
| 8  | 2.25681461 | 3-Hydroxy-3-Methylglutaric acid                 | 161.044804 | B(i) |
| 9  | 4.09466238 | 3-Methylglutaric acid                           | 145.049859 | B(i) |
| 10 | 5.27737796 | 3,4-Dihydroxyhydrocinnamic acid                 | 181.047543 | B(i) |
| 11 | 2.0568386  | 3,4-Dihydroxyphenylacetic acid                  | 167.03423  | B(i) |
| 12 | 9.49353689 | 3,4,5triCQA                                     | 677.151494 | B(i) |
| 13 | 2.88110634 | 4-Hydroxy-3-Methoxymandelic acid                | 197.045155 | B(i) |
| 14 | 4.19533369 | 4-Hydroxymethyl-3-methoxyphenoxyacetic acid     | 211.060722 | B(i) |
| 15 | 6.43453719 | 4-Methoxyglucobrassicin                         | 477.068091 | B(i) |
| 16 | 6.38690289 | 4-O-pcoumaroylshikimic acid                     | 319.046041 | B(i) |
| 17 | 4.28737062 | 4,8-Dihydroxyquinoline-2-carboxylic acid        | 204.029813 | B(i) |
| 18 | 5.50283917 | 5,6-Dimethylbenzimidazole                       | 145.086049 | B(i) |
| 19 | 12.8809071 | 5,7-Dihydroxy-4'-methoxyisoflavone              | 283.061475 | B(i) |
| 20 | 2.57172644 | 6-Hydroxynicotinic acid                         | 138.01869  | B(i) |
| 21 | 2.8774067  | 6,7 Dimethylrihityl lumazine                    | 325.107874 | B(i) |
| 22 | 14.1216174 | 9-hydroxy-(10E, 12Z, 15Z)-octadecatrienoic acid | 295.227742 | B(i) |
| 23 | 2.74057875 | Adenosine 3',5'-cyclic monophosphate            | 328.045613 | B(i) |
| 24 | 4.18805087 | Adipic acid                                     | 145.049552 | A    |
| 25 | 3.33102927 | Alanyisoleucine                                 | 201.123959 | B(i) |
| 26 | 3.61562546 | Alanyleucine                                    | 201.124006 | B(i) |
| 27 | 2.24380784 | Alanymethionine                                 | 219.081268 | B(i) |
| 28 | 4.31841546 | Alanyphenylalanine                              | 235.108663 | B(i) |
| 29 | 5.0777297  | Alanytryptophan                                 | 274.120156 | B(i) |
| 30 | 2.95429225 | Alanytyrosine                                   | 251.103872 | B(i) |
| 31 | 1.85406146 | Alanyvaline                                     | 187.108231 | B(i) |
| 32 | 14.6454736 | alpha-Tocopherol acetate                        | 471.380526 | A    |
| 33 | 6.02590311 | Ampelopsin                                      | 319.046244 | B(i) |
| 34 | 10.8902895 | Aphidicolin                                     | 337.238526 | B(i) |

|    |            |                                               |            |      |
|----|------------|-----------------------------------------------|------------|------|
| 35 | 10.4941687 | Apigenin                                      | 269.045757 | A    |
| 36 | 7.81596589 | Apigenin-7-O-glucoside                        | 431.098568 | A    |
| 37 | 3.14501039 | Arginyphenylalanine                           | 320.173017 | B(i) |
| 38 | 3.21716531 | Asparaginysoleucine                           | 244.129918 | B(i) |
| 39 | 3.46352684 | asparaginy-leucine                            | 244.130234 | B(i) |
| 40 | 1.99141419 | Asparaginy-methionine                         | 262.087264 | B(i) |
| 41 | 4.12912955 | Asparaginyphenylalanine                       | 278.114746 | B(i) |
| 42 | 4.95802566 | AsparaginyTryptophan                          | 317.125812 | B(i) |
| 43 | 3.04313943 | Asparaginytyrosine                            | 294.109854 | B(i) |
| 44 | 3.7086634  | Aspartyleucine                                | 245.114409 | B(i) |
| 45 | 4.38822911 | Aspartyphenylalanine                          | 279.098776 | B(i) |
| 46 | 5.19591044 | Aspartytryptophan                             | 318.109605 | B(i) |
| 47 | 3.07818743 | Aspartytyrosine                               | 295.093785 | B(i) |
| 48 | 1.99056767 | Aspartyvaline                                 | 231.098688 | B(i) |
| 49 | 8.27541874 | Astragalin                                    | 447.093894 | B(i) |
| 50 | 12.1391813 | beta-hydroxycapric acid                       | 187.133259 | B(i) |
| 51 | 13.4475872 | beta-Hydroxylauric acid                       | 215.164606 | B(i) |
| 52 | 12.4567497 | beta-Hydroxypalmitic acid                     | 271.228155 | B(i) |
| 53 | 5.83403076 | Biotin                                        | 243.084768 | A    |
| 54 | 9.85556035 | C-hexosyl-luteolin O-hexoside                 | 611.329103 | B(i) |
| 55 | 5.38127025 | Caffeic acid                                  | 179.026154 | A    |
| 56 | 11.1120426 | Caffeoyl spermidine derivative                | 242.176123 | B(i) |
| 57 | 5.47869715 | caffeoylquinic acid derivatives               | 515.130826 | B(i) |
| 58 | 4.41902283 | CafHex1_3.87_341.0879                         | 341.08794  | B(i) |
| 59 | 4.63143777 | CafHex2_4.09_341.0879                         | 341.087942 | B(i) |
| 60 | 4.89495677 | Catechin                                      | 289.072057 | A    |
| 61 | 4.85770639 | chlorogenic acid_Saleh_standards_353.088_4.91 | 353.087933 | A    |
| 62 | 5.1927152  | Chlorogenic acid deriv.                       | 353.088225 | B(i) |
| 63 | 5.59093995 | Chrysoeriol 5-O-hexoside                      | 461.109508 | A    |
| 64 | 14.7367607 | cinnamic acid derivative                      | 265.146947 | B(i) |

|    |             |                                                                    |            |      |
|----|-------------|--------------------------------------------------------------------|------------|------|
| 65 | 1.86167464  | Citramalic acid                                                    | 147.029072 | B(i) |
| 66 | 7.35216396  | coumarin derivatives                                               | 147.044224 | B(i) |
| 67 | 5.01535338  | Cyanidin-3-O-glucoside                                             | 465.103942 | A    |
| 68 | 4.75430451  | Cyanidin-3-O-sophoroside                                           | 609.146915 | A    |
| 69 | 4.41066121  | Delphinidin-3-O-galactoside                                        | 463.088828 | A    |
| 70 | 4.75430451  | delphinidin-3-O-rutinoside<br>chloride_Saleh_standards_609.15_4.74 | 609.146915 | A    |
| 71 | 6.54869795  | Desthiobiotin                                                      | 213.124014 | B(i) |
| 72 | 11.07111162 | Dexamethasone                                                      | 391.189622 | B(i) |
| 73 | 14.0940057  | dieonic acid derivatives                                           | 311.222867 | B(i) |
| 74 | 5.74934953  | Dihydromyricetin                                                   | 319.045877 | A    |
| 75 | 13.1058569  | dihydroxy-octadecenoic acid II                                     | 311.222986 | B(i) |
| 76 | 9.69737368  | FA 12:0 (Lauric acid=                                              | 181.049919 | B(i) |
| 77 | 5.21183889  | FerHex2_4.65_355.1031                                              | 355.103642 | B(i) |
| 78 | 5.7503605   | FerHex3_5.17_355.1031                                              | 355.103639 | B(i) |
| 79 | 7.13681361  | Ferulic acid                                                       | 193.049957 | A    |
| 80 | 4.4939367   | feruloyl-O-sinapoyl-O-caffeoylquinic acid                          | 735.158898 | B(i) |
| 81 | 4.70386835  | Flavine adenine dinucleotide (FAD)                                 | 784.151209 | B(i) |
| 82 | 9.92357716  | fragment ofC-hexosyl-luteolin O-hexoside                           | 299.019889 | B(i) |
| 83 | 3.63341359  | GABA                                                               | 143.118098 | A    |
| 84 | 2.60648638  | gallic acid                                                        | 169.013505 | A    |
| 85 | 12.1413753  | Gibberellin A4                                                     | 331.15537  | A    |
| 86 | 3.55265226  | Glutaminyleucine                                                   | 258.146201 | B(i) |
| 87 | 4.20843846  | GlutaminyPhenylalanine                                             | 292.130656 | B(i) |
| 88 | 5.00472612  | Glutaminytryptophan                                                | 331.141281 | B(i) |
| 89 | 3.02682628  | Glutaminytyrosine                                                  | 308.125812 | B(i) |
| 90 | 1.92297999  | Glutaminyvaline                                                    | 244.130292 | B(i) |
| 91 | 3.51478795  | Glutamyisoleucine                                                  | 259.130282 | B(i) |
| 92 | 3.77559307  | Glutamyleucine                                                     | 259.130178 | B(i) |
| 93 | 2.56043077  | Glutamymethionine                                                  | 277.086737 | B(i) |

|     |            |                                         |            |      |
|-----|------------|-----------------------------------------|------------|------|
| 94  | 5.20380932 | Glutamytryptophan                       | 332.125569 | B(i) |
| 95  | 3.43040928 | Glycyl-L-isoleucine                     | 187.108176 | B(i) |
| 96  | 2.06959861 | Glycyl-L-methionine                     | 205.064828 | B(i) |
| 97  | 4.26147104 | Glycyl-L-phenylalanine                  | 221.092698 | B(i) |
| 98  | 5.01658724 | Glycyl-L-tryptophan                     | 260.104187 | B(i) |
| 99  | 2.93102129 | Glycyl-L-tyrosine                       | 237.088025 | B(i) |
| 100 | 1.9577088  | Glycyl-L-valine                         | 173.092582 | B(i) |
| 101 | 2.71607965 | Guanosine                               | 282.084832 | A    |
| 102 | 4.34617828 | H5FeruGlc1_3.92_371.0983                | 371.098832 | B(i) |
| 103 | 8.29240829 | Hesperetin-7-O-glucoside                | 463.125275 | A    |
| 104 | 7.88811867 | hesperidine_Saleh_standards_609.18_7.93 | 609.183252 | A    |
| 105 | 13.8741927 | Hexadecanoic acid                       | 315.254081 | A    |
| 106 | 9.43998208 | Homoeriodictyol                         | 301.035633 | A    |
| 107 | 3.27123969 | Homogentisic acid                       | 167.034124 | A    |
| 108 | 8.00933224 | Hydroxygallic acid derivatives          | 187.096804 | B(i) |
| 109 | 6.26089284 | Indole-3-acetamide                      | 173.080928 | B(i) |
| 110 | 2.71629754 | Inosine                                 | 267.073755 | A    |
| 111 | 7.71706352 | Is3G_7.29_477.103                       | 477.104293 | B(i) |
| 112 | 7.24686956 | Is3G2-A_6.79_609.1467                   | 609.146819 | B(i) |
| 113 | 7.52703643 | Is3G6-R_7.02_623.1614                   | 623.162698 | B(i) |
| 114 | 5.68157823 | Is3G6-R7G_5.22_785.2141                 | 785.215684 | B(i) |
| 115 | 1.85100139 | Isoleucine                              | 130.086372 | A    |
| 116 | 2.67895298 | Isoleucyalanine                         | 201.124024 | B(i) |
| 117 | 1.96672713 | Isoleucyaspatic acid                    | 245.114519 | B(i) |
| 118 | 2.61506614 | Isoleucyglutamic acid                   | 259.130175 | B(i) |
| 119 | 2.03880042 | Isoleucyglutamine                       | 258.146169 | B(i) |
| 120 | 5.02183202 | Isoleucyisoleucine                      | 243.171436 | B(i) |
| 121 | 5.43993065 | Isoleucyleucine                         | 243.171449 | B(i) |
| 122 | 4.39092519 | Isoleucymethionine                      | 261.127875 | B(i) |
| 123 | 6.16207074 | Isoleucyphenylalanine                   | 277.155849 | B(i) |

|     |            |                                                         |            |      |
|-----|------------|---------------------------------------------------------|------------|------|
| 124 | 2.04579083 | Isoleucythreonine                                       | 231.134934 | B(i) |
| 125 | 6.45597315 | Isoleucytryptophan                                      | 316.166867 | B(i) |
| 126 | 3.9446567  | Isoleucyvaline                                          | 229.155489 | B(i) |
| 127 | 10.9635509 | isorhamnetin                                            | 315.051321 | B(i) |
| 128 | 7.71706352 | Isorhamnetin-3-O-glucoside_Saleh_standards_477.1_7.81   | 477.104293 | B(i) |
| 129 | 7.52703643 | Isorhamnetin-3-O-rutinoside                             | 623.162698 | B(i) |
| 130 | 7.52703643 | Isorhamnetin-3-O-rutinoside_Saleh_standards_623.16_7.54 | 623.162698 | B(i) |
| 131 | 7.71706352 | isorhamnetin-o-glucoside                                | 477.104293 | A    |
| 132 | 6.91752695 | isovitexin_Saleh_standards_431.1_6.93                   | 431.098589 | A    |
| 133 | 7.69817172 | K3G_7.13_447.0926                                       | 447.093657 | B(i) |
| 134 | 6.68207521 | K3G7G_6.14_609.1462                                     | 609.147028 | B(i) |
| 135 | 9.20042743 | Kaempferol                                              | 287.056376 | A    |
| 136 | 6.54597124 | Kaempferol 3-O-glucoside 7-O-rhamnoside                 | 593.151735 | A    |
| 137 | 5.70166373 | Kaempferol 3-O-rhamnoside-7-O-glucoside                 | 593.150449 | B(i) |
| 138 | 7.46133783 | Kaempferol-3-O-?-rutinoside_Saleh_standards_593.15_7.4  | 593.151717 | B(i) |
| 139 | 7.69817172 | Kaempferol-3-O-Glucoside_Saleh_standards_447.09_7.66    | 447.093657 | B(i) |
| 140 | 9.41690576 | kaempferol-3-rhamnosyhexose                             | 593.130534 | B(i) |
| 141 | 7.69817172 | Kaempferol-7-O-Glucoside_Saleh_standards_447.09_7.76    | 447.093657 | B(i) |
| 142 | 9.41690576 | kaempferol-glycosides derv.                             | 593.130534 | B(i) |
| 143 | 7.59907709 | kaempferol-glycosides dervi                             | 755.185127 | B(i) |
| 144 | 8.35098004 | KGRAFer_7.93_901.2408                                   | 901.241381 | B(i) |
| 145 | 2.72474289 | Leu-Gly-Gly                                             | 244.130244 | B(i) |
| 146 | 2.04427217 | Leucine                                                 | 130.086352 | A    |
| 147 | 2.84300894 | Leucyalanine                                            | 201.124031 | B(i) |
| 148 | 2.12818065 | Leucyaspatic acid                                       | 245.114516 | B(i) |
| 149 | 2.76016579 | Leucyglutamic acid                                      | 259.130302 | B(i) |



|     |            |                        |            |      |
|-----|------------|------------------------|------------|------|
| 150 | 5.31548417 | Leucisoleucine         | 243.171593 | B(i) |
| 151 | 5.73086931 | Leucyleucine           | 243.171426 | B(i) |
| 152 | 2.92202581 | Leucylglycine          | 187.108237 | B(i) |
| 153 | 4.73291997 | Leucymethionine        | 261.12455  | B(i) |
| 154 | 2.35612468 | Leucythreonine         | 231.13491  | B(i) |
| 155 | 6.75092152 | Leucytryptophan        | 316.166878 | B(i) |
| 156 | 4.56365792 | Leucytyrosine          | 293.151094 | B(i) |
| 157 | 4.1893087  | Leucyvaline            | 229.155474 | B(i) |
| 158 | 10.8156861 | Luteolin 6-C glucoside | 449.275567 | A    |
| 159 | 6.71820466 | Luzonoid               | 479.120067 | B(i) |
| 160 | 13.9245211 | Lyso PC 18:2           | 564.330891 | B(i) |
| 161 | 13.3209169 | LysoPC 14:0            | 512.299609 | B(i) |
| 162 | 14.3843877 | LysoPC 18:1            | 566.346616 | B(i) |
| 163 | 1.93526213 | Lysyleucine            | 258.18257  | B(i) |
| 164 | 2.90343754 | Lysyphenylalanine      | 292.167295 | B(i) |
| 165 | 3.78214219 | Lysytryptophan         | 331.170871 | B(i) |
| 166 | 5.13791647 | Methionyleucine        | 261.128622 | B(i) |
| 167 | 1.82579097 | Methionylglycine       | 205.073135 | B(i) |
| 168 | 4.10622795 | Methionymethionine     | 279.084951 | B(i) |
| 169 | 4.13046646 | Methionytyrosine       | 311.107467 | B(i) |
| 170 | 3.76994147 | Methionyvaline         | 247.112291 | B(i) |
| 171 | 13.0685159 | Methyl jasmonate       | 223.133506 | B(i) |
| 172 | 2.7379693  | Mevalonic acid lactone | 129.054462 | B(i) |
| 173 | 8.86250012 | Morin                  | 301.035697 | B(i) |
| 174 | 8.32661769 | Myricetin              | 317.066708 | A    |
| 175 | 2.69404157 | N-Acetyl-L-Cysteine    | 162.018199 | B(i) |
| 176 | 4.49168272 | N-Acetyl-L-Methionine  | 190.053721 | B(i) |
| 177 | 4.52281823 | N-Acetyl-L-Tyrosine    | 222.077063 | B(i) |
| 178 | 2.4885891  | N-Acetylmuramic acid   | 292.104333 | B(i) |
| 179 | 4.03404838 | N-Formyl-L-Methionine  | 176.038083 | B(i) |

|     |            |                                                  |            |      |
|-----|------------|--------------------------------------------------|------------|------|
| 180 | 10.381224  | Naringenin chalcone                              | 271.061363 | A    |
| 181 | 7.83597261 | Naringin                                         | 579.172302 | A    |
| 182 | 8.11347108 | Neohesperidin                                    | 609.18307  | A    |
| 183 | 7.8473711  | NG1_7.39_433.1136                                | 433.114106 | B(i) |
| 184 | 15.5273905 | oleic acid derivatives                           | 339.233002 | B(i) |
| 185 | 7.03743964 | P35GG_6.64_597.18                                | 597.183188 | A    |
| 186 | 13.7225105 | Palmitic acid or Hexadecanate                    | 315.254111 | B(i) |
| 187 | 3.78344614 | Panthenol                                        | 204.123712 | A    |
| 188 | 3.64898002 | Pantothenic acid (Vitamine B5)                   | 218.103081 | A    |
| 189 | 3.4432793  | peak107_Gentesic acid-glucoside_315.0720515_3.55 | 315.072292 | A    |
| 190 | 3.71769583 | Coumaroylgalactarate_355.067_3.73                | 355.070719 | B(i) |
| 191 | 3.7407738  | Phaseoloidin_329.0875_3.74                       | 329.087627 | B(i) |
| 192 | 3.71537603 | Phenylalanyalanine                               | 235.108642 | B(i) |
| 193 | 2.56168142 | Phenylalanyarginine                              | 320.173171 | B(i) |
| 194 | 2.80002789 | Phenylalanyasparagine                            | 278.114917 | B(i) |
| 195 | 3.19410439 | Phenylalanyaspartatic acid                       | 279.098758 | B(i) |
| 196 | 3.19410439 | Phenylalanyaspartatic acid                       | 279.098758 | B(i) |
| 197 | 3.13653008 | Phenylalanyglutamine                             | 292.130717 | B(i) |
| 198 | 5.93891412 | Phenylalanyisoleucine                            | 277.155864 | B(i) |
| 199 | 6.5214702  | Phenylalanyleucine                               | 277.155856 | B(i) |
| 200 | 6.46064502 | Phenylalanyleucine                               | 277.155948 | B(i) |
| 201 | 3.72488297 | Phenylalanylglycine                              | 221.092797 | B(i) |
| 202 | 5.44434947 | Phenylalanymethionine                            | 295.112314 | B(i) |
| 203 | 6.89790931 | Phenylalanyphenylalanine                         | 311.140352 | B(i) |
| 204 | 2.95429225 | Phenylalanyserine                                | 251.103872 | B(i) |
| 205 | 3.17092938 | Phenylalanythreonine                             | 265.119493 | B(i) |
| 206 | 7.22899356 | Phenylalanytryptophan                            | 350.151298 | B(i) |
| 207 | 5.18660281 | Phenylalanytyrosine                              | 327.135365 | B(i) |
| 208 | 4.86059598 | Phenylalanyvaline                                | 263.14028  | B(i) |

|     |            |                                                        |            |      |
|-----|------------|--------------------------------------------------------|------------|------|
| 209 | 8.52802166 | phosphatidylethanolamine-derivatives                   | 603.078566 | B(i) |
| 210 | 13.1503924 | Phytosphingosine                                       | 316.285624 | B(i) |
| 211 | 4.80100848 | procyanidin B1                                         | 577.136064 | A    |
| 212 | 3.71290323 | Prolysoleucine                                         | 227.140017 | B(i) |
| 213 | 2.85262963 | Polymethionine                                         | 245.09657  | B(i) |
| 214 | 4.73291997 | Prolyphenylalanine                                     | 261.12455  | B(i) |
| 215 | 5.38150626 | Prolytryptophan                                        | 300.135577 | B(i) |
| 216 | 5.30712742 | Prolytryptophan                                        | 300.135641 | B(i) |
| 217 | 3.27371929 | Prolytyrosine                                          | 277.11964  | B(i) |
| 218 | 2.42135073 | Prolyvaline                                            | 213.124254 | B(i) |
| 219 | 5.10467629 | Propanoic acid, 3-(2,4-dihydroxyphenyl)-               | 181.050033 | B(i) |
| 220 | 13.0211121 | Prostaglandin A(2) solution                            | 333.20776  | B(i) |
| 221 | 3.74263384 | Protocatechuic acid                                    | 153.018473 | A    |
| 222 | 10.0994278 | pseudochelerythrine                                    | 331.082724 | B(i) |
| 223 | 13.1474674 | Psychosine                                             | 460.328571 | B(i) |
| 224 | 2.7137586  | Pyridoxic acid                                         | 182.045261 | B(i) |
| 225 | 6.62652161 | Q3G2-A_6.19_595.1315                                   | 595.130278 | B(i) |
| 226 | 6.81673254 | Q3G6-R_6.33_609.1458                                   | 609.147076 | B(i) |
| 227 | 6.09974838 | Q3G7G_5.68_625.1412                                    | 625.142223 | B(i) |
| 228 | 6.94929725 | Quercetin-3-unk._Saleh_standards_463.09_7.04           | 463.088544 | B(i) |
| 229 | 7.02759519 | Quercetin                                              | 301.035685 | A    |
| 230 | 6.94929725 | Quercetin-3-?-D-Glucoside                              | 463.088544 | B(i) |
| 231 | 6.94929725 | Quercetin-3-beta-D-glucoside                           | 463.088544 | B(i) |
| 232 | 7.04764478 | Quercetin-3-D-galactoside_Saleh_standards_463.098_6.98 | 463.088746 | B(i) |
| 233 | 5.26659153 | quercetin-7-O-hexoside                                 | 465.104093 | B(i) |
| 234 | 6.62652161 | Quercetin-apiosyl-galactose                            | 595.130278 | B(i) |
| 235 | 6.91628834 | Quercetine -glucosides deriv.                          | 625.142398 | B(i) |
| 236 | 7.7848956  | Quercitrin                                             | 447.093847 | A    |
| 237 | 5.75849002 | Riboflavin                                             | 375.131051 | A    |

|     |            |                                         |            |      |
|-----|------------|-----------------------------------------|------------|------|
| 238 | 6.81673254 | Rutin                                   | 609.147076 | A    |
| 239 | 2.39926448 | S-Adenosyl-L-Homocysteine               | 383.114636 | B(i) |
| 240 | 4.37698247 | Salicin                                 | 285.095957 | B(i) |
| 241 | 12.4346051 | Secoisolariciresinol                    | 361.166095 | B(i) |
| 242 | 3.2080926  | Serysoleucine                           | 217.119063 | B(i) |
| 243 | 3.40800083 | Seryleucine                             | 217.119156 | B(i) |
| 244 | 2.03103124 | Serymethionine                          | 235.072309 | B(i) |
| 245 | 1.90745891 | Serymethionine                          | 235.076094 | B(i) |
| 246 | 4.07512761 | Seryphenylalanine                       | 251.103793 | B(i) |
| 247 | 4.90216259 | Serytryptophan                          | 290.11476  | B(i) |
| 248 | 2.8583113  | Serytyrosine                            | 267.098985 | B(i) |
| 249 | 2.8583113  | Serytyrosine                            | 267.098985 | B(i) |
| 250 | 5.59681576 | Sinapoylglucose                         | 385.114372 | B(i) |
| 251 | 5.8009771  | SinGlc_5.24_385.1133                    | 385.114702 | B(i) |
| 252 | 5.93495392 | SinGlciso2_5.47_385.1133                | 385.114399 | B(i) |
| 253 | 14.8008903 | Stearic acid or hexadecanoic acid       | 311.201838 | B(i) |
| 254 | 4.27818888 | Theophylline, anhydrous                 | 179.056689 | B(i) |
| 255 | 4.55041379 | threo-3-isopropylmalic acid             | 175.060457 | B(i) |
| 256 | 3.45442259 | Threonysoleucine                        | 231.134842 | B(i) |
| 257 | 3.67013011 | Threonyleucine                          | 231.134818 | B(i) |
| 258 | 2.43048702 | Threonymethionine                       | 249.091544 | B(i) |
| 259 | 4.3500164  | Threonyphenylalanine                    | 265.119413 | B(i) |
| 260 | 5.1047045  | Threonytryptophan                       | 304.130535 | B(i) |
| 261 | 3.07321524 | Threonytyrosine                         | 281.114673 | B(i) |
| 262 | 2.03566317 | Threonyvaline                           | 217.119168 | B(i) |
| 263 | 3.36124183 | Thymidine                               | 241.082931 | B(i) |
| 264 | 5.21449764 | trans-Cyclohexane-1,2-dicarboxylic acid | 171.065676 | B(i) |
| 265 | 3.84908562 | trans-zeatin-O-glucoside                | 380.156528 | B(i) |
| 266 | 10.6363828 | Tricetin                                | 301.071857 | B(i) |
| 267 | 11.5544366 | tricin                                  | 329.233475 | A    |

|     |            |                                 |            |      |
|-----|------------|---------------------------------|------------|------|
| 268 | 11.2135108 | trihydroxy-octadecadienoic acid | 327.217954 | B(i) |
| 269 | 4.47618925 | Tryptophyalanine                | 274.120102 | B(i) |
| 270 | 3.55535774 | Tryptophyasparagine             | 317.125972 | B(i) |
| 271 | 3.95396487 | Tryptophyaspartic acid          | 318.112354 | B(i) |
| 272 | 4.23833348 | Tryptophyglutamic acid          | 332.12517  | B(i) |
| 273 | 2.82507846 | Tryptophyhistidine              | 340.141626 | B(i) |
| 274 | 6.75092152 | Tryptophyisoleucine             | 316.166878 | B(i) |
| 275 | 7.16165321 | Tryptophyleucine                | 316.166862 | B(i) |
| 276 | 4.45851662 | Tryptophylglycine               | 260.104405 | B(i) |
| 277 | 2.8681586  | Tryptophyllysine                | 331.178086 | B(i) |
| 278 | 2.86799599 | Tryptophyllysine                | 331.178381 | B(i) |
| 279 | 7.60600922 | Tryptophyphenylalanine          | 350.151147 | B(i) |
| 280 | 5.97294588 | Tryptophyproline                | 300.135599 | B(i) |
| 281 | 3.70121264 | Tryptophyserine                 | 290.114948 | B(i) |
| 282 | 3.88829073 | Tryptophythreonine              | 304.130561 | B(i) |
| 283 | 7.86825169 | Tryptophytryptophan             | 389.161904 | B(i) |
| 284 | 5.9217862  | Tryptophytyrosine               | 366.146076 | B(i) |
| 285 | 5.75244988 | Tryptophyvaline                 | 302.151169 | B(i) |
| 286 | 5.67346677 | Tryptophyvaline                 | 302.151194 | B(i) |
| 287 | 1.89002412 | Tyrosine                        | 180.066018 | A    |
| 288 | 2.61929228 | Tyrosyalanine                   | 251.103798 | B(i) |
| 289 | 1.90752559 | Tyrosyaspatic acid              | 295.093831 | B(i) |
| 290 | 2.52234437 | Tyrosyglutamic acid             | 309.10951  | B(i) |
| 291 | 1.95853715 | Tyrosyglutamine                 | 308.125793 | B(i) |
| 292 | 4.75206145 | Tyrosyisoleucine                | 293.151066 | B(i) |
| 293 | 5.13016311 | Tyrosyleucine                   | 293.151125 | B(i) |
| 294 | 2.67238086 | Tyrosylglycine                  | 237.088051 | B(i) |
| 295 | 5.71461066 | Tyrosyphenylalanine             | 327.135175 | B(i) |
| 296 | 3.84110172 | Tyrosyproline                   | 277.119664 | B(i) |
| 297 | 1.95730166 | TyrosyThreonine                 | 281.114566 | B(i) |

|     |            |                         |            |      |
|-----|------------|-------------------------|------------|------|
| 298 | 6.12932267 | Tyrosytryptophan        | 366.145931 | B(i) |
| 299 | 4.19287591 | Tyrosytyrosine          | 343.130156 | B(i) |
| 300 | 1.89699736 | Uridine                 | 243.062221 | A    |
| 301 | 4.1893087  | Valysoleucine           | 229.155474 | B(i) |
| 302 | 4.56413141 | Valyleucine             | 229.155532 | B(i) |
| 303 | 3.50224187 | Valymethionine          | 247.112292 | B(i) |
| 304 | 5.26327185 | Valyphenylalanine       | 263.140409 | B(i) |
| 305 | 3.21705032 | Valyproline             | 213.123859 | B(i) |
| 306 | 3.66422518 | Valytyrosine            | 279.135224 | B(i) |
| 307 | 3.73959003 | Valytyrosine            | 279.135237 | B(i) |
| 308 | 7.27336927 | vanillic acid           | 167.034181 | A    |
| 309 | 6.90688148 | Vitexin-2"-O-rhamnoside | 577.156451 | A    |

**Table S9. The oligomers used in this study.**

| No. | Oligomer name      | Sequence (5' to 3')            | Purpose                                                                                                                                            |
|-----|--------------------|--------------------------------|----------------------------------------------------------------------------------------------------------------------------------------------------|
| 1   | U3-SBEIIb-CDS-T1-F | <u>GGCAAATTTGAAACACTTACTTG</u> | Oligomer-duplex for expressing gRNA. The underlined sequence was added for making overlapping with the pSR339- <i>AarI</i> digestion for ligation. |
| 2   | U3-SBEIIb-CDS-T1-R | <u>AAACCAAGTAAGTGTTTCAAATT</u> |                                                                                                                                                    |
| 3   | Tnos-F             | GCATGACGTTATTTATGAGATGG        | Vector sequence confirmation after insertion oligomer duplex into pSR339                                                                           |
| 4   | pUbi-F3            | GATATACTTGGATGATGGCAT          | Confirmation of T-DNA presence in T <sub>0</sub> plants                                                                                            |
| 5   | Cas9-97-R          | CAACTGAGTTCGTCCCGATGT          |                                                                                                                                                    |
| 6   | SBEIIb-TS1- F1     | CCTGTATGGTCTAGAGTTGCA          | Amplification of target site for Sanger sequencing                                                                                                 |
| 7   | SBEIIb-TS1- R1     | CAAGGGCAGGAGTTATGCCA           |                                                                                                                                                    |
